# Supplementary material for: Synthesis of axially chiral N-aryl benzimidazoles via chiral phosphoric acid catalyzed enantioselective oxidative aromatization
Source: Royal Society of Chemistry journal article supplement (doi:10.1039/d1nj06092a), 2022-01-01
Supplement: d1nj06092a1.pdf [file d1nj06092a1.pdf]

# Synthesis of axially chiral *N*-aryl benzimidazoles via chiral phosphoric acid catalyzed enantioselective oxidative aromatization

Jin-fang Chen <sup>a</sup>, Jin-yi Shi <sup>a</sup>, Cong-cong Yin <sup>a</sup>, Xin Cui <sup>b</sup>, Guang-xun Li <sup>b,\*</sup>, Zhuo Tang <sup>b,\*</sup>, Jin-zhong Zhao <sup>a,\*</sup>

<sup>a</sup> College of Art and Sciences, Shanxi Agricultural University, Taigu, Shanxi, 030800, China

<sup>b</sup> Natural Products Research Center, Chengdu Institution of Biology, Chinese Academy of Science, Chengdu, Sichuan 610041(China)

## Content

|                                                                                            |    |
|--------------------------------------------------------------------------------------------|----|
| 1. General experimental information.....                                                   | 2  |
| 2. Preparation of <i>o</i> -alkoxyl phenylamines .....                                     | 3  |
| 3. General procedure for the synthesis of <i>N</i> -aryl- <i>o</i> -phenylenediamines..... | 3  |
| 4. Optimization of the reaction conditions.....                                            | 5  |
| 5. General procedure for the preparation of products 4 .....                               | 6  |
| 6. Gram-scale procedure for the preparation of products 4c .....                           | 6  |
| 7. Aromatic aldehyde investigated under the optimal reaction condition .....               | 7  |
| 8. Characterization of the selected new products.....                                      | 8  |
| 9. NMR spectrum of the obtained new products .....                                         | 23 |
| 10. HPLC analysis spectrums.....                                                           | 49 |

## 1. General experimental information.

All reactions that required airless conditions were carried by standard procedures under nitrogen atmosphere. Commercially available reagents from Tansoole and Adamas-beta were used as received. The solvents were dried by distillation over the appropriate drying reagents. All chemical reagents were obtained from commercial suppliers and used without further purification. All unknown compounds are characterized by  $^1\text{H}$  NMR,  $^{13}\text{C}$  NMR, HRMS.

Thin-layer chromatography (TLC) was performed using glass-backed silica gel (250  $\mu\text{m}$ ) plates, and flash chromatography utilized 230-400 mesh silica gel from Scientific Adsorbents. Products were visualized by UV light. Melting points were measured on a Meltemp melting point apparatus and were not corrected.  $^1\text{H}$  NMR spectra were recorded on commercial instruments (400 MHz or 600 MHz). Chemical shifts were reported in ppm from tetramethylsilane with the solvent resonance as the internal standard ( $\text{CDCl}_3$ ,  $\delta = 7.28$ ). Spectra were reported as follows: chemical shift ( $\delta$  ppm), multiplicity (s = singlet, d = doublet, t = triplet, q = quartet, m = multiplet), coupling constants (Hz), integration and, assignment.  $^{13}\text{C}$  NMR spectra were collected on commercial instruments (101 MHz or 151 MHz) with complete proton decoupling. Chemical shifts were reported in ppm from the tetramethylsilane with the solvent resonance as internal standard ( $\text{CDCl}_3$ ,  $\delta = 77.0$ ). Mass spectra were recorded on a ThermoQuest Finnigan LCQDECA system equipped with an ESI source. Enantioselectivities were analyzed on HPLC with chiral columns. Optical rotations were measured on an Autopol IV Automatic Polarimeter at the sodium D-line (589 nm), unless otherwise indicated, using a Type 40T TempTrol<sup>TM</sup> cell of 1 dm path length and reported as follows:  $[\alpha]_{\text{D}}^{25.3}$  (c in g per 100 mL,  $\text{CH}_2\text{Cl}_2$ ).

## 2. Preparation of *o*-alkoxyl phenylamines

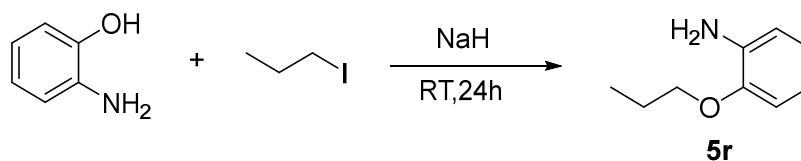

Aminophenol (10 mmol) and NaH (30 mmol) were suspended in dry DMF (10 mL). The corresponding 1-iodopropane (15 mmol) was added dropwise and the mixture was then stirred for 24 h at room temperature. The reaction was quenched by adding distilled water and the aqueous layer was extracted with ethyl acetate. Collected organic layers were dried over anhydrous Na<sub>2</sub>SO<sub>4</sub> and concentrated in vacuo. The pure product was obtained by flash chromatography over silica gel with ethyl acetate/petroleum ether as eluent to afford the desired **5r**.<sup>1</sup> Other *o*-alkoxyl phenylamines were prepared according to this method.

## 3. General procedure for the synthesis of *N*-aryl-*o*-phenylenediamines

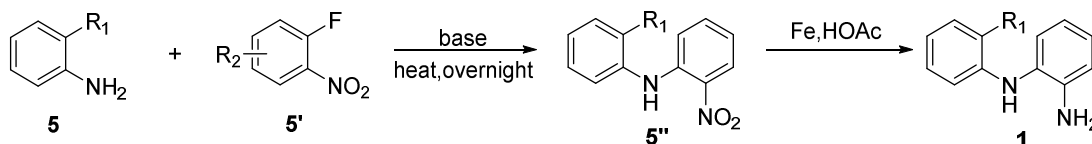

A reaction flask was charged with the aryl fluoride **5'** (1.0 eq, 10 mmol), the aryl amines **5** (1.0 eq, 10 mmol), and triethylamine (3.0 eq, 30 mmol). After addition, the system was heated at 120 °C with stirring under a nitrogen atmosphere. The reaction was monitored by TLC. When the reaction was completed, the crude reaction mixture was allowed to reach room temperature and the mixture was diluted with H<sub>2</sub>O. The resulting mixture was extracted with ethyl acetate. The aqueous phase was extracted three times with ethyl acetate. The combined organic layers were washed with two portions of a saturated solution of brine and then dried over anhydrous Na<sub>2</sub>SO<sub>4</sub> and filtered. The solvent was removed under reduced pressure to afford the crude **5''**, which could be utilized without purification.

A mixture of **5''** (1.0 eq), Fe powder (6.0 eq), and acetic acid (12 mL) were stirred at room temperature. After stirring for 1 h, the solvent was eliminated and saturated sodium bicarbonate aqueous solution and ethyl acetate were added and the layers were

separated. The organic layers were combined, washed with saturated brine, dried over anhydrous sodium sulfate, and evaporated under reduced pressure. The residue was purified by flash chromatography over silica gel with ethyl acetate/petroleum ether as eluent to afford *N*-aryl-*o*-phenylenediamines **1**.<sup>2</sup>

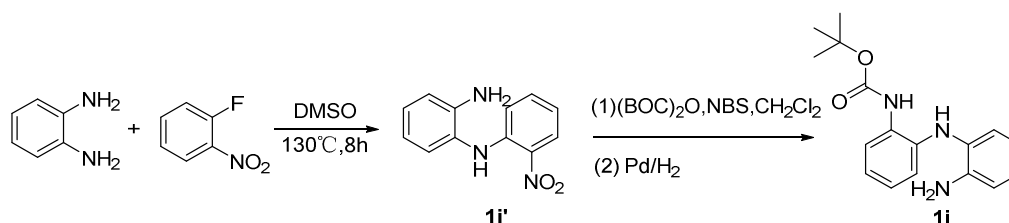

A reaction mixture of 1-fluoro-2-nitrobenzene (776 mg, 5.5 mmol) and 1,2-diaminobenzene (542 mg, 5 mmol) in DMSO (10 mL) was stirred at 130 °C for 8 h. After cooling to room temperature, it was quenched with H<sub>2</sub>O (10 mL) and extracted with ethyl acetate (3 × 20 mL). The combined organic layer was washed with brine (3 × 10 mL), dried over anhydrous Na<sub>2</sub>SO<sub>4</sub>, concentrated, and purified through silica gel chromatography ethyl acetate/petroleum ether to give N<sup>1</sup>-(2-nitrophenyl)benzene-1,2-diamine (**1i'**) as a reddish-brown solid (951 mg, 83% yield).<sup>3</sup>

To a stirred solution of a selected amine (1 mmol, 1 equiv.) and (Boc)<sub>2</sub>O (1 mmol, 1 equiv.) in CH<sub>2</sub>Cl<sub>2</sub> (0.2 mL) was added NBS (0.1 mmol, 0.1 equiv.) or Br<sub>3</sub>CCOCBr<sub>3</sub> (0.1 mmol, 0.1 equiv.) at room temperature. The mixture was stirred for the indicated time and the progress was monitored using TLC. After completion, the solvent was removed under reduced pressure and the product was purified by flash column chromatography (petroleum ether /ethyl acetate 15:1 to 10:1).<sup>4</sup>

#### 4. Optimization of the reaction conditions

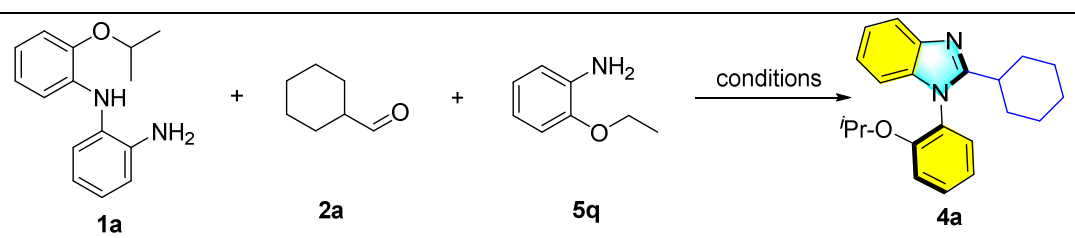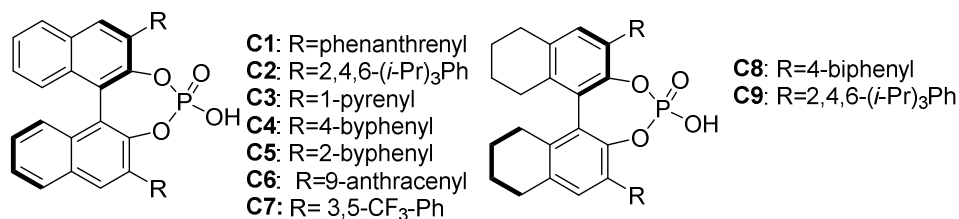

| Entry <sup>a</sup> | T (°C) | Cat.      | Add.              | Sol.                                  | Yield <sup>b</sup> (%) | Ee <sup>c</sup> (%) |
|--------------------|--------|-----------|-------------------|---------------------------------------|------------------------|---------------------|
| 1                  | 15     | <b>C1</b> | 3 Å MS            | toluene                               | 75                     | 66                  |
| 2                  | 15     | <b>C2</b> | 3 Å MS            | toluene                               | 68                     | 50                  |
| 3                  | 15     | <b>C3</b> | 3 Å MS            | toluene                               | 66                     | 54                  |
| 4                  | 15     | <b>C4</b> | 3 Å MS            | toluene                               | 64                     | 54                  |
| 5                  | 15     | <b>C5</b> | 3 Å MS            | toluene                               | 60                     | 46                  |
| 6                  | 15     | <b>C6</b> | 3 Å MS            | toluene                               | 70                     | 22                  |
| 7                  | 15     | <b>C7</b> | 3 Å MS            | toluene                               | 65                     | 22                  |
| 8                  | 15     | <b>C8</b> | 3 Å MS            | toluene                               | 83                     | 79                  |
| 9                  | 15     | <b>C9</b> | 3 Å MS            | toluene                               | 46                     | 30                  |
| 10                 | 15     | <b>C8</b> | 4 Å MS            | toluene                               | 60                     | 52                  |
| 11                 | 15     | <b>C8</b> | 5 Å MS            | toluene                               | 59                     | 46                  |
| 12                 | 15     | <b>C8</b> | MgSO <sub>4</sub> | toluene                               | 63                     | 50                  |
| 13                 | 15     | <b>C8</b> | 3 Å MS            | DCM                                   | 62                     | 51                  |
| 14                 | 15     | <b>C8</b> | 3 Å MS            | PhCl                                  | 66                     | 57                  |
| 15                 | 15     | <b>C8</b> | 3 Å MS            | CCl <sub>4</sub>                      | 79                     | 64                  |
| 16                 | 15     | <b>C8</b> | 3 Å MS            | CHCl <sub>3</sub>                     | 58                     | 41                  |
| 17                 | 15     | <b>C8</b> | 3 Å MS            | PhF                                   | 60                     | 55                  |
| 18                 | 15     | <b>C8</b> | 3 Å MS            | PhBr                                  | 69                     | 63                  |
| 19                 | 0      | <b>C8</b> | 3 Å MS            | toluene                               | 20                     | 40                  |
| 20                 | 30     | <b>C8</b> | 3 Å MS            | toluene                               | 85                     | 51                  |
| 21                 | 15     | <b>C8</b> | 3 Å MS            | toluene                               | 85                     | 79                  |
| 22                 | 15     | <b>C8</b> | 3 Å MS            | toluene<br>(10 mol% H <sub>2</sub> O) | 83                     | 75                  |
| 23                 | 15     | <b>C8</b> | -                 | toluene<br>(50 mol% H <sub>2</sub> O) | 61                     | 66                  |
| 24                 | 15     | <b>C8</b> | -                 | toluene<br>(10 mol% H <sub>2</sub> O) | 59                     | 54                  |

## 5. General procedure for the preparation of products 4

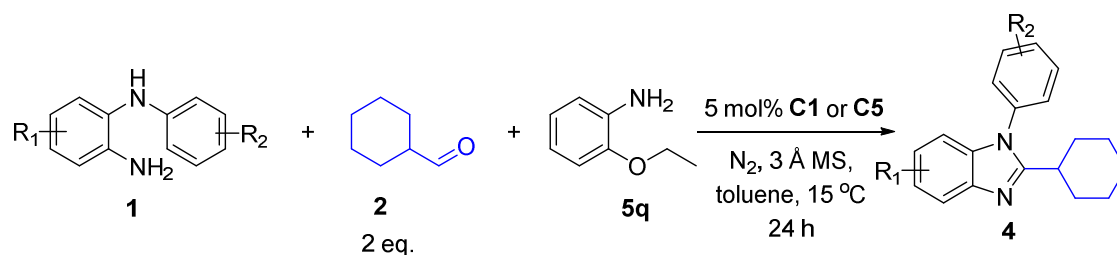

**General Procedure for Syntheses of axially chiral 4:** A reaction tube was charged with the **1** (0.01 mmol), aldehyde **2** (0.02 mmol), CPA (5 mmol%), phenylamine **5q** (0.01 mmol), 3 Å MS (40 mg), and toluene (0.4 mL). Then the reaction mixture was stirred for 24 h at 15 °C under a nitrogen atmosphere. After the completion of the reaction (TLC), the solvent was removed by a rotary evaporator. The crude products were purified by column chromatography eluting with petroleum ether/ethyl acetate (15:1-8:1) to give **4**.

**General Procedure for Syntheses of racemic 4:** To a stirred solution of **1** (0.1 mmol, 1 equiv), 2-ethoxyaniline **5q** (1 equiv), and aldehyde **2** (2 equiv) in toluene (1 mL) was added diphenyl phosphonate (5 mol%) and 3 Å MS (50 mg) at rt, and then the mixture was stirred at 80 °C for overnight. After completion monitored by TLC, the resulting solution was concentrated in vacuo, and the residue was purified by silica gel column chromatography (petroleum ether/ethyl acetate, 15:1-8:1) to afford racemic **4**.

## 6. Gram-scale procedure for the preparation of products 4c

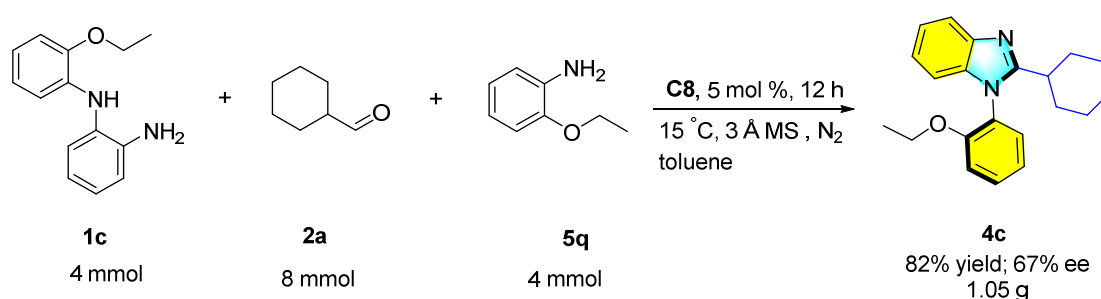

The reaction was performed with a general procedure for syntheses of axially chiral **4**. The products were purified via silica gel column chromatography.

## 7. Aromatic aldehyde investigated under the optimal reaction condition

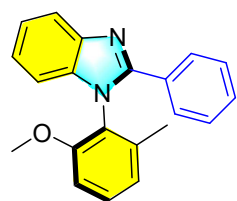

**4t**  
52% yield, 0 ee

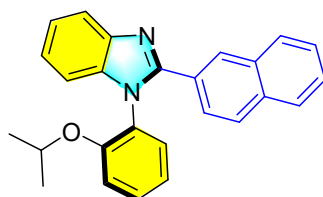

**4u**  
63% yield, 0 ee

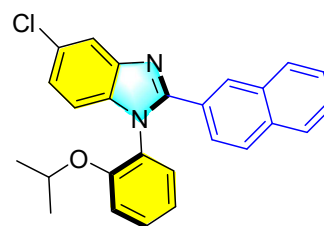

**4v**  
68% yield, 0 ee

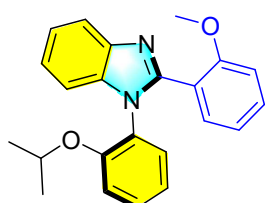

**4w**  
52% yield, 0 ee

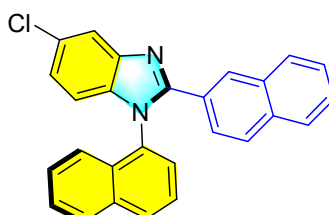

**4x**  
55% yield, 0 ee

## References

1. Tomas Gonec, Iveta Zadrazilova, Eoghan Nevin, *et al.* Synthesis and Biological Evaluation of N-Alkoxyphenyl-3-hydroxynaphthalene-2-carboxanilides, *Molecules*, **2015**, *20*, 9767-9787.
2. Shiqi Zhang, Ling Li, Guangxun Li, *et al.* Biomimetic alloxan-catalyzed intramolecular redox reaction with O<sub>2</sub>: One-pot atom-economic synthesis of sulfinyl-functionalized benzimidazoles, *Tetrahedron Lett.*, **2021**, *62*, 152688-152691.
3. Wenjun Chen, Yangxu Du, Manman Wang, *et al.* Synthesis of Benzo [4,5]imidazo[1,2-a]quinoxalines by I<sub>2</sub>-Mediated sp<sup>3</sup> C–H Amination, *Org. Chem. Front.*, **2020**, *7*, 3705-3708.
4. Oraphin Chantarasriwong, Banphot Jiangchareon, Christian Kurnia Putra, *et al.* NBS and Br<sub>3</sub>CCOCBr<sub>3</sub> as highly efficient catalysts for the chemoselective N-tert-butylloxycarbonylation of amines, *Tetrahedron Lett.*, **2016**, *57*, 4807-4811.

## 8. Characterization of the selected new products

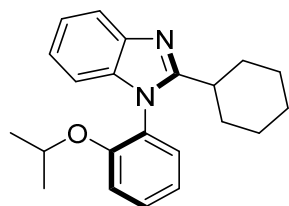

### 2-cyclohexyl-1-(2-isopropoxyphenyl)-1H-benzo[d]imidazole (4a)

Brown oil, yield: 85%.  $[\alpha]_D^{25.3} = +0.56^\circ$  (c 0.4,  $\text{CH}_2\text{Cl}_2$ ), ee = 79%; HPLC analysis: Daicel Chiralpak IC-H; Hexane/iPrOH = 90:10; flow: 1.0 mL/min;  $\lambda = 254$  nm; 25 °C; Retention times:  $t_{R1} = 6.7$  min (minor),  $t_{R2} = 12.2$  min (major).

**$^1\text{H}$  NMR (600 MHz,  $\text{CDCl}_3$ )**  $\delta$  7.78 (d,  $J = 8.0$  Hz, 1H), 7.50 – 7.43 (m, 1H), 7.28 (dd,  $J = 7.6, 1.4$  Hz, 1H), 7.22 (t,  $J = 7.6$  Hz, 1H), 7.11 (td,  $J = 15.1, 7.7$  Hz, 3H), 6.94 (d,  $J = 8.0$  Hz, 1H), 4.45 (dt,  $J = 12.1, 6.0$  Hz, 1H), 2.58 (ddd,  $J = 11.8, 8.2, 3.6$  Hz, 1H), 2.00 (d,  $J = 13.0$  Hz, 1H), 1.97 – 1.88 (m, 1H), 1.88 – 1.71 (m, 3H), 1.66 (qd,  $J = 12.8, 3.5$  Hz, 2H), 1.37 – 1.19 (m, 2H), 1.17 (d,  $J = 6.1$  Hz, 3H), 1.15 – 1.10 (m, 1H), 1.02 (d,  $J = 6.0$  Hz, 3H).

**$^{13}\text{C}$  NMR (151 MHz,  $\text{CDCl}_3$ )**  $\delta$  160.21, 153.73, 142.77, 136.42, 130.29, 129.75, 125.52, 121.95, 121.72, 120.90, 118.89, 114.99, 109.96, 77.25, 77.04, 76.83, 70.77, 36.49, 32.56, 30.92, 26.21 (d,  $J = 10.8$  Hz), 25.78, 21.69.

**HRMS (ESI-TOF)  $m/z$   $[\text{M} + \text{H}]^+$**  Calcd for  $\text{C}_{22}\text{H}_{27}\text{N}_2\text{O}$  335.2118; Found 335.2113.

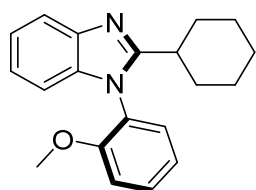

### 2-cyclohexyl-1-(2-methoxyphenyl)-1H-benzo[d]imidazole(4b)

Brown solid, yield: 82%, Mp: 77-79 °C.  $[\alpha]_D^{25.3} = +0.55^\circ$  (c 0.4,  $\text{CH}_2\text{Cl}_2$ ), ee = 51%; HPLC analysis: Daicel Chiralpak IC-H; Hexane/iPrOH = 95:5; flow: 1.0 mL/min;  $\lambda = 254$  nm; 25 °C; Retention times:  $t_{R1} = 16.1$  min (minor),  $t_{R2} = 22.4$  min (major).

**$^1\text{H}$  NMR (400 MHz,  $\text{CDCl}_3$ )**  $\delta$  7.82 (d,  $J = 8.0$  Hz, 1H), 7.53 (td,  $J = 8.1, 1.4$  Hz, 1H), 7.37 – 7.22 (m, 2H), 7.16 (dd,  $J = 14.4, 7.5$  Hz, 3H), 6.97 (d,  $J = 8.0$  Hz, 1H), 3.74 (s, 3H), 2.54 (dd,  $J = 9.4, 5.6$  Hz, 1H), 1.93 (s, 1H), 1.91 – 1.79 (m, 3H), 1.76 (d,  $J = 10.8$



Hz, 1H), 1.70 (dd,  $J = 10.9, 8.1$  Hz, 1H), 1.41 – 1.11 (m, 4H).

$^{13}\text{C}$  NMR (101 MHz,  $\text{CDCl}_3$ )  $\delta$  160.08, 155.40, 142.69, 136.27, 130.58, 129.55, 124.41, 122.16, 121.91, 121.12, 119.01, 112.36, 109.93, 77.39, 77.07, 76.76, 55.59, 36.55, 32.38, 31.30, 26.24 (d,  $J = 3.6$  Hz), 25.77.

HRMS (ESI-TOF)  $m/z$   $[\text{M} + \text{H}]^+$  Calcd for  $\text{C}_{20}\text{H}_{23}\text{N}_2\text{O}$  307.1805; Found 307.1815.

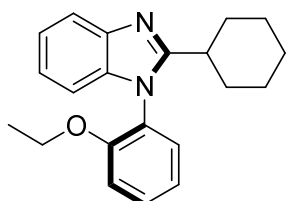

#### 2-cyclohexyl-1-(2-ethoxyphenyl)-1H-benzo[d]imidazole(4c)

Brown oil, yield: 87%.  $[\alpha]_{\text{D}}^{25.3} = -1.8^\circ$  (c 0.4,  $\text{CH}_2\text{Cl}_2$ ), ee = 67%; HPLC analysis: Daicel Chiralpak IC-H; Hexane/iPrOH = 90:10; flow: 1.0 mL/min;  $\lambda = 254$  nm; 25 °C; Retention times:  $t_{\text{R}1} = 6.8$  min (minor),  $t_{\text{R}2} = 11.6$  min (major).

$^1\text{H}$  NMR (600 MHz,  $\text{CDCl}_3$ )  $\delta$  7.79 (d,  $J = 8.0$  Hz, 1H), 7.48 (t,  $J = 7.8$  Hz, 1H), 7.29 (d,  $J = 7.7$  Hz, 1H), 7.23 (t,  $J = 7.5$  Hz, 1H), 7.18 – 7.07 (m, 3H), 6.95 (d,  $J = 7.9$  Hz, 1H), 4.07 – 3.92 (m, 2H), 2.57 (t,  $J = 11.6$  Hz, 1H), 1.93 (dt,  $J = 37.7, 12.6$  Hz, 2H), 1.82 (s, 2H), 1.78 – 1.62 (m, 3H), 1.37 – 1.17 (m, 3H), 1.15 (t,  $J = 6.9$  Hz, 3H).

$^{13}\text{C}$  NMR (151 MHz,  $\text{CDCl}_3$ )  $\delta$  160.08, 154.65, 142.50, 136.31, 130.48, 129.57, 124.61, 122.12, 121.90, 120.97, 118.88, 113.39, 109.98, 77.24, 77.03, 76.82, 64.08, 36.55, 32.44, 31.05, 26.23, 25.75, 14.44.

HRMS (ESI-TOF)  $m/z$   $[\text{M} + \text{H}]^+$  Calcd for  $\text{C}_{20}\text{H}_{23}\text{N}_2\text{O}$  321.1961; Found 321.1952.

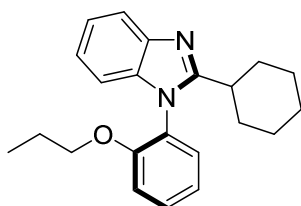

#### 2-cyclohexyl-1-(2-propoxyphenyl)-1H-benzo[d]imidazole(4d)

Brown oil, yield: 74%.  $[\alpha]_{\text{D}}^{25.3} = +10.3^\circ$  (c 0.4,  $\text{CH}_2\text{Cl}_2$ ), ee = 65%; HPLC analysis: Daicel Chiralpak IC-H; Hexane/iPrOH = 90:10; flow: 1.0 mL/min;  $\lambda = 254$  nm; 25 °C; Retention times:  $t_{\text{R}1} = 7.4$  min (minor),  $t_{\text{R}2} = 11.9$  min (major).

$^1\text{H}$  NMR (600 MHz,  $\text{CDCl}_3$ )  $\delta$  7.78 (d,  $J = 8.0$  Hz, 1H), 7.47 (t,  $J = 7.9$  Hz, 1H), 7.33 – 7.19 (m, 2H), 7.19 – 7.05 (m, 3H), 6.93 (d,  $J = 8.0$  Hz, 1H), 3.91 (dd,  $J = 15.4, 6.4$

Hz, 1H), 3.81 (dd,  $J = 15.5, 6.6$  Hz, 1H), 2.57 (t,  $J = 11.7$  Hz, 1H), 2.03 – 1.78 (m, 4H), 1.78 – 1.59 (m, 3H), 1.59 – 1.34 (m, 2H), 1.25 (ddd,  $J = 50.4, 26.0, 13.1$  Hz, 3H), 1.14 (d,  $J = 13.0$  Hz, 1H), 0.68 (t,  $J = 7.4$  Hz, 3H).

$^{13}\text{C}$  NMR (151 MHz,  $\text{CDCl}_3$ )  $\delta$  160.04, 154.97, 142.67, 136.50, 130.47, 129.62, 124.71, 122.01, 121.76, 120.92, 118.92, 113.41, 109.95, 77.25, 77.03, 76.82, 70.08, 36.51, 32.41, 31.01, 26.20 (d,  $J = 6.3$  Hz), 25.78, 22.24, 10.15.

HRMS (ESI-TOF)  $m/z$   $[\text{M} + \text{H}]^+$  Calcd for  $\text{C}_{22}\text{H}_{27}\text{N}_2\text{O}$  335.2118; Found 335.2127.

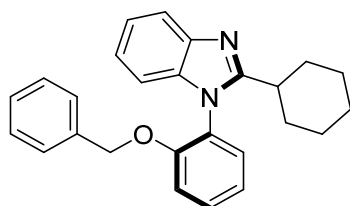

#### 1-(2-(benzyloxy)phenyl)-2-cyclohexyl-1H-benzo[d]imidazole(4e)

Brown solid, yield: 88%, Mp: 87-90 °C.  $[\alpha]_{\text{D}}^{25.3} = +0.56^\circ$  (c 0.4,  $\text{CH}_2\text{Cl}_2$ ), ee = 63%; HPLC analysis: Daicel Chiralpak IC-H; Hexane/iPrOH = 95:5; flow: 1.0 mL/min;  $\lambda = 254$  nm; 25 °C; Retention times:  $t_{\text{R}1} = 8.3$  min (minor),  $t_{\text{R}2} = 10.7$  min (major).

$^1\text{H}$  NMR (400 MHz,  $\text{CDCl}_3$ )  $\delta$  7.84 (d,  $J = 8.0$  Hz, 1H), 7.54 – 7.45 (m, 1H), 7.35 (dd,  $J = 7.6, 1.5$  Hz, 2H), 7.26 – 7.22 (m, 3H), 7.17 (dd,  $J = 14.2, 6.5$  Hz, 3H), 7.11 – 7.03 (m, 2H), 6.98 (d,  $J = 7.9$  Hz, 1H), 5.04 (d,  $J = 3.1$  Hz, 2H), 2.63 (s, 1H), 1.96 – 1.84 (m, 3H), 1.82 – 1.73 (m, 2H), 1.72 – 1.64 (m, 1H), 1.41 – 1.26 (m, 2H), 1.26 – 1.12 (m, 2H).

$^{13}\text{C}$  NMR (101 MHz,  $\text{CDCl}_3$ )  $\delta$  160.09, 154.46, 142.71, 136.46, 136.06, 130.55, 129.80, 128.50, 127.92, 126.75, 124.98, 122.18, 121.94, 121.52, 119.05, 114.20, 110.02, 77.34 (d,  $J = 11.5$  Hz), 77.08, 76.76, 70.31, 36.55, 32.53, 31.02, 26.22 (d,  $J = 4.6$  Hz), 25.78.

HRMS (ESI-TOF)  $m/z$   $[\text{M} + \text{H}]^+$  Calcd for  $\text{C}_{26}\text{H}_{27}\text{N}_2\text{O}$  383.2118; Found 383.2130.

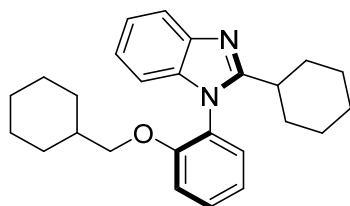

#### 2-cyclohexyl-1-(2-(cyclohexylmethoxy)phenyl)-1H-benzo[d]imidazole(4f)

Brown oil, yield: 81%.  $[\alpha]_{\text{D}}^{25.3} = -22.38^\circ$  (c 0.4,  $\text{CH}_2\text{Cl}_2$ ), ee = 59%; HPLC analysis:

Daicel Chiralpak IC-H; Hexane/iPrOH = 90:10; flow: 1.0 mL/min;  $\lambda = 254$  nm; 25 °C; Retention times:  $t_{R1} = 6.0$  min (minor),  $t_{R2} = 9.3$  min (major).

**$^1\text{H}$  NMR (400 MHz,  $\text{CDCl}_3$ )**  $\delta$  7.80 (d,  $J = 7.9$  Hz, 1H), 7.49 (dd,  $J = 11.3, 4.5$  Hz, 1H), 7.32 (dd,  $J = 8.0, 1.6$  Hz, 1H), 7.24 (t,  $J = 7.6$  Hz, 1H), 7.13 (dd,  $J = 14.9, 7.8$  Hz, 3H), 6.94 (d,  $J = 8.0$  Hz, 1H), 3.76 (dd,  $J = 9.0, 6.0$  Hz, 1H), 3.71 (ddd,  $J = 38.5, 9.0, 6.0$  Hz, 2H), 3.66 (dd,  $J = 8.9, 5.9$  Hz, 1H), 2.73 – 2.20 (m, 2H), 2.74 – 2.51 (m, 1H), 2.20 – 1.72 (m, 7H), 2.00 – 1.63 (m, 9H), 1.72 – 1.51 (m, 6H), 1.55 (d,  $J = 9.5$  Hz, 3H), 1.47 (d,  $J = 11.0$  Hz, 2H), 1.47 (d,  $J = 11.0$  Hz, 2H), 1.42 – 1.30 (m, 3H), 1.28 (s, 1H), 1.25 – 1.16 (m, 2H), 1.42 – 0.94 (m, 10H), 1.02 (td,  $J = 22.0, 11.6$  Hz, 3H), 0.71 (dd,  $J = 23.5, 11.8$  Hz, 2H), 0.71 (dd,  $J = 23.5, 11.8$  Hz, 3H).

**$^{13}\text{C}$  NMR (151 MHz,  $\text{CDCl}_3$ )**  $\delta$  159.99, 155.18, 142.67, 130.46, 129.64, 124.78, 121.85 (d,  $J = 36.3$  Hz), 120.83, 118.91, 113.47, 109.98, 77.21, 76.90 (d,  $J = 31.9$  Hz), 76.76 – 76.50 (m), 74.00, 37.28, 36.49, 32.39, 30.94, 29.37 (d,  $J = 17.7$  Hz), 26.17 (d,  $J = 9.9$  Hz), 25.79, 25.53.

**HRMS (ESI-TOF)  $m/z$   $[\text{M} + \text{H}]^+$**  Calcd for  $\text{C}_{26}\text{H}_{33}\text{N}_2\text{O}$  389.2587; Found 389.2571.

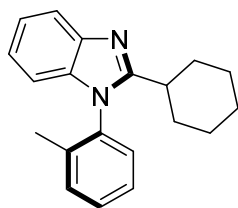

#### **2-cyclohexyl-1-(o-tolyl)-1H-benzo[d]imidazole(4g)**

Brown oil, yield: 86%.  $[\alpha]_{\text{D}}^{25.3} = +33.06^\circ$  (c 0.4,  $\text{CH}_2\text{Cl}_2$ ), ee = 61%; HPLC analysis: Daicel Chiralpak IC-H; Hexane/iPrOH = 90:10; flow: 1.0 mL/min;  $\lambda = 254$  nm; 25 °C; Retention times:  $t_{R1} = 6.3$  min (minor),  $t_{R2} = 7.4$  min (major).

**$^1\text{H}$  NMR (400 MHz,  $\text{CDCl}_3$ )**  $\delta$  7.84 (d,  $J = 8.0$  Hz, 1H), 7.52 – 7.43 (m, 2H), 7.43 – 7.37 (m, 1H), 7.26 (dd,  $J = 12.6, 6.5$  Hz, 2H), 7.17 (t,  $J = 7.6$  Hz, 1H), 6.88 (d,  $J = 8.0$  Hz, 1H), 2.50 (ddd,  $J = 15.1, 7.6, 3.9$  Hz, 1H), 1.97 (s, 3H), 1.96 – 1.64 (m, 7H), 1.40 – 1.11 (m, 3H).

**$^{13}\text{C}$  NMR (101 MHz,  $\text{CDCl}_3$ )**  $\delta$  159.31, 142.65, 136.47, 135.81, 134.73, 131.47, 129.51, 128.67, 127.32, 122.42, 122.11, 119.23, 109.98, 77.34 (d,  $J = 11.5$  Hz), 77.07, 76.76, 36.41, 32.37, 31.32, 26.12, 25.67, 17.34.

**HRMS (ESI-TOF)  $m/z$   $[\text{M} + \text{H}]^+$**  Calcd for  $\text{C}_{20}\text{H}_{23}\text{N}_2$  291.1856; Found 291.1839.

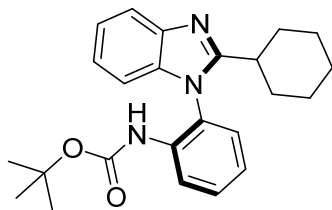

**tert-butyl (2-(2-cyclohexyl-1H-benzo[d]imidazol-1-yl)phenyl)carbamate(4h)**

Brown solid, yield: 88%, Mp: 129-131 °C.  $[\alpha]_D^{25.3} = +160.8^\circ$  (c 0.4, CH<sub>2</sub>Cl<sub>2</sub>), ee = 69%; HPLC analysis: Daicel Chiralpak IC-H; Hexane/iPrOH = 90:10; flow: 1.0 mL/min;  $\lambda = 254$  nm; 25 °C; Retention times:  $t_{R1} = 6.3$  min (minor),  $t_{R2} = 7.4$  min (major).

**<sup>1</sup>H NMR (600 MHz, CDCl<sub>3</sub>)**  $\delta$  8.28 (d,  $J = 8.2$  Hz, 1H), 7.84 (d,  $J = 8.0$  Hz, 1H), 7.54 (t,  $J = 7.8$  Hz, 1H), 7.31 (t,  $J = 7.6$  Hz, 1H), 7.24 – 7.16 (m, 3H), 6.95 (d,  $J = 8.0$  Hz, 1H), 5.94 (s, 1H), 2.67 – 2.40 (m, 1H), 1.86 (d,  $J = 10.3$  Hz, 3H), 1.82 – 1.72 (m, 3H), 1.68 (s, 1H), 1.40 (s, 9H), 1.30 (dd,  $J = 21.0, 8.4$  Hz, 1H), 1.24 – 1.15 (m, 2H).

**<sup>13</sup>C NMR (151 MHz, CDCl<sub>3</sub>)**  $\delta$  159.86, 152.37, 142.98, 135.65 (d,  $J = 14.4$  Hz), 130.41, 128.62, 123.78, 123.05, 122.81, 119.46, 109.92, 77.22, 77.01, 76.80, 36.36, 32.18, 31.49, 28.14, 26.01 (d,  $J = 7.1$  Hz), 25.60.

**HRMS (ESI-TOF) m/z [M + H]<sup>+</sup>** Calcd for C<sub>24</sub>H<sub>30</sub>N<sub>3</sub>O<sub>2</sub> 392.2333; Found 392.2343.

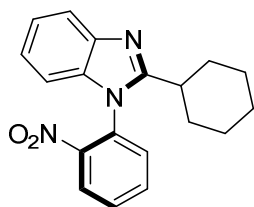

**2-cyclohexyl-1-(2-nitrophenyl)-1H-benzo[d]imidazole(4i)**

Brown oil, yield: 40%.  $[\alpha]_D^{25.3} = +8.45^\circ$  (c 0.4, CH<sub>2</sub>Cl<sub>2</sub>), ee = 43%; HPLC analysis: Daicel Chiralpak OD-H; Hexane/iPrOH = 80:20; flow: 1.0 mL/min;  $\lambda = 254$  nm; 25 °C; Retention times:  $t_{R1} = 6.3$  min (minor),  $t_{R2} = 7.8$  min (major).

**<sup>1</sup>H NMR (600 MHz, CDCl<sub>3</sub>)**  $\delta$  8.20 (d,  $J = 8.1$  Hz, 1H), 7.86 (t,  $J = 7.7$  Hz, 1H), 7.83 – 7.74 (m, 2H), 7.51 (d,  $J = 7.8$  Hz, 1H), 7.25 – 7.24 (m, 1H), 7.16 (t,  $J = 7.6$  Hz, 1H), 6.86 (d,  $J = 7.9$  Hz, 1H), 2.48 (t,  $J = 11.4$  Hz, 1H), 1.83 (ddd,  $J = 34.7, 25.9, 14.2$  Hz, 7H), 1.32 (d,  $J = 13.2$  Hz, 2H), 1.17 (dd,  $J = 13.0, 9.4$  Hz, 3H).

**<sup>13</sup>C NMR (151 MHz, CDCl<sub>3</sub>)**  $\delta$  159.15, 146.94, 142.80, 135.90, 134.30, 131.32, 130.54, 129.74, 125.97, 123.02, 122.76, 119.57, 109.02, 36.80, 32.58, 31.01, 29.69, 26.11 (d,  $J = 14.8$  Hz), 25.61.

**HRMS (ESI-TOF) m/z** [M + H]<sup>+</sup> Calcd for C<sub>19</sub>H<sub>20</sub>N<sub>3</sub>O<sub>2</sub> 322.1550; Found 322.1554.

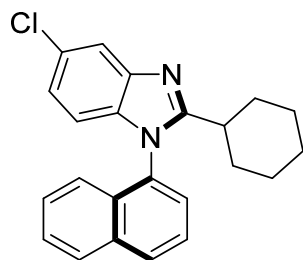

**6-chloro-2-cyclohexyl-1-(naphthalen-1-yl)-1H-benzo[d]imidazole(4j)**

Brown oil, yield: 78%. ee = 50%; HPLC analysis: Daicel Chiralpak IC-H; Hexane/iPrOH = 70:30; flow: 1.0 mL/min;  $\lambda$  = 254 nm; 25 °C; Retention times:  $t_{R1}$  = 5.2 min (minor),  $t_{R2}$  = 6.4 min (major).

**<sup>1</sup>H NMR (400 MHz, CDCl<sub>3</sub>)**  $\delta$  8.10 (d,  $J$  = 8.3 Hz, 1H), 8.03 (d,  $J$  = 8.3 Hz, 1H), 7.86 (s, 1H), 7.67 (t,  $J$  = 7.8 Hz, 1H), 7.60 (t,  $J$  = 7.5 Hz, 1H), 7.51 (d,  $J$  = 7.2 Hz, 1H), 7.44 (t,  $J$  = 7.7 Hz, 1H), 7.09 (dd,  $J$  = 7.7, 5.7 Hz, 2H), 6.69 (d,  $J$  = 8.5 Hz, 1H), 2.49 (dd,  $J$  = 15.5, 7.6 Hz, 1H), 1.97 (d,  $J$  = 12.1 Hz, 1H), 1.87 – 1.59 (m, 6H), 1.37 – 1.22 (m, 2H), 1.02 (ddt,  $J$  = 21.6, 12.2, 10.7 Hz, 2H).

**<sup>13</sup>C NMR (101 MHz, CDCl<sub>3</sub>)**  $\delta$  157.82 (s), 144.97 (s), 142.86 (s), 135.82 (s), 130.52 (s), 129.17 (s), 122.48 (s), 122.20 (s), 120.34 (s), 118.80 (s), 116.82 (s), 111.86 (s), 109.93 (s), 48.32 (s), 10.55 (s), 9.61 (s), 9.20 (s), 7.79 (s), 3.47 (d,  $J$  = 8.5 Hz).

**HRMS (ESI-TOF) m/z** [M + H]<sup>+</sup> Calcd for C<sub>23</sub>H<sub>22</sub>ClN<sub>2</sub> 361.1472; Found 361.1463.

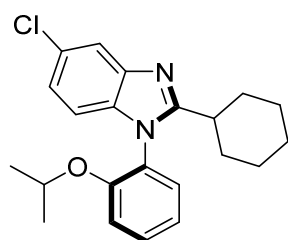

**5-chloro-2-cyclohexyl-1-(2-isopropoxyphenyl)-1H-benzo[d]imidazole(4k)**

Brown oil, yield: 89%.  $[\alpha]_D^{25.3}$  = -12.05° (c 0.4, CH<sub>2</sub>Cl<sub>2</sub>), ee = 73%; HPLC analysis: Daicel Chiralpak IC-H; Hexane/iPrOH = 95:5; flow: 1.0 mL/min;  $\lambda$  = 254 nm; 25 °C; Retention times:  $t_{R1}$  = 8.3 min (minor),  $t_{R2}$  = 10.7 min (major).

**<sup>1</sup>H NMR (400 MHz, CDCl<sub>3</sub>)**  $\delta$  7.69 (d,  $J$  = 8.5 Hz, 1H), 7.58 – 7.45 (m, 1H), 7.27 (s, 1H), 7.20 (dd,  $J$  = 8.5, 1.9 Hz, 1H), 7.11 (dd,  $J$  = 12.8, 4.9 Hz, 2H), 6.95 (d,  $J$  = 1.7 Hz, 1H), 6.86 – 6.70 (m, 1H), 4.52 (dt,  $J$  = 12.1, 6.0 Hz, 1H), 2.57 (ddd,  $J$  = 11.7, 7.6, 3.4

Hz, 1H), 2.04 – 1.89 (m, 2H), 1.89 – 1.74 (m, 3H), 1.72 – 1.60 (m, 2H), 1.51 – 1.38 (m, 1H), 1.32 (dd,  $J = 9.3, 6.4$  Hz, 1H), 1.20 (d,  $J = 6.0$  Hz, 3H), 1.14 (dd,  $J = 7.9, 4.7$  Hz, 1H), 1.07 (d,  $J = 6.0$  Hz, 3H).

$^{13}\text{C}$  NMR (101 MHz,  $\text{CDCl}_3$ )  $\delta$  161.14, 153.59, 141.40, 137.01, 130.65, 129.57, 127.69, 124.79, 122.32, 120.92, 119.72, 114.74, 110.12, 77.35, 77.03, 76.71, 70.71, 36.47, 32.44, 30.87, 26.14 (d,  $J = 7.2$  Hz), 25.73, 21.70 (d,  $J = 2.2$  Hz).

HRMS (ESI-TOF)  $m/z$   $[\text{M} + \text{H}]^+$  Calcd for  $\text{C}_{22}\text{H}_{26}\text{ClN}_2\text{O}$  369.1728; Found 369.1722.

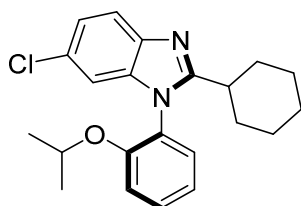

#### 6-chloro-2-cyclohexyl-1-(2-isopropoxyphenyl)-1H-benzo[d]imidazole(4l)

Brown oil, yield: 70%.  $[\alpha]_{\text{D}}^{25.3} = -36.45^\circ$  (c 0.4,  $\text{CH}_2\text{Cl}_2$ ), ee = 81%; HPLC analysis: Daicel Chiralpak IC-H; Hexane/iPrOH = 98:2; flow: 1.0 mL/min;  $\lambda = 254$  nm; 25 °C; Retention times:  $t_{\text{R}1} = 8.9$  min (minor),  $t_{\text{R}2} = 10.3$  min (major).

$^1\text{H}$  NMR (600 MHz,  $\text{CDCl}_3$ )  $\delta$  7.66 (d,  $J = 8.5$  Hz, 1H), 7.47 (t,  $J = 7.9$  Hz, 1H), 7.26 (d,  $J = 5.9$  Hz, 1H), 7.17 (dd,  $J = 8.5, 1.7$  Hz, 1H), 7.09 (dd,  $J = 12.1, 8.0$  Hz, 2H), 6.92 (d,  $J = 1.6$  Hz, 1H), 4.48 (dd,  $J = 12.0, 6.0$  Hz, 1H), 2.55 (dd,  $J = 13.4, 10.1$  Hz, 1H), 1.96 (d,  $J = 13.0$  Hz, 1H), 1.92 – 1.71 (m, 5H), 1.70 – 1.62 (m, 2H), 1.37 – 1.20 (m, 2H), 1.17 (d,  $J = 6.0$  Hz, 3H), 1.05 (d,  $J = 6.0$  Hz, 3H).

$^{13}\text{C}$  NMR (101 MHz,  $\text{CDCl}_3$ )  $\delta$  161.14, 153.58, 141.37, 137.00, 130.66, 129.55, 127.70, 124.76, 122.33, 120.92, 119.69, 114.74, 110.12, 77.36, 77.05, 76.73, 70.71, 36.47, 32.43, 30.87, 26.13 (d,  $J = 7.2$  Hz), 25.72, 21.69 (d,  $J = 2.1$  Hz).

HRMS (ESI-TOF)  $m/z$   $[\text{M} + \text{H}]^+$  Calcd for  $\text{C}_{22}\text{H}_{26}\text{ClN}_2\text{O}$  369.1728; Found 369.1720.

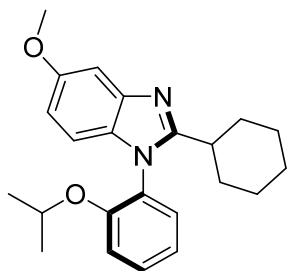

#### 2-cyclohexyl-1-(2-isopropoxyphenyl)-5-methoxy-1H-benzo[d]imidazole(4m)

Brown oil, yield: 63%.  $[\alpha]_D^{25.3} = -10.36^\circ$  (c 0.4, CH<sub>2</sub>Cl<sub>2</sub>), ee = 43%; HPLC analysis: Daicel Chiralpak IC-H; Hexane/iPrOH = 95:5; flow: 1.0 mL/min;  $\lambda = 254$  nm; 25 °C; Retention times:  $t_{R1} = 7.8$  min (minor),  $t_{R2} = 10.4$  min (major).

**<sup>1</sup>H NMR (400 MHz, CDCl<sub>3</sub>)**  $\delta$  7.52 – 7.43 (m, 1H), 7.33 (d,  $J = 2.1$  Hz, 1H), 7.31 – 7.27 (m, 2H), 7.16 – 7.06 (m, 2H), 6.81 (dt,  $J = 8.7, 5.5$  Hz, 2H), 4.46 (dd,  $J = 12.1, 6.0$  Hz, 1H), 3.87 (s, 3H), 2.55 (dd,  $J = 9.3, 5.7$  Hz, 1H), 2.06 – 1.89 (m, 2H), 1.88 – 1.71 (m, 3H), 1.67 (dd,  $J = 12.3, 2.8$  Hz, 2H), 1.41 – 1.22 (m, 2H), 1.19 (d,  $J = 6.1$  Hz, 3H), 1.17 – 1.10 (m, 1H), 1.05 (d,  $J = 6.0$  Hz, 3H).

**<sup>13</sup>C NMR (101 MHz, CDCl<sub>3</sub>)**  $\delta$  160.49, 155.90, 153.66, 143.31, 130.98, 130.24, 129.68, 125.52, 120.89, 114.98, 111.63, 110.30, 101.46, 77.31 (d,  $J = 11.6$  Hz), 77.05, 76.73, 70.75, 55.80, 36.53, 32.59, 30.95, 26.21 (d,  $J = 6.6$  Hz), 25.79, 21.72.

**HRMS (ESI-TOF) m/z [M + H]<sup>+</sup>** Calcd for C<sub>23</sub>H<sub>29</sub>N<sub>2</sub>O<sub>2</sub> 365.2224; Found 365.2234.

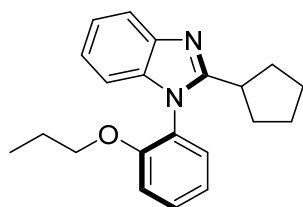

#### **2-cyclopentyl-1-(2-propoxyphenyl)-1H-benzo[d]imidazole(4n)**

White oil, yield: 42%.  $[\alpha]_D^{25.3} = -19.71^\circ$  (c 0.4, CH<sub>2</sub>Cl<sub>2</sub>), ee = 39%; HPLC analysis: Daicel Chiralpak IC-H; Hexane/iPrOH = 90:10; flow: 1.0 mL/min;  $\lambda = 254$  nm; 25 °C; Retention times:  $t_{R1} = 6.5$  min (minor),  $t_{R2} = 9.4$  min (major).

**<sup>1</sup>H NMR (600 MHz, CDCl<sub>3</sub>)**  $\delta$  7.77 (d,  $J = 8.0$  Hz, 1H), 7.47 (t,  $J = 7.8$  Hz, 1H), 7.30 (d,  $J = 7.4$  Hz, 1H), 7.22 (t,  $J = 7.6$  Hz, 1H), 7.19 – 7.06 (m, 3H), 6.93 (d,  $J = 8.0$  Hz, 1H), 3.86 (dq,  $J = 15.5, 6.6$  Hz, 2H), 3.09 – 2.95 (m, 1H), 2.11 (d,  $J = 8.0$  Hz, 1H), 1.90 (dd,  $J = 15.9, 6.7$  Hz, 3H), 1.85 (s, 2H), 1.63 – 1.48 (m, 4H), 0.68 (t,  $J = 7.4$  Hz, 3H).

**<sup>13</sup>C NMR (151 MHz, CDCl<sub>3</sub>)**  $\delta$  160.01, 155.14, 136.86, 130.48, 129.77, 124.91, 121.98, 121.75, 120.85, 118.86, 113.34, 109.85, 70.09, 37.47, 32.91, 31.73, 29.69, 25.85 (d,  $J = 19.0$  Hz), 22.24, 10.18.

**HRMS (ESI-TOF) m/z [M + H]<sup>+</sup>** Calcd for C<sub>21</sub>H<sub>25</sub>N<sub>2</sub>O 321.1961; Found 321.1952.

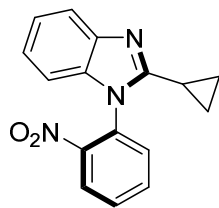

### 2-cyclopropyl-1-(2-nitrophenyl)-1H-benzo[d]imidazole(4o)

Brown oil, yield: 41%. ee = 41%; HPLC analysis: Daicel Chiralpak OD-H; Hexane/iPrOH = 80:20; flow: 1.0 mL/min;  $\lambda$  = 254 nm; 25 °C; Retention times:  $t_{R1}$  = 8.4 min (minor),  $t_{R2}$  = 10.5 min (major).

**$^1\text{H}$  NMR (400 MHz,  $\text{CDCl}_3$ )**  $\delta$  8.23 (d,  $J$  = 8.1 Hz, 1H), 7.89 (t,  $J$  = 7.7 Hz, 1H), 7.76 (dd,  $J$  = 10.3, 8.7 Hz, 2H), 7.64 (d,  $J$  = 7.8 Hz, 1H), 7.39 – 7.25 (m, 1H), 7.19 (t,  $J$  = 7.6 Hz, 1H), 6.97 (d,  $J$  = 8.0 Hz, 1H), 1.62 (ddd,  $J$  = 13.0, 8.3, 4.8 Hz, 1H), 1.48 – 1.36 (m, 1H), 1.34 – 1.21 (m, 2H), 1.02 (dd,  $J$  = 8.2, 2.9 Hz, 2H).

**$^{13}\text{C}$  NMR (101 MHz,  $\text{CDCl}_3$ )**  $\delta$  156.65 (s), 146.84 (s), 142.66 (s), 136.29 (s), 134.36 (s), 131.17 (s), 130.34 (s), 129.68 (s), 126.00 (s), 122.81 (d,  $J$  = 8.4 Hz), 119.21 (s), 108.81 (s), 77.37 (s), 77.05 (s), 76.74 (s), 9.82 (s), 8.85 (s), 7.98 (s).

**HRMS (ESI-TOF)  $m/z$  [ $M + H$ ] $^+$**  Calcd for  $\text{C}_{16}\text{H}_{14}\text{N}_3\text{O}_2$  280.1086; Found 280.1079.

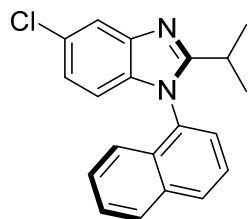

### 5-chloro-2-isopropyl-1-(naphthalen-1-yl)-1H-benzo[d]imidazole (4p)

White solid, yield: 80%, Mp: 123-124 °C. ee = 63%; HPLC analysis: Daicel Chiralpak AD-H; Hexane/iPrOH = 90:10; flow: 1.0 mL/min;  $\lambda$  = 254 nm; 25 °C; Retention times:  $t_{R1}$  = 7.5 min (minor),  $t_{R2}$  = 9.4 min (major).

**$^1\text{H}$  NMR (400 MHz,  $\text{CDCl}_3$ )**  $\delta$  8.05 (d,  $J$  = 8.4 Hz, 1H), 7.99 (d,  $J$  = 8.4 Hz, 1H), 7.82 (d,  $J$  = 1.6 Hz, 1H), 7.63 (t,  $J$  = 7.8 Hz, 1H), 7.56 (t,  $J$  = 7.6 Hz, 1H), 7.49 (d,  $J$  = 7.2 Hz, 1H), 7.41 (t,  $J$  = 7.6 Hz, 1H), 7.08–7.05 (m, 2H), 6.69 (d,  $J$  = 8.4 Hz, 1H), 2.84–2.77 (m, 1H), 1.32 (d,  $J$  = 6.8 Hz, 3H), 1.22 (d,  $J$  = 6.8 Hz, 3H);

**$^{13}\text{C}$  NMR (101 MHz,  $\text{CDCl}_3$ )**  $\delta$  162.5, 143.5, 135.8, 134.6, 132.0, 130.6, 130.3, 128.7, 128.0, 127.3, 126.5, 125.7, 123.1, 122.3, 119.2, 111.1, 27.1, 22.2, 21.5;



**HRMS (MALDI-TOF) m/z** calcd. for C<sub>20</sub>H<sub>18</sub>ClN<sub>2</sub> [M+H]<sup>+</sup> 321.1153, found 321.1152;

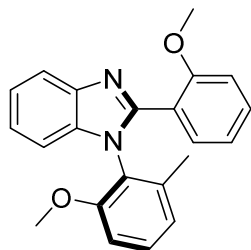

**1-(2-methoxy-6-methylphenyl)-2-(2-methoxyphenyl)-1H-benzo[d]imidazole (4q)**

Brown oil, yield: 50%; ee = 13%; HPLC analysis: Daicel Chiralpak IC-H; Hexane/iPrOH = 85:15; flow: 1.0 mL/min;  $\lambda$  = 254 nm; 25 °C; Retention times:  $t_{R1}$  = 20.2 min (minor),  $t_{R2}$  = 25.1 min (major).

**<sup>1</sup>H NMR (400 MHz, CDCl<sub>3</sub>)**  $\delta$  7.92 (d,  $J$  = 8.0 Hz, 1H), 7.52 (dd,  $J$  = 7.6, 1.6 Hz, 1H), 7.35 – 7.28 (m, 2H), 7.27 – 7.21 (m, 2H), 7.01 (d,  $J$  = 7.9 Hz, 1H), 6.97 – 6.88 (m, 2H), 6.78 (d,  $J$  = 8.3 Hz, 1H), 6.72 (d,  $J$  = 8.2 Hz, 1H), 3.55 (s, 3H), 3.49 (s, 3H), 2.08 (s, 3H).

**<sup>13</sup>C NMR (101 MHz, CDCl<sub>3</sub>)**  $\delta$  157.37 (s), 155.28 (s), 152.50 (s), 143.37 (s), 137.84 (s), 135.80 (s), 132.27 (s), 130.84 (s), 129.28 (s), 124.34 (s), 122.72 (s), 122.46 (s), 122.03 (s), 120.33 (s), 119.96 (d,  $J$  = 16.1 Hz), 110.47 (d,  $J$  = 5.6 Hz), 109.04 (s), 77.39 (s), 77.07 (s), 76.75 (s), 55.29 (s), 54.91 (s), 17.82 (s).

**HRMS (ESI-TOF) m/z** [M + H]<sup>+</sup> Calcd for C<sub>22</sub>H<sub>21</sub>N<sub>2</sub>O<sub>2</sub> 344.1598; Found 344.1598.

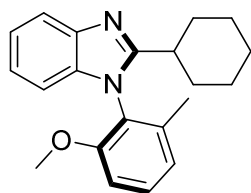

**2-cyclohexyl-1-(2-methoxy-6-methylphenyl)-1H-benzo[d]imidazole (4r)**

Brown oil, yield: 65%; ee = 43%; HPLC analysis: Daicel Chiralpak IC-H; Hexane/iPrOH = 95:5; flow: 1.0 mL/min;  $\lambda$  = 254 nm; 25 °C; Retention times:  $t_{R1}$  = 14.5 min (minor),  $t_{R2}$  = 20.5 min (major).

**<sup>1</sup>H NMR (400 MHz, CDCl<sub>3</sub>)**  $\delta$  7.85 (d,  $J$  = 8.0 Hz, 1H), 7.42 (t,  $J$  = 8.0 Hz, 1H), 7.35 – 7.21 (m, 1H), 7.16 (t,  $J$  = 7.2 Hz, 1H), 7.03 (d,  $J$  = 7.7 Hz, 1H), 6.95 (d,  $J$  = 8.3 Hz, 1H), 6.86 (d,  $J$  = 7.9 Hz, 1H), 3.69 (s, 3H), 2.48 – 2.34 (m, 1H), 1.99 (d,  $J$  = 10.9 Hz, 3H), 1.87 – 1.75 (m, 5H), 1.68 (d,  $J$  = 12.6 Hz, 1H), 1.43 – 1.26 (m, 3H), 1.20 (dt,  $J$  = 26.1, 8.1 Hz, 2H).

**<sup>13</sup>C NMR (101 MHz, CDCl<sub>3</sub>)** δ 160.01 (s), 155.97 (s), 142.77 (s), 138.26 (s), 135.07 (s), 130.02 (s), 123.25 (s), 122.81 (s), 122.23 (s), 121.94 (s), 119.10 (s), 109.72 (s), 109.45 (s), 55.62 (s), 36.67 (s), 31.87 (s), 31.50 (s), 26.24 (d, *J* = 2.6 Hz), 25.74 (s), 17.44 (s).

**HRMS (ESI-TOF) m/z [M + H]<sup>+</sup>** Calcd for C<sub>21</sub>H<sub>25</sub>N<sub>2</sub>O 321.1961; Found 321.1977.

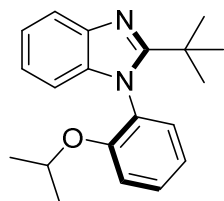

#### 2-(tert-butyl)-1-(2-isopropoxyphenyl)-1H-benzo[d]imidazole (4s)

Brown oil, yield: 43%; ee = 29%; HPLC analysis: Daicel Chiralpak IC-H; Hexane/iPrOH =90:10; flow: 1.0 mL/min; λ = 254 nm; 25 °C; Retention times: t<sub>R1</sub> = 7.1 min (minor), t<sub>R2</sub> =12.5 min (major).

**<sup>1</sup>H NMR (400 MHz, CDCl<sub>3</sub>)** δ 7.81 (d, *J* = 8.0 Hz, 1H), 7.50 (dt, *J* = 9.4, 6.4 Hz, 1H), 7.34 (dd, *J* = 8.0, 1.5 Hz, 1H), 7.23 (t, *J* = 7.6 Hz, 1H), 7.09 (dt, *J* = 17.2, 7.2 Hz, 3H), 6.72 (d, *J* = 8.0 Hz, 1H), 4.51 (dd, *J* = 12.1, 6.0 Hz, 1H), 1.38 (s, 9H), 1.16 (d, *J* = 6.1 Hz, 3H), 0.99 (d, *J* = 6.0 Hz, 3H).

**<sup>13</sup>C NMR (151 MHz, CDCl<sub>3</sub>)** δ 161.87 (s), 154.44 (s), 138.55 (s), 130.93 (d, *J* = 95.6 Hz), 129.38 (s), 127.22 (s), 121.84 (d, *J* = 64.4 Hz), 120.11 (s), 118.84 (s), 113.73 (s), 109.80 (s), 77.23 (s), 77.02 (s), 76.80 (s), 70.20 (s), 34.90 (s), 21.51 (s).

**HRMS (ESI-TOF) m/z [M + H]<sup>+</sup>** Calcd for C<sub>20</sub>H<sub>25</sub>N<sub>2</sub>O 309.1961; Found 309.1974.

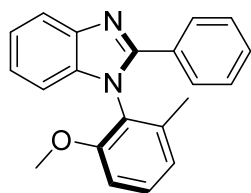

#### 1-(2-methoxy-6-methylphenyl)-2-phenyl-1H-benzo[d]imidazole (4t)

Brown oil, yield: 52%; ee = 0; HPLC analysis: Daicel Chiralpak AD-H; Hexane/iPrOH =80:20; flow: 1.0 mL/min; λ = 254 nm; 25 °C; Retention times: t<sub>R1</sub> = 5.5 min (minor), t<sub>R2</sub> = 9.4 min (major).

**<sup>1</sup>H NMR (400 MHz, CDCl<sub>3</sub>)** δ 7.92 (d, *J* = 8.0 Hz, 1H), 7.71 – 7.59 (m, 2H), 7.46 – 7.20 (m, 6H), 6.97 (dd, *J* = 7.8, 4.1 Hz, 2H), 6.89 (d, *J* = 8.3 Hz, 1H), 3.58 (s, 3H), 1.95 (s, 3H).

**<sup>13</sup>C NMR (101 MHz, CDCl<sub>3</sub>)** δ 155.76 (s), 153.11 (s), 143.24 (s), 137.82 (s), 136.53 (s), 130.63 (s), 130.04 (s), 129.38 (s), 128.20 (d, *J* = 5.8 Hz), 124.75 (s), 122.95 (d, *J* = 14.8 Hz), 122.55 (s), 119.73 (s), 110.41 (s), 109.66 (s), 77.37 (s), 77.05 (s), 76.74 (s), 55.69 (s), 17.58 (s).

**HRMS (ESI-TOF) m/z [M + H]<sup>+</sup>** Calcd for C<sub>21</sub>H<sub>19</sub>N<sub>2</sub>O 315.1492; Found 315.1501.

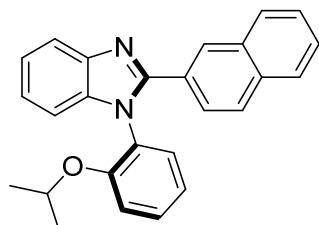

#### 1-(2-isopropoxyphenyl)-2-(naphthalen-2-yl)-1H-benzo[d]imidazole (4u)

Brown oil, yield: 63%; ee = 0; HPLC analysis: Daicel Chiralpak IC-H; Hexane/iPrOH = 90:10; flow: 1.0 mL/min; λ = 254 nm; 25 °C; Retention times: t<sub>R1</sub> = 13.7 min (minor), t<sub>R2</sub> = 17.5 min (major).

**<sup>1</sup>H NMR (400 MHz, CDCl<sub>3</sub>)** δ 8.14 (s, 1H), 7.95 (s, 1H), 7.80 (d, *J* = 2.3 Hz, 3H), 7.73 (d, *J* = 7.9 Hz, 1H), 7.46 (dd, *J* = 8.2, 4.5 Hz, 4H), 7.36 (t, *J* = 7.1 Hz, 1H), 7.28 (s, 1H), 7.20 (s, 1H), 7.09 (s, 1H), 6.98 (d, *J* = 8.2 Hz, 1H), 4.36 – 4.27 (m, 1H), 1.02 (d, *J* = 6.0 Hz, 3H), 0.69 (d, *J* = 6.0 Hz, 3H).

**<sup>13</sup>C NMR (101 MHz, CDCl<sub>3</sub>)** δ 153.23 (d, *J* = 17.4 Hz), 143.21 (s), 137.55 (s), 133.44 (s), 132.89 (s), 130.19 (s), 129.39 (s), 128.66 – 128.25 (m), 127.70 (d, *J* = 15.9 Hz), 126.80 (s), 126.36 (d, *J* = 17.6 Hz), 125.77 (s), 122.96 (s), 122.60 (s), 120.70 (s), 119.57 (s), 114.43 (s), 110.73 (s), 77.42 (s), 77.10 (s), 76.78 (s), 70.09 (s), 21.72 (s), 20.84 (s).

**HRMS (ESI-TOF) m/z [M + H]<sup>+</sup>** Calcd for C<sub>26</sub>H<sub>23</sub>N<sub>2</sub>O 379.1805; Found 379.1820.

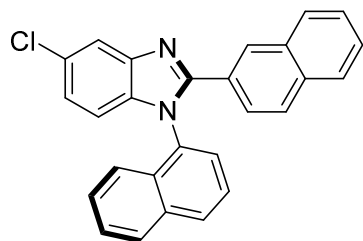

#### 5-chloro-1-(naphthalen-1-yl)-2-(naphthalen-2-yl)-1H-benzo[d]imidazole (4v)

Brown oil, yield: 55%; ee = 0; HPLC analysis: Daicel Chiralpak AD-H; Hexane/iPrOH = 80:20; flow: 1.0 mL/min; λ = 254 nm; 25 °C; Retention times: t<sub>R1</sub> = 23.5 min (minor), t<sub>R2</sub> = 37.3 min (major).

**<sup>1</sup>H NMR (400 MHz, CDCl<sub>3</sub>)** δ 8.14 – 7.98 (m, 4H), 7.73 (d, *J* = 7.9 Hz, 1H), 7.66 – 7.52 (m, 5H), 7.49 – 7.38 (m, 5H), 7.19 (dd, *J* = 8.6, 1.8 Hz, 1H), 6.83 (dd, *J* = 11.9, 5.5 Hz, 1H).

**<sup>13</sup>C NMR (101 MHz, CDCl<sub>3</sub>)** δ 154.49 (s), 143.84 (s), 136.97 (s), 134.51 (s), 133.57 (s), 133.16 (s), 132.73 (s), 130.07 (d, *J* = 6.9 Hz), 129.18 (s), 128.66 (s), 128.02 (d, *J* = 4.4 Hz), 127.58 (s), 127.22 (s), 126.73 (d, *J* = 12.3 Hz), 126.47 (s), 125.73 (s), 125.38 (s), 123.88 (s), 122.56 (s), 120.98 (s), 119.60 (s), 118.46 (s), 115.07 (s), 111.78 (s), 111.47 (s).

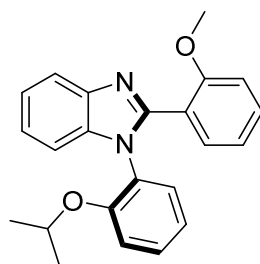

#### **1-(2-isopropoxyphenyl)-2-(2-methoxyphenyl)-1H-benzo[d]imidazole (4w)**

Brown oil, yield: 52%; ee = 0; HPLC analysis: Daicel Chiralpak IC-H; Hexane/iPrOH = 85:15; flow: 1.0 mL/min; λ = 254 nm; 25 °C; Retention times: *t*<sub>R1</sub> = 18.0 min (minor), *t*<sub>R2</sub> = 23.8 min (major).

**<sup>1</sup>H NMR (400 MHz, CDCl<sub>3</sub>)** δ 7.90 (d, *J* = 7.9 Hz, 1H), 7.61 (dd, *J* = 7.5, 1.6 Hz, 1H), 7.40 – 7.21 (m, 5H), 7.17 (d, *J* = 7.9 Hz, 1H), 7.05 – 6.89 (m, 3H), 6.77 (d, *J* = 8.3 Hz, 1H), 4.52 – 4.30 (m, 1H), 3.49 (s, 3H), 1.09 (d, *J* = 6.0 Hz, 3H), 0.96 (d, *J* = 6.0 Hz, 3H).

**<sup>13</sup>C NMR (101 MHz, CDCl<sub>3</sub>)** δ 157.13 (s), 152.76 (s), 152.23 (s), 143.19 (s), 136.68 (s), 132.41 (s), 130.92 (s), 129.27 (d, *J* = 4.8 Hz), 126.39 (s), 122.47 (s), 121.96 (s), 120.52 (s), 120.29 (s), 119.82 (s), 119.59 (s), 113.87 (s), 110.84 (s), 110.59 (s), 77.38 (s), 77.06 (s), 76.74 (s), 70.00 (s), 54.83 (s), 21.80 (s), 21.15 (s).

**HRMS (ESI-TOF) *m/z* [M + H]<sup>+</sup>** Calcd for C<sub>23</sub>H<sub>23</sub>N<sub>2</sub>O<sub>2</sub> 359.1754; Found 359.1762.

**HRMS (ESI-TOF) *m/z* [M + H]<sup>+</sup>** Calcd for C<sub>27</sub>H<sub>18</sub>ClN<sub>2</sub> 405.1153; Found 405.1164.

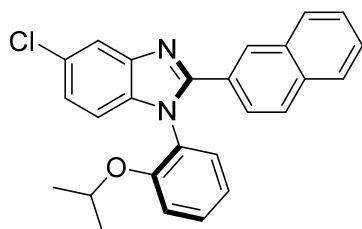

### 5-chloro-1-(2-isopropoxyphenyl)-2-(naphthalen-2-yl)-1H-benzo[d]imidazole (4x)

Brown oil, yield: 68%. ee = 0; HPLC analysis: Daicel Chiralpak AD-H; Hexane/iPrOH = 80:20; flow: 1.0 mL/min;  $\lambda$  = 254 nm; 25 °C; Retention times:  $t_{R1}$  = 8.8 min (minor),  $t_{R2}$  = 12.7 min (major).

**<sup>1</sup>H NMR (400 MHz, CDCl<sub>3</sub>)**  $\delta$  8.10 (s, 1H), 7.78 (ddd,  $J$  = 26.0, 21.0, 8.3 Hz, 5H), 7.55 – 7.40 (m, 4H), 7.31 (dd,  $J$  = 13.1, 4.6 Hz, 1H), 7.16 (d,  $J$  = 1.6 Hz, 1H), 7.10 (s, 1H), 6.99 (d,  $J$  = 8.3 Hz, 1H), 4.42 – 4.31 (m, 1H), 1.05 (d,  $J$  = 6.0 Hz, 3H), 0.71 (d,  $J$  = 6.0 Hz, 3H).

**<sup>13</sup>C NMR (101 MHz, CDCl<sub>3</sub>)**  $\delta$  154.13 (s), 153.03 (s), 141.80 (s), 138.10 (s), 133.52 (s), 132.83 (s), 130.52 (s), 129.25 (s), 128.83 – 128.44 (m), 127.88 (s), 127.63 (s), 126.97 (s), 126.37 (s), 125.85 (s), 125.58 (s), 123.26 (s), 120.77 (s), 120.39 (s), 114.33 (s), 110.83 (s), 77.37 (s), 77.05 (s), 76.74 (s), 70.15 (s), 21.73 (s), 20.84 (s).

**HRMS (ESI-TOF) m/z [M + H]<sup>+</sup>** Calcd for C<sub>26</sub>H<sub>22</sub>ClN<sub>2</sub>O 413.1415; Found 413.1422.

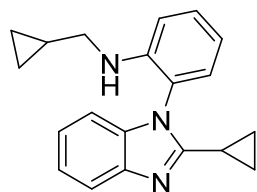

### 2-(2-cyclopropyl-1H-benzo[d]imidazol-1-yl)-N-(cyclopropylmethyl)aniline (7a)

Brown oil, yield: 78%; ee = 0; HPLC analysis: Daicel Chiralpak IC-H; Hexane/iPrOH = 95:5; flow: 1.0 mL/min;  $\lambda$  = 254 nm; 25 °C; Retention times:  $t_{R1}$  = 8.4 min (minor),  $t_{R2}$  = 10.5 min (major).

**<sup>1</sup>H NMR (400 MHz, CDCl<sub>3</sub>)**  $\delta$  7.75 (d,  $J$  = 7.9 Hz, 1H), 7.40 (t,  $J$  = 7.7 Hz, 1H), 7.26 (d,  $J$  = 7.8 Hz, 1H), 7.18 (t,  $J$  = 7.8 Hz, 2H), 7.04 (d,  $J$  = 7.8 Hz, 1H), 6.95 – 6.78 (m, 2H), 3.62 (s, 1H), 2.99 (d,  $J$  = 4.9 Hz, 2H), 1.79 (d,  $J$  = 4.0 Hz, 1H), 1.31 (d,  $J$  = 24.6 Hz, 3H), 1.15 – 0.83 (m, 3H), 0.58 – 0.35 (m, 2H), 0.10 (s, 2H).

**<sup>13</sup>C NMR (101 MHz, CDCl<sub>3</sub>)**  $\delta$  157.82 (s), 144.97 (s), 142.86 (s), 135.82 (s), 130.52 (s), 129.17 (s), 122.48 (s), 122.20 (s), 120.34 (s), 118.80 (s), 116.82 (s), 111.86 (s), 109.93 (s), 48.32 (s), 10.55 (s), 9.61 (s), 9.20 (s), 7.79 (s), 3.47 (d,  $J$  = 8.5 Hz).

**HRMS (ESI-TOF) m/z [M + H]<sup>+</sup>** Calcd for C<sub>20</sub>H<sub>22</sub>N<sub>3</sub> 304.1814; Found 304.1806.

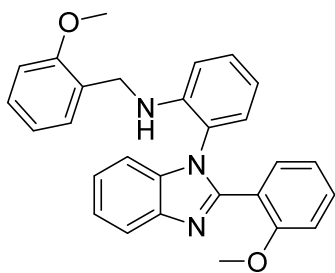

**N-(2-methoxybenzyl)-2-(2-(2-methoxyphenyl)-1H-benzo[d]imidazol-1-yl)aniline(7b)**

Brown oil, yield: 65%; ee = 0; HPLC analysis: Daicel Chiralpak OD-H; Hexane/iPrOH = 90:10; flow: 1.0 mL/min;  $\lambda$  = 254 nm; 25 °C; Retention times:  $t_{R1}$  = 7.5 min (minor),  $t_{R2}$  = 9.6 min (major).

**$^1\text{H}$  NMR (400 MHz,  $\text{CDCl}_3$ )**  $\delta$  7.95 (d,  $J$  = 7.9 Hz, 1H), 7.58 (d,  $J$  = 7.4 Hz, 1H), 7.37 (dd,  $J$  = 13.6, 7.0 Hz, 2H), 7.31 – 7.14 (m, 4H), 7.08 (d,  $J$  = 7.3 Hz, 1H), 6.99 (t,  $J$  = 7.3 Hz, 1H), 6.93 – 6.76 (m, 5H), 6.58 (t,  $J$  = 7.4 Hz, 1H), 4.32 (d,  $J$  = 12.3 Hz, 3H), 3.66 (s, 3H), 3.50 (s, 3H).

**$^{13}\text{C}$  NMR (101 MHz,  $\text{CDCl}_3$ )**  $\delta$  157.42 (s), 157.17 (s), 152.11 (s), 144.19 (s), 143.38 (s), 135.64 (s), 132.07 (s), 131.26 (s), 129.72 (s), 128.63 – 128.24 (m), 126.60 (s), 123.01 (s), 122.54 (s), 122.10 (s), 120.44 (d,  $J$  = 7.2 Hz), 119.90 (s), 119.66 (s), 116.34 (s), 111.65 (s), 111.25 (s), 110.78 (s), 110.14 (s), 77.50 (s), 77.18 (s), 76.86 (s), 54.98 (s), 43.03 (s).

**HRMS (ESI-TOF)  $m/z$   $[\text{M} + \text{H}]^+$**  Calcd for  $\text{C}_{28}\text{H}_{26}\text{N}_3\text{O}_2$  436.2025; Found 436.2017.

## 9. NMR spectrum of the obtained new products

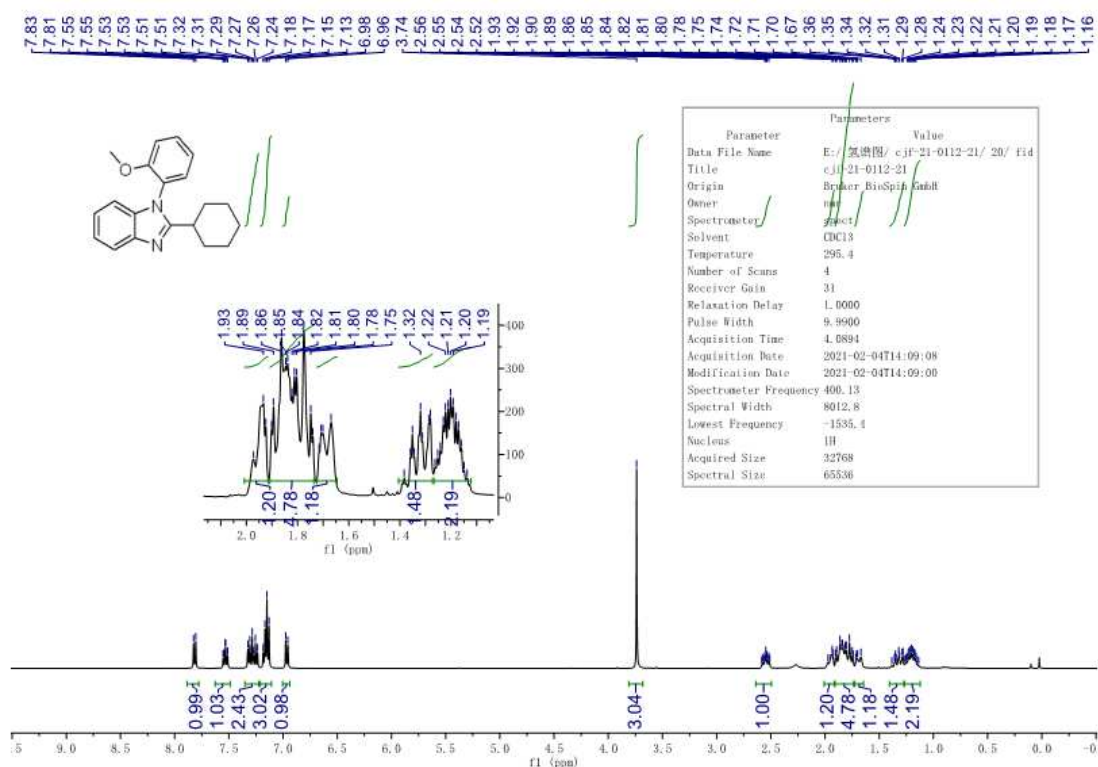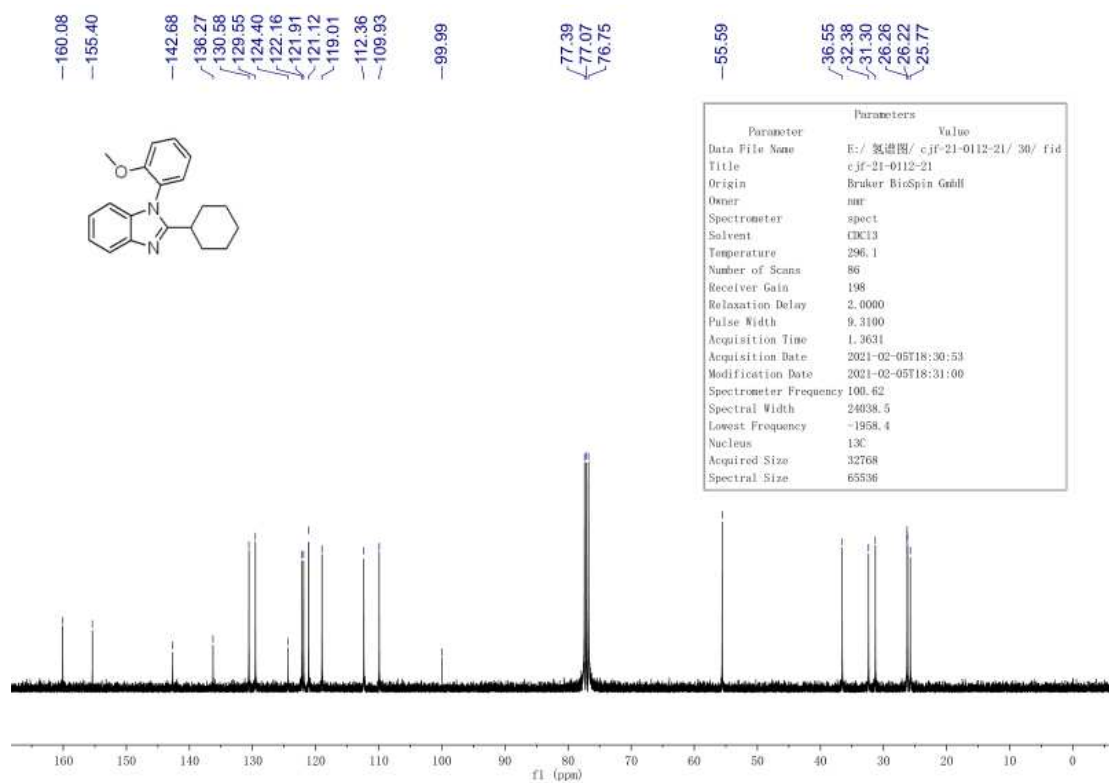

7.80  
7.79  
7.49  
7.48  
7.47  
7.29  
7.28  
7.26  
7.24  
7.23  
7.22  
7.15  
7.14  
7.13  
7.11  
7.10  
6.95

4.04  
4.02  
4.01  
4.00  
3.99  
3.97  
3.96  
3.95

2.59  
2.57  
2.55

1.96  
1.91  
1.82  
1.76  
1.73  
1.71  
1.69  
1.67  
1.65  
1.30  
1.26  
1.20  
1.18  
1.16  
1.14

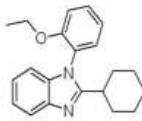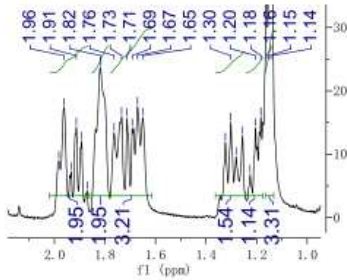

| Parameter              | Value                                     |
|------------------------|-------------------------------------------|
| Data File Name         | E:/ 氮谱图/ cjf-21-0607-2/ 1/ fid            |
| Title                  | cjf-21-0607-2                             |
| Origin                 | UXNM, Bruker Analytische Messtechnik GmbH |
| Owner                  | root                                      |
| Site                   |                                           |
| Spectrometer           | av600                                     |
| Author                 |                                           |
| Solvent                | CDCl3                                     |
| Experiment             | 1D                                        |
| Number of Scans        | 1                                         |
| Receiver Gain          | 256                                       |
| Relaxation Delay       | 2.0000                                    |
| Pulse Width            | 15.0000                                   |
| Acquisition Time       | 1.3631                                    |
| Acquisition Date       | 2021-06-09T23:50:05                       |
| Modification Date      | 2021-06-10T10:27:00                       |
| Spectrometer Frequency | 600.13                                    |
| Spectral Width         | 12019.2                                   |
| Lowest Frequency       | -1225.5                                   |
| Nucleus                | 1H                                        |
| Acquired Size          | 16384                                     |
| Spectral Size          | 32768                                     |

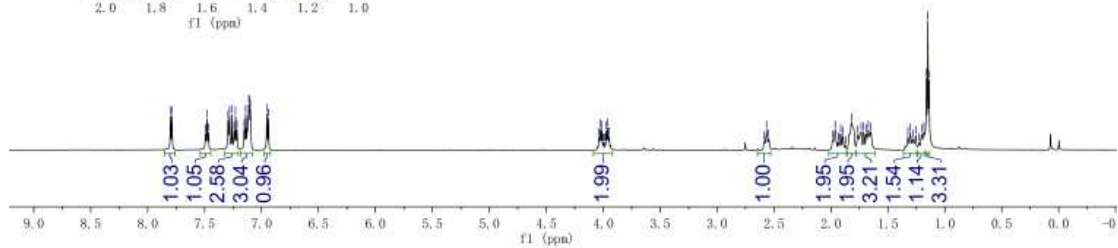

160.08  
154.65  
142.50  
136.31  
130.48  
129.57  
124.61  
122.12  
121.90  
120.97  
118.88  
113.39  
109.98

77.24  
77.03  
76.82

64.08

36.55  
32.44  
31.05  
26.23  
25.75

14.44

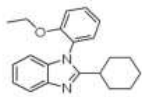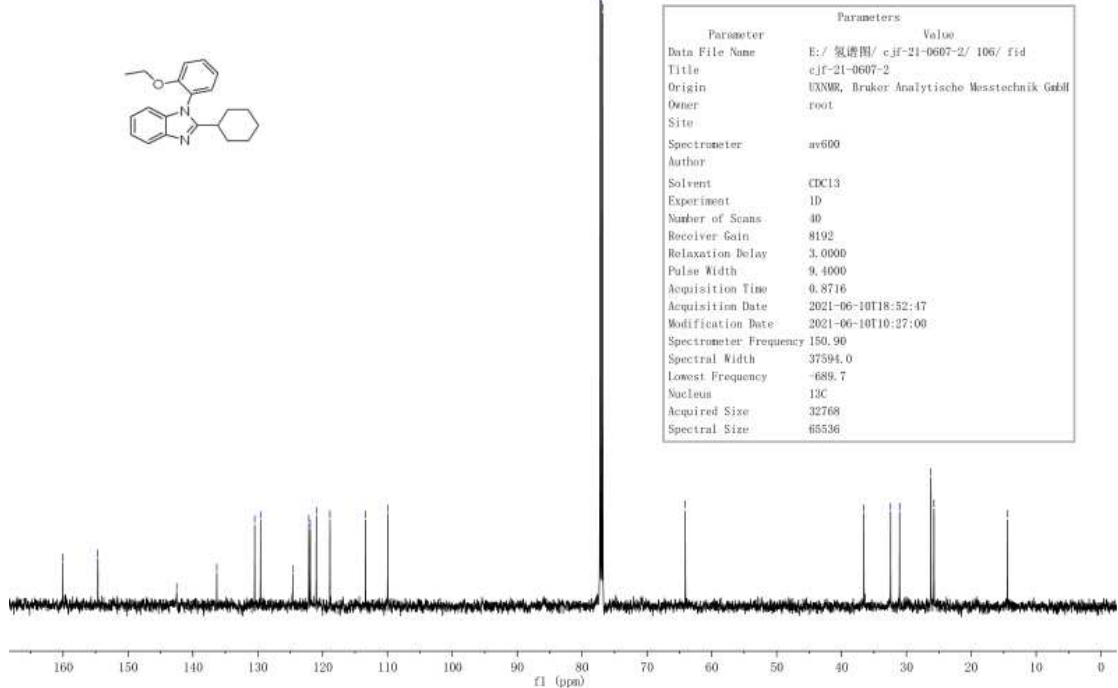

| Parameter              | Value                                     |
|------------------------|-------------------------------------------|
| Data File Name         | E:/ 氮谱图/ cjf-21-0607-2/ 106/ fid          |
| Title                  | cjf-21-0607-2                             |
| Origin                 | UXNM, Bruker Analytische Messtechnik GmbH |
| Owner                  | root                                      |
| Site                   |                                           |
| Spectrometer           | av600                                     |
| Author                 |                                           |
| Solvent                | CDCl3                                     |
| Experiment             | 1D                                        |
| Number of Scans        | 40                                        |
| Receiver Gain          | 8192                                      |
| Relaxation Delay       | 3.0000                                    |
| Pulse Width            | 9.4000                                    |
| Acquisition Time       | 0.8716                                    |
| Acquisition Date       | 2021-06-10T18:52:47                       |
| Modification Date      | 2021-06-10T10:27:00                       |
| Spectrometer Frequency | 150.90                                    |
| Spectral Width         | 37594.0                                   |
| Lowest Frequency       | -689.7                                    |
| Nucleus                | 13C                                       |
| Acquired Size          | 32768                                     |
| Spectral Size          | 65536                                     |



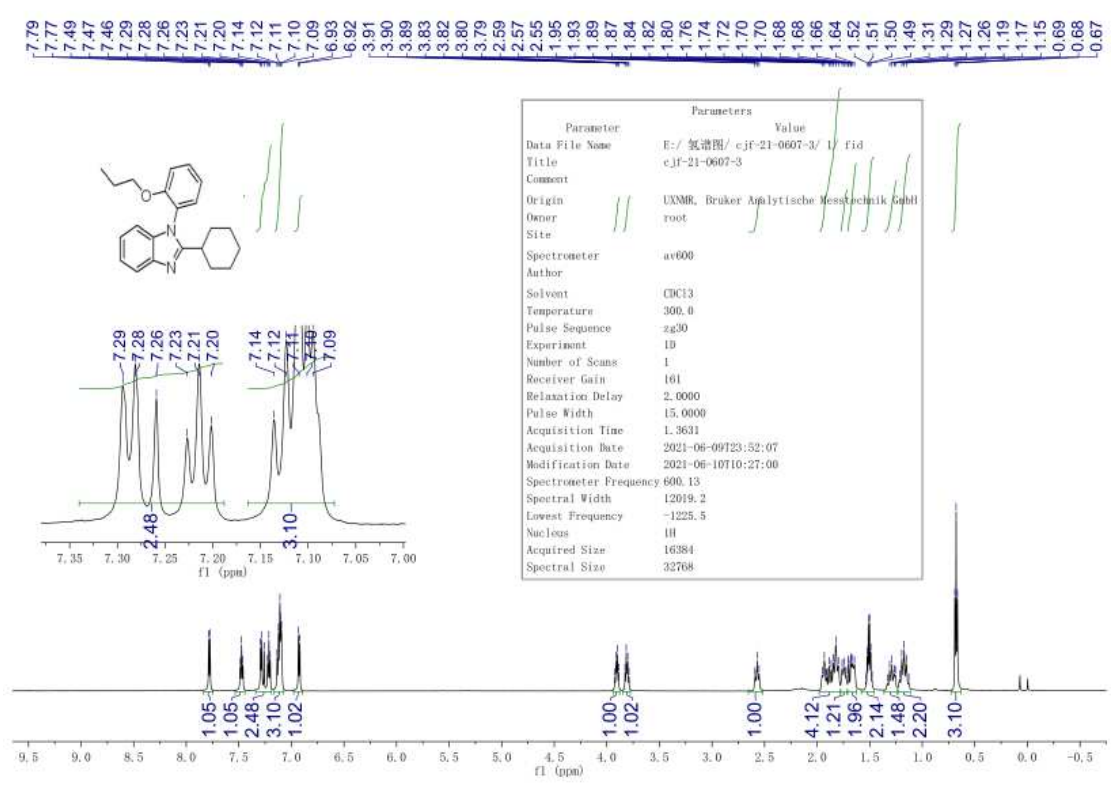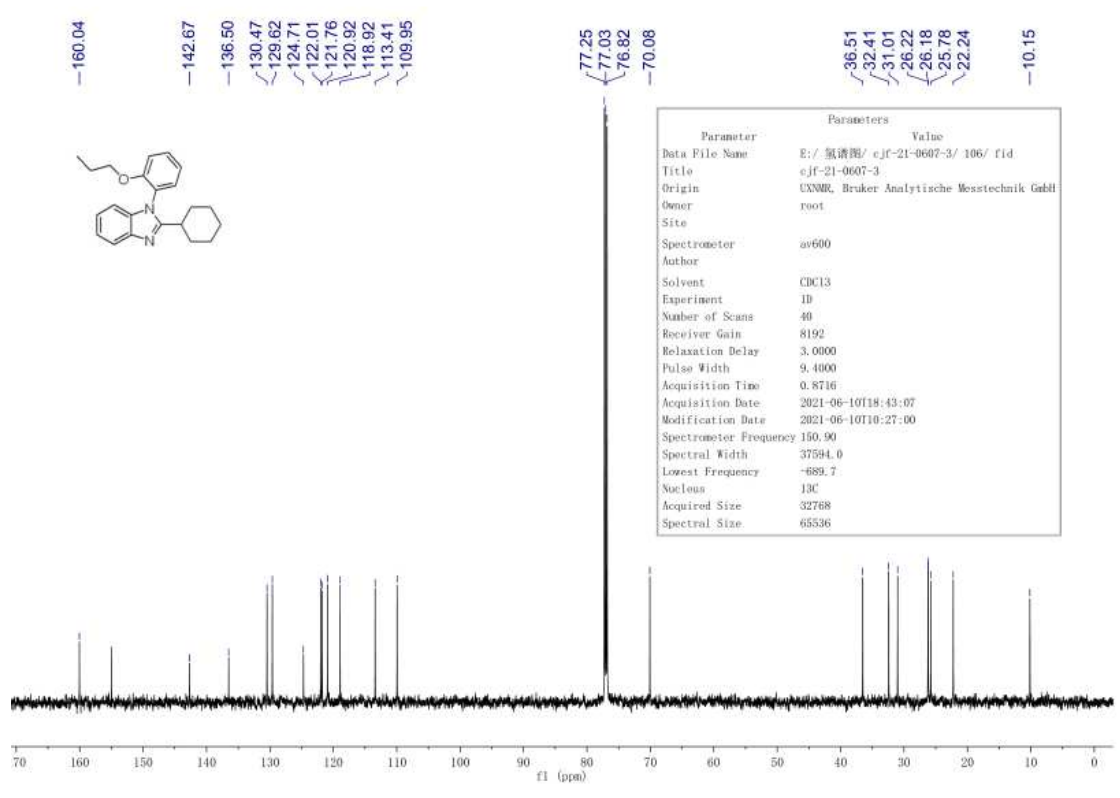

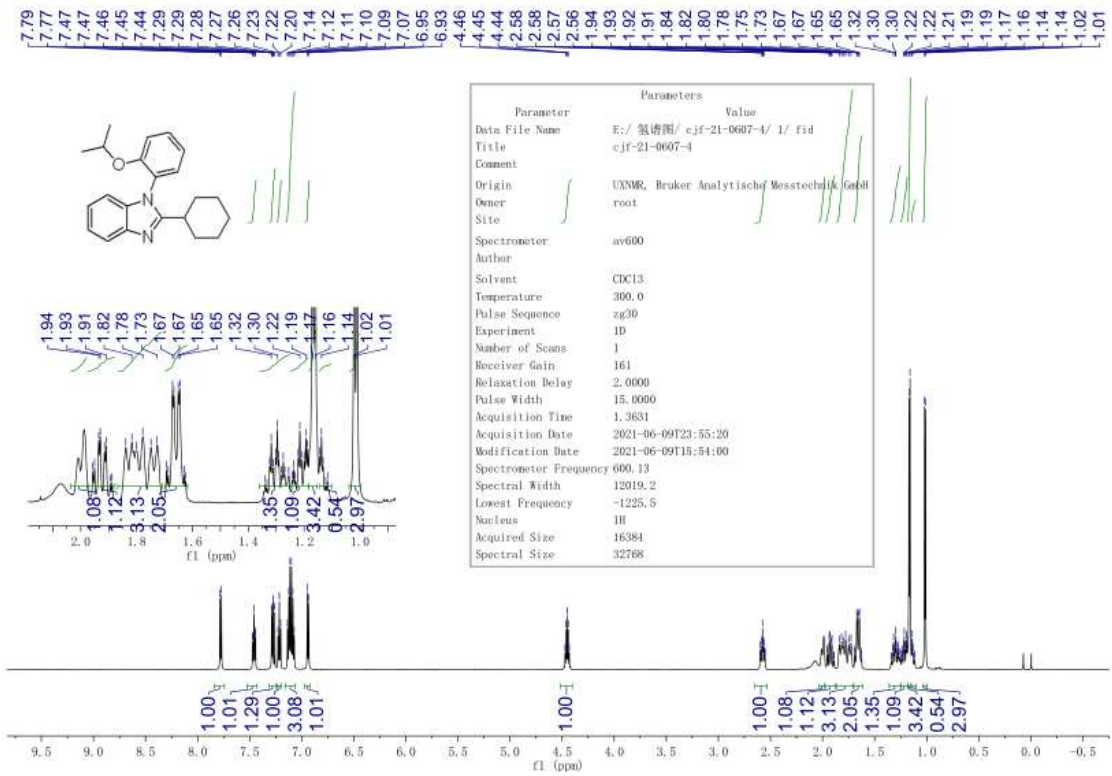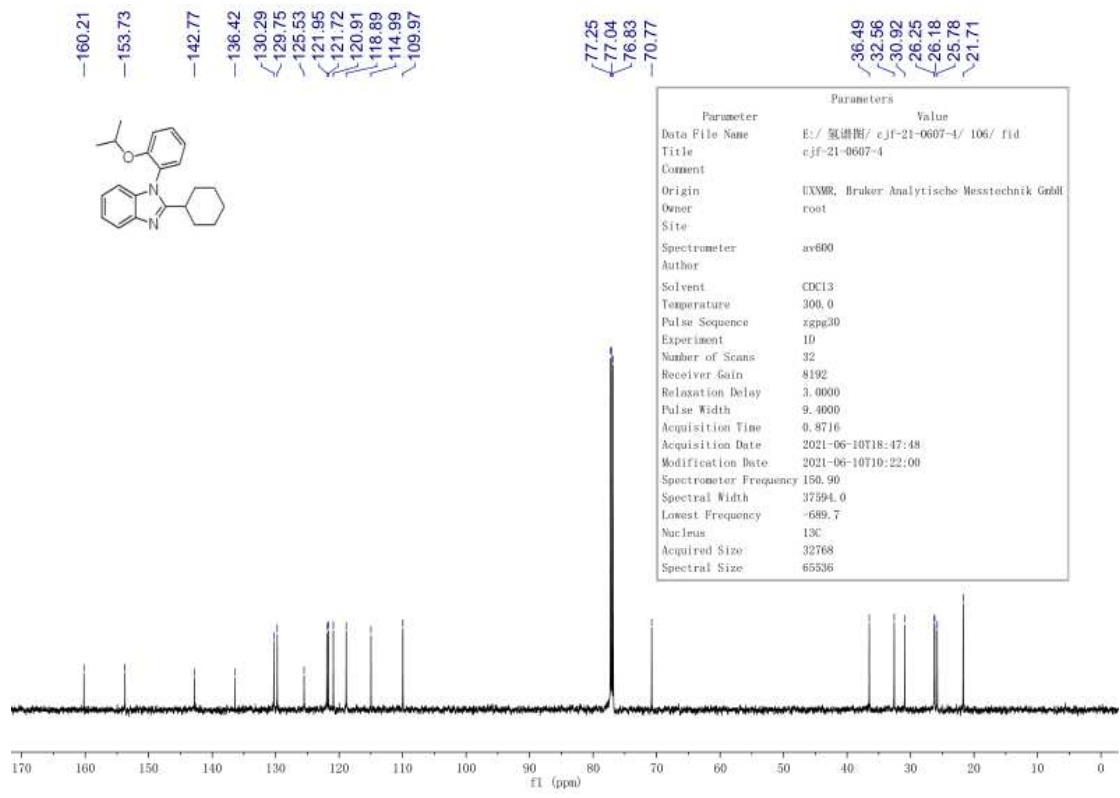

7.85  
7.51  
7.50  
7.49  
7.47  
7.46  
7.36  
7.36  
7.34  
7.34  
7.27  
7.27  
7.25  
7.24  
7.23  
7.19  
7.18  
7.16  
7.14  
7.08  
7.07  
7.06  
6.99  
6.98  
5.05  
5.04  
2.63  
1.93  
1.92  
1.91  
1.90  
1.88  
1.87  
1.86  
1.82  
1.80  
1.79  
1.77  
1.75  
1.74  
1.71  
1.71  
1.68  
1.67  
1.67  
1.34  
1.33  
1.32  
1.31  
1.30  
1.29  
1.28  
1.21  
1.20  
1.19  
1.18  
1.17

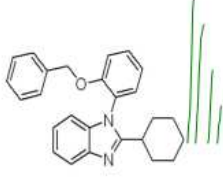

| Parameter              | Value                           |
|------------------------|---------------------------------|
| Data File Name         | E:/ 氢谱图/ cjt-21-0112-7/ 30/ fid |
| Title                  | cjt-21-0112-7                   |
| Comment                |                                 |
| Origin                 | Bruker BioSpin GmbH             |
| Owner                  | nur                             |
| Site                   |                                 |
| Spectrometer           | spect                           |
| Author                 |                                 |
| Solvent                | CDCl3                           |
| Temperature            | 295.2                           |
| Pulse Sequence         | zg30                            |
| Experiment             | 1D                              |
| Number of Scans        | 4                               |
| Receiver Gain          | 31                              |
| Relaxation Delay       | 1.0000                          |
| Pulse Width            | 9.9900                          |
| Acquisition Time       | 1.0891                          |
| Acquisition Date       | 2021-02-04T14:02:24             |
| Modification Date      | 2021-02-04T14:02:00             |
| Spectrometer Frequency | 400.13                          |
| Spectral Width         | 8012.8                          |
| Lowest Frequency       | -1535.4                         |
| Nucleus                | 1H                              |
| Acquired Size          | 32768                           |
| Spectral Size          | 65536                           |

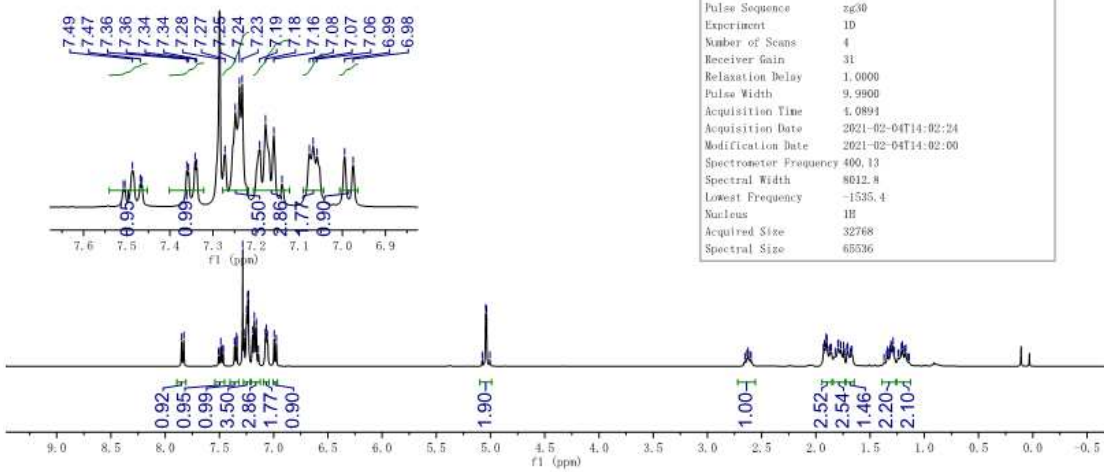

160.09  
154.46  
142.71  
136.46  
136.06  
130.55  
129.80  
128.50  
127.92  
126.75  
124.98  
122.18  
121.94  
121.52  
119.05  
114.20  
110.02

77.40  
77.29  
77.08  
76.76  
70.31  
36.55  
32.53  
31.02  
26.25  
26.20  
25.78

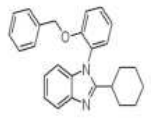

| Parameter              | Value                           |
|------------------------|---------------------------------|
| Data File Name         | E:/ 氢谱图/ cjt-21-0112-7/ 40/ fid |
| Title                  | cjt-21-0112-7                   |
| Comment                |                                 |
| Origin                 | Bruker BioSpin GmbH             |
| Owner                  | nur                             |
| Site                   |                                 |
| Spectrometer           | spect                           |
| Author                 |                                 |
| Solvent                | CDCl3                           |
| Temperature            | 296.1                           |
| Pulse Sequence         | zgpg30                          |
| Experiment             | 1D                              |
| Number of Scans        | 256                             |
| Receiver Gain          | 198                             |
| Relaxation Delay       | 2.0000                          |
| Pulse Width            | 9.3100                          |
| Acquisition Time       | 1.3631                          |
| Acquisition Date       | 2021-02-07T20:45:17             |
| Modification Date      | 2021-02-07T20:45:00             |
| Spectrometer Frequency | 100.61                          |
| Spectral Width         | 24038.5                         |
| Lowest Frequency       | -1958.4                         |
| Nucleus                | 13C                             |
| Acquired Size          | 32768                           |
| Spectral Size          | 65536                           |

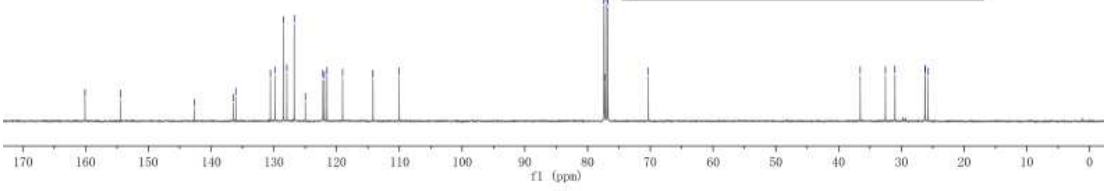

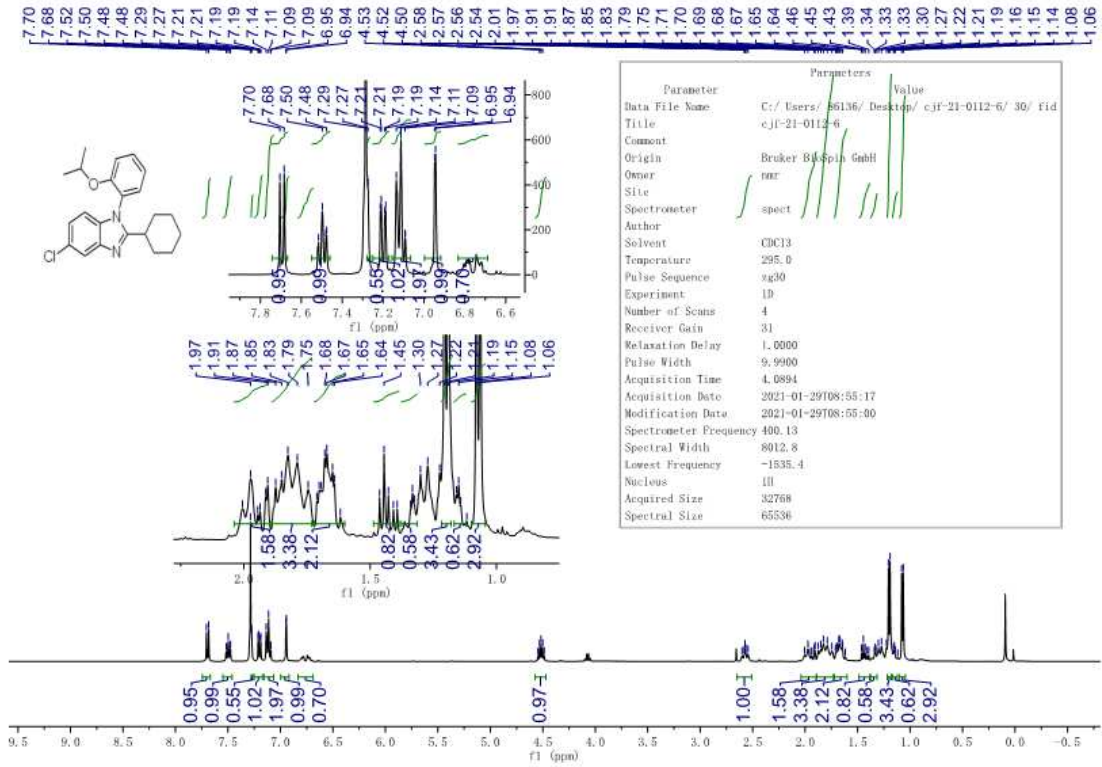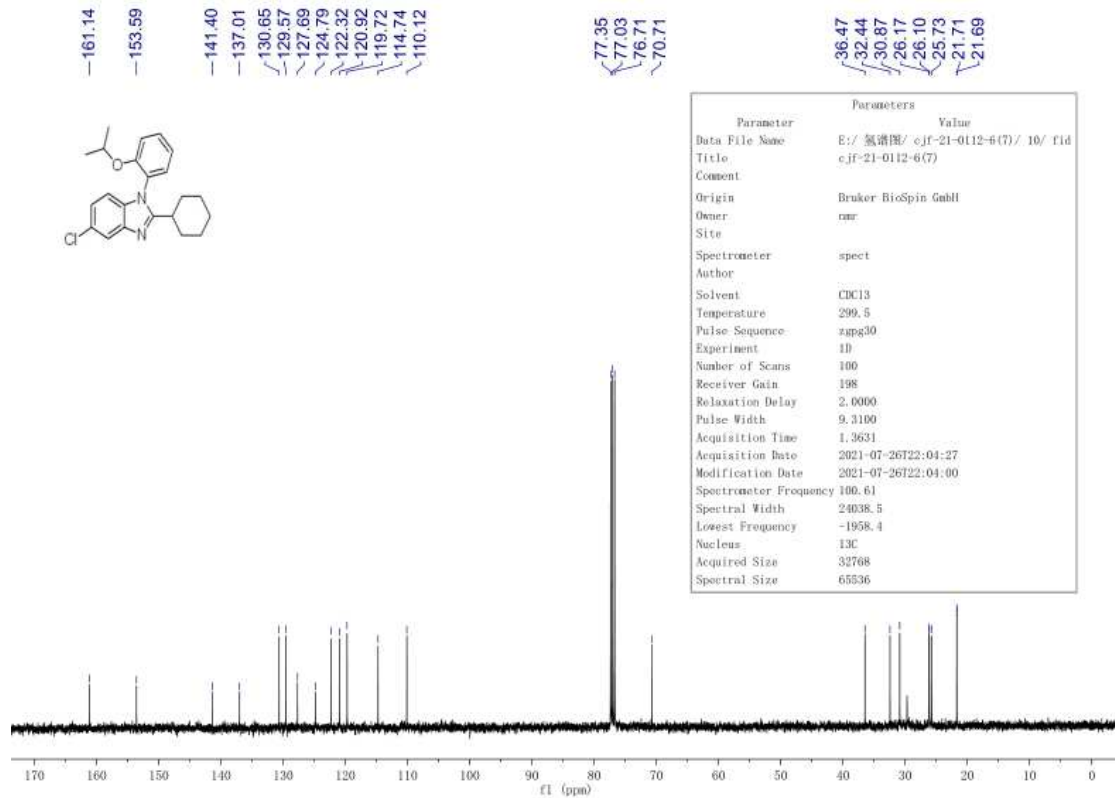

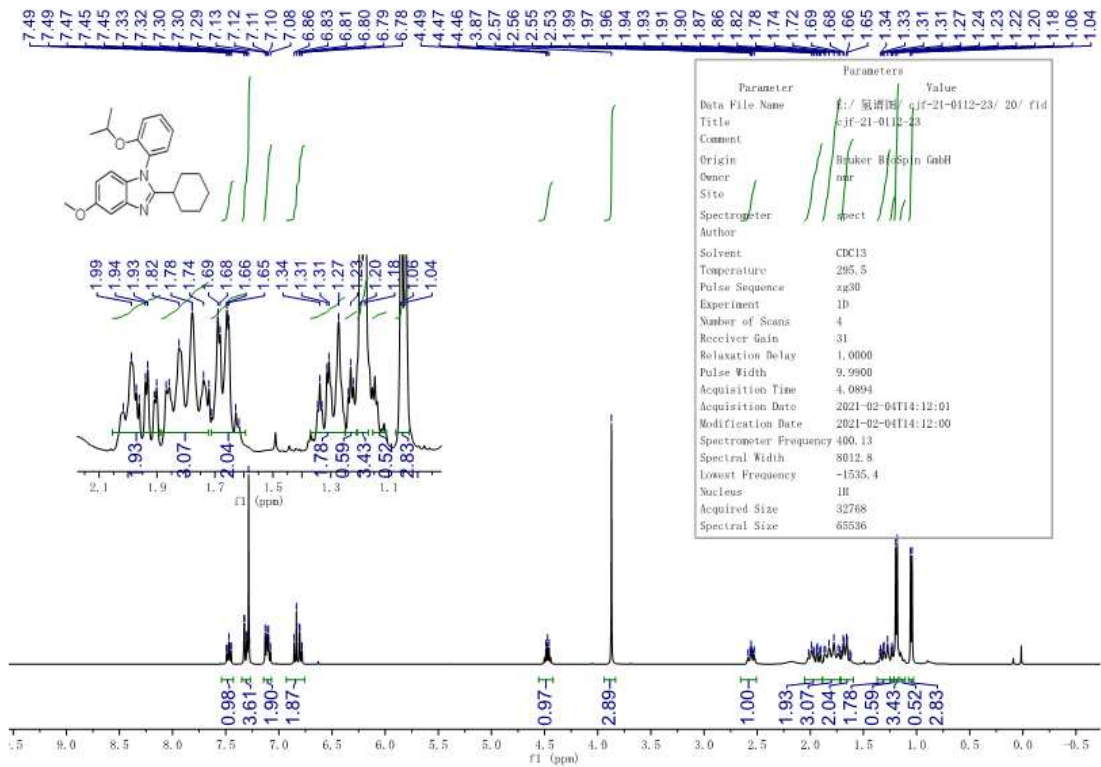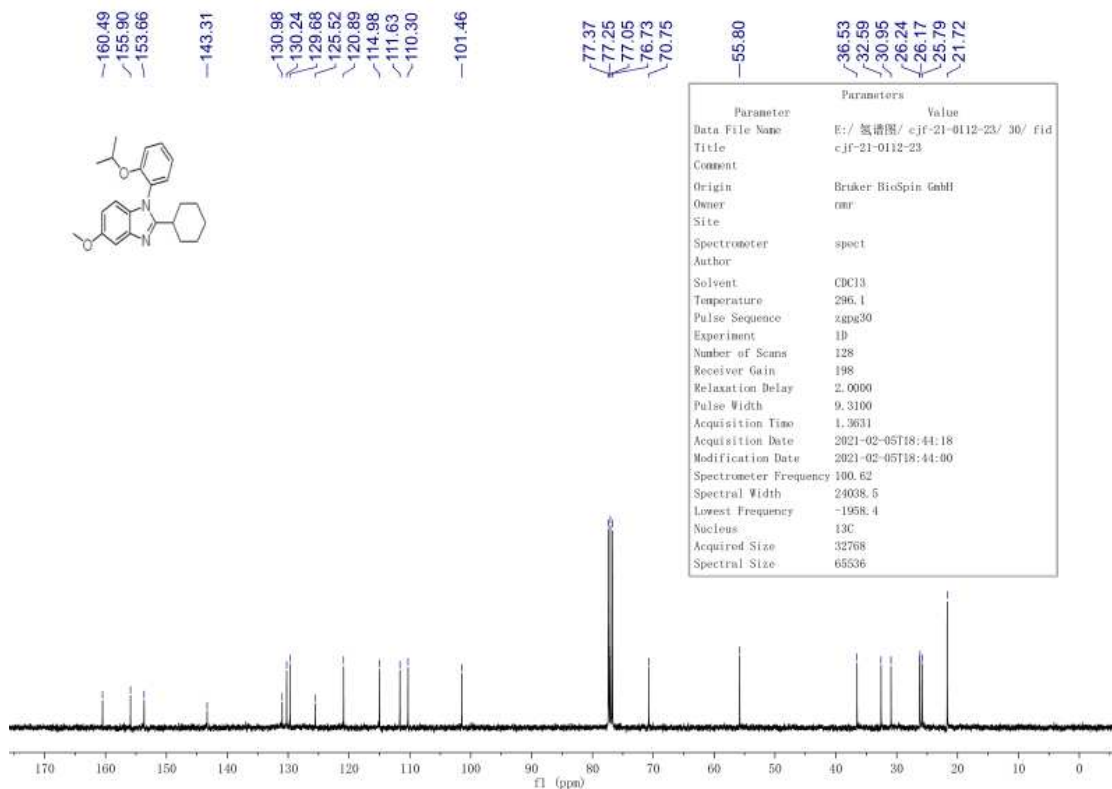



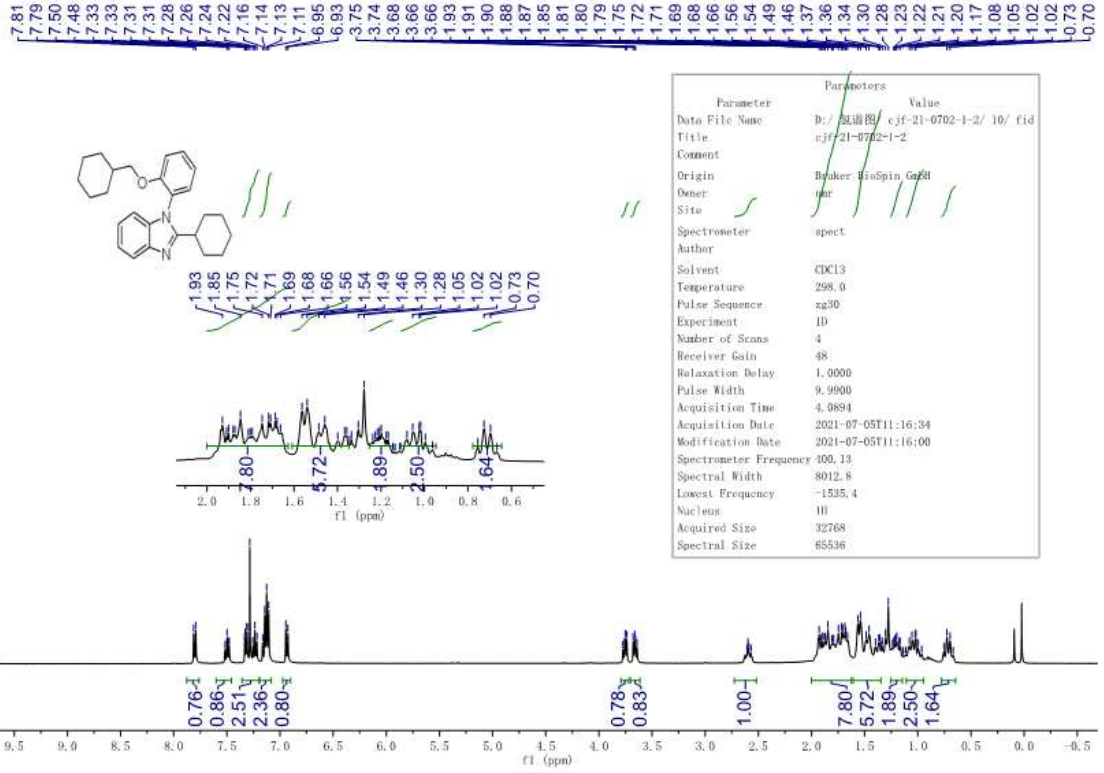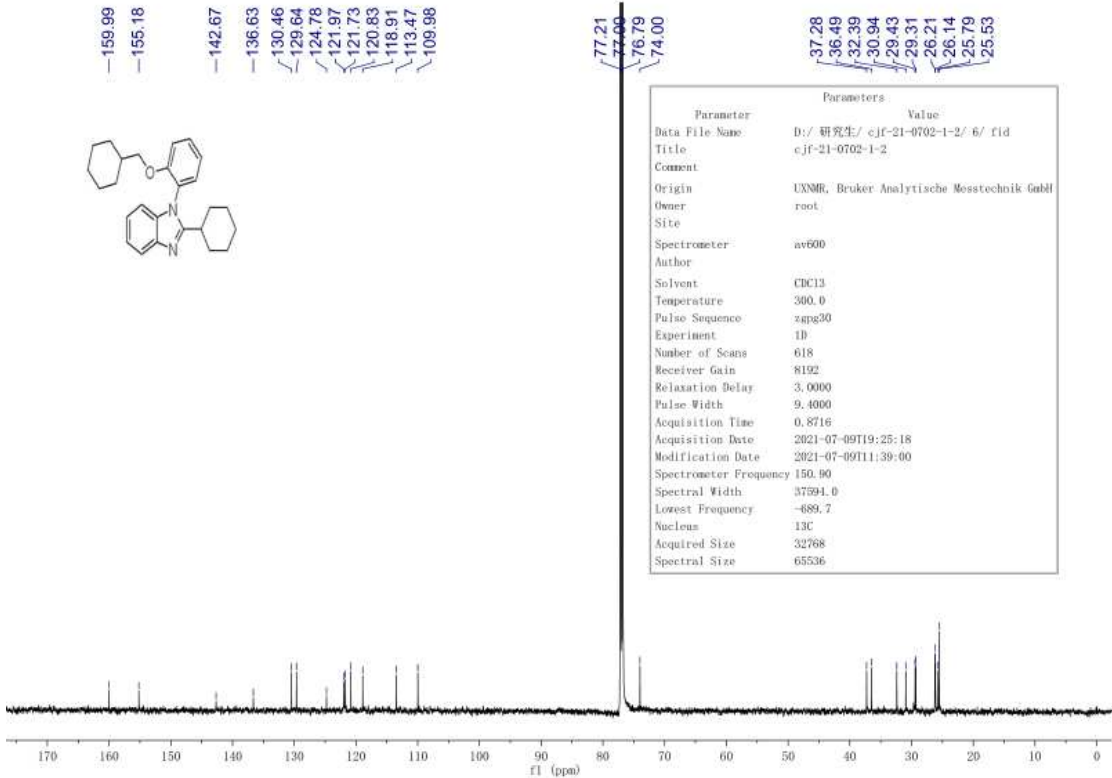

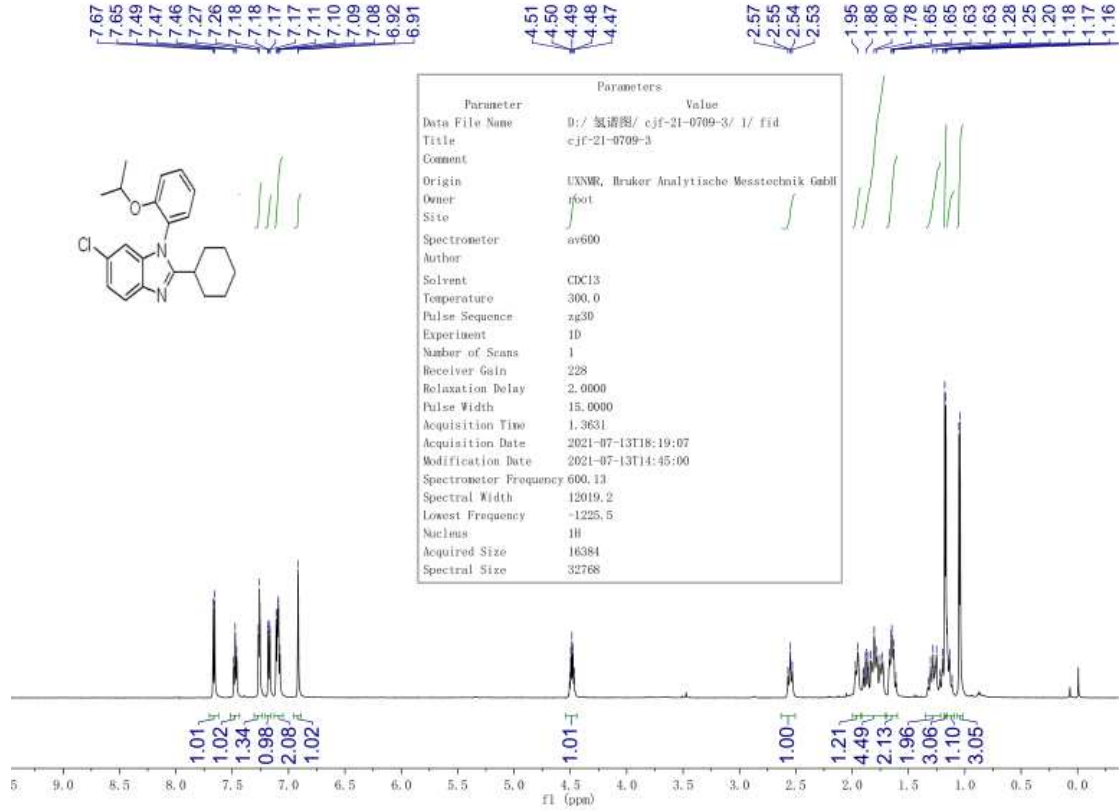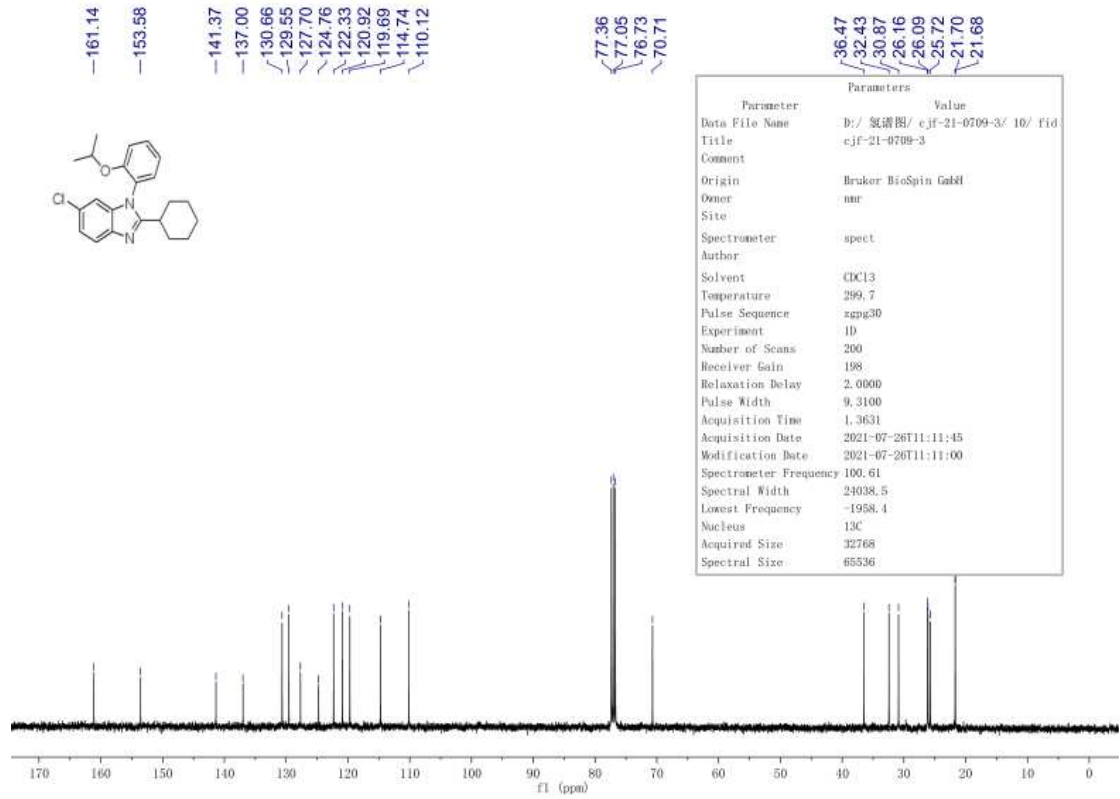

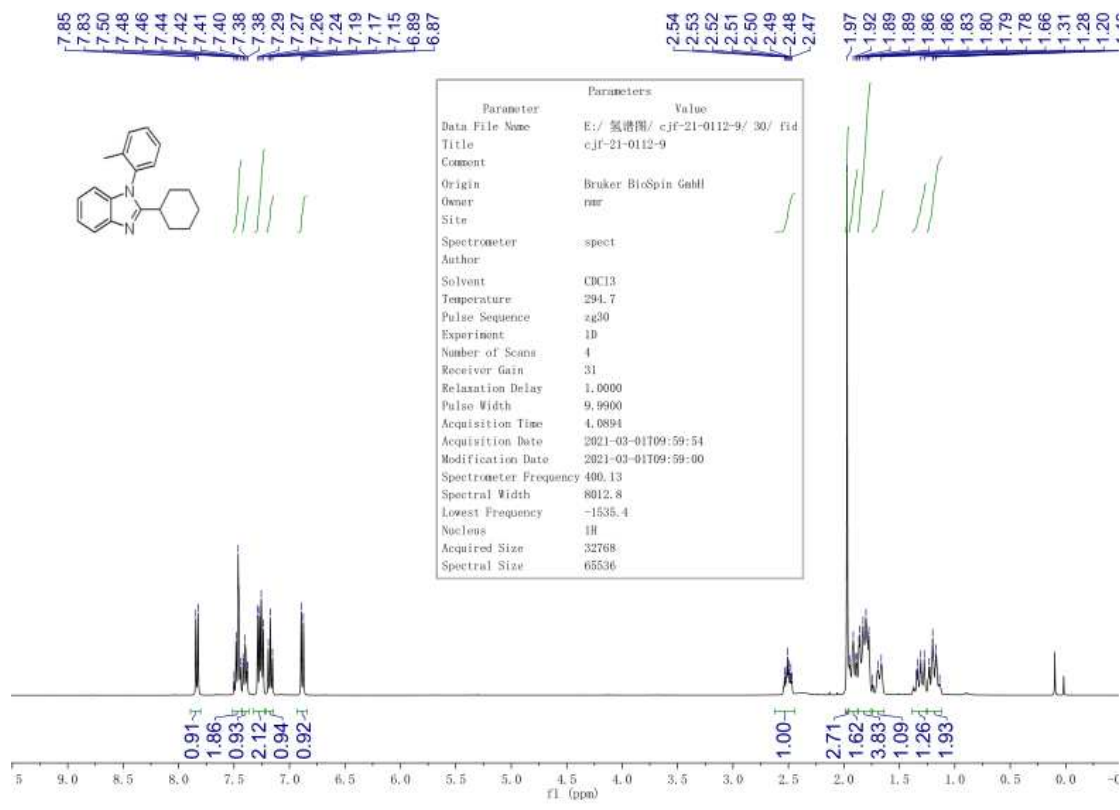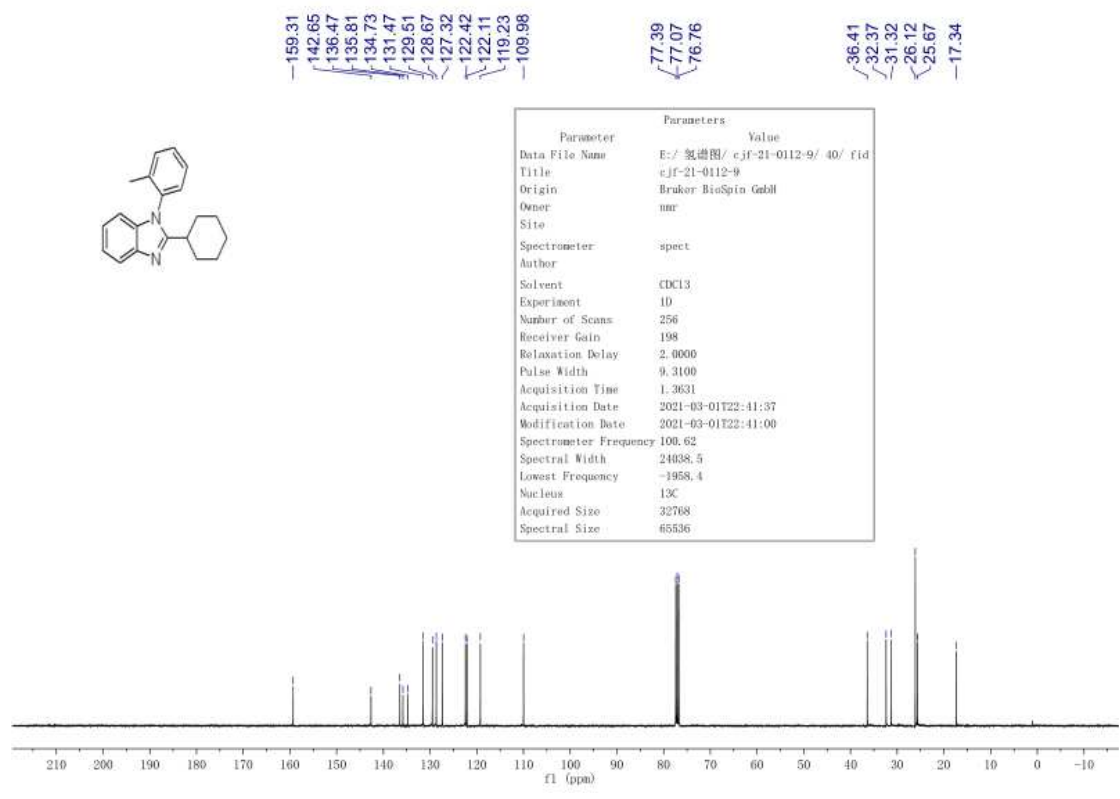



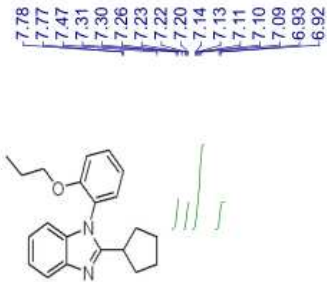

2.12  
2.11  
1.92  
1.91  
1.89  
1.88  
1.85  
1.56  
1.54  
1.53  
1.52  
1.50  
1.49  
0.68  
0.66

| Parameter              | Value                                     |
|------------------------|-------------------------------------------|
| Data File Name         | D:/ 氢谱图/ cjf-0615-4-s/ 1/ fid             |
| Title                  | cjf-0615-4-s                              |
| Comment                |                                           |
| Origin                 | UXMR, Bruker Analytische Messtechnik GmbH |
| Owner                  | root                                      |
| Site                   |                                           |
| Spectrometer           | av600                                     |
| Author                 |                                           |
| Solvent                | CDCl3                                     |
| Temperature            | 300.0                                     |
| Pulse Sequence         | zg30                                      |
| Experiment             | 1D                                        |
| Number of Scans        | 1                                         |
| Receiver Gain          | 575                                       |
| Relaxation Delay       | 2.0000                                    |
| Pulse Width            | 15.0000                                   |
| Acquisition Time       | 1.3631                                    |
| Acquisition Date       | 2021-06-17T19:05:54                       |
| Modification Date      | 2021-06-17T10:37:00                       |
| Spectrometer Frequency | 600.13                                    |
| Spectral Width         | 12019.2                                   |
| Lowest Frequency       | -1225.5                                   |
| Nucleus                | 1H                                        |
| Acquired Size          | 16384                                     |
| Spectral Size          | 32768                                     |

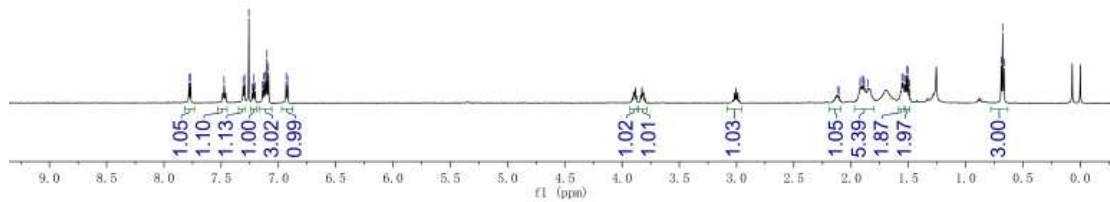

160.01  
155.14  
136.86  
130.48  
129.77  
124.91  
121.98  
121.75  
120.85  
118.86  
113.34  
109.85

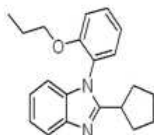

| Parameter              | Value                                     |
|------------------------|-------------------------------------------|
| Data File Name         | D:/ 氢谱图/ cjf-21-0615-4-s/ 106/ fid        |
| Title                  | cjf-21-0615-4-s                           |
| Comment                |                                           |
| Origin                 | UXMR, Bruker Analytische Messtechnik GmbH |
| Owner                  | root                                      |
| Site                   |                                           |
| Spectrometer           | av600                                     |
| Author                 |                                           |
| Solvent                | CDCl3                                     |
| Temperature            | 300.0                                     |
| Pulse Sequence         | zgpg30                                    |
| Experiment             | 1D                                        |
| Number of Scans        | 288                                       |
| Receiver Gain          | 8192                                      |
| Relaxation Delay       | 3.0000                                    |
| Pulse Width            | 9.4000                                    |
| Acquisition Time       | 0.8716                                    |
| Acquisition Date       | 2021-06-22T00:46:29                       |
| Modification Date      | 2021-06-21T17:04:00                       |
| Spectrometer Frequency | 150.90                                    |
| Spectral Width         | 37594.0                                   |
| Lowest Frequency       | -689.7                                    |
| Nucleus                | 13C                                       |
| Acquired Size          | 32768                                     |
| Spectral Size          | 65536                                     |

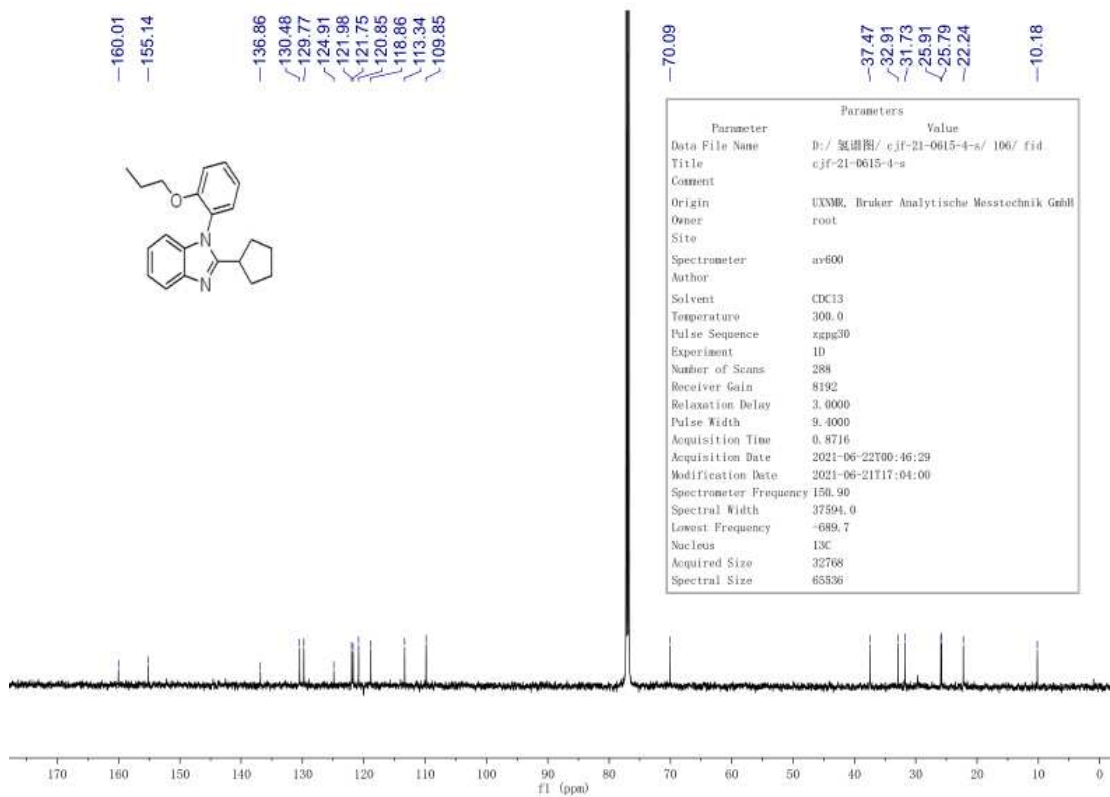

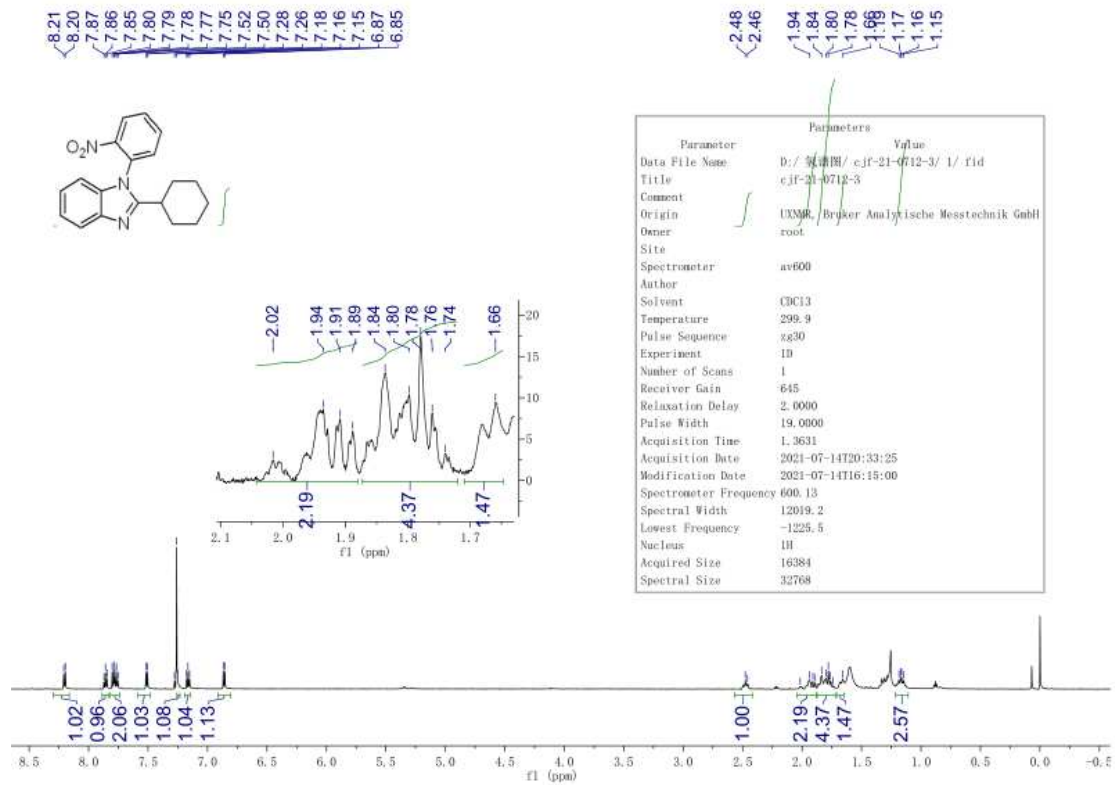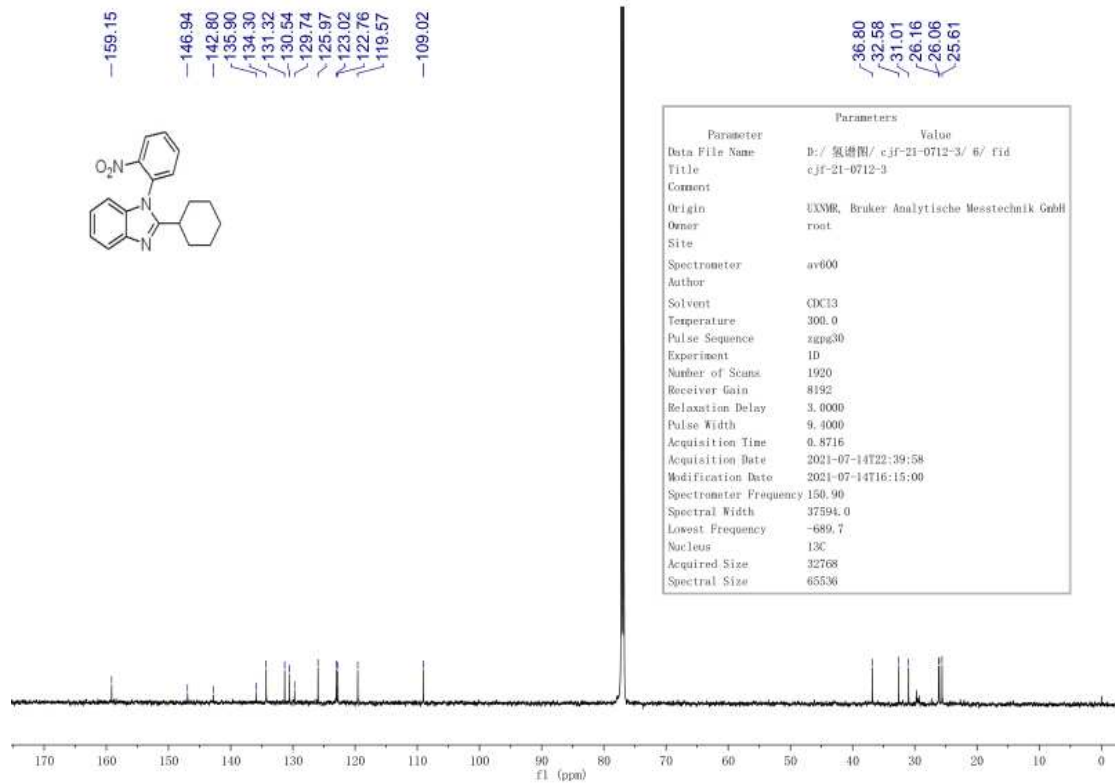

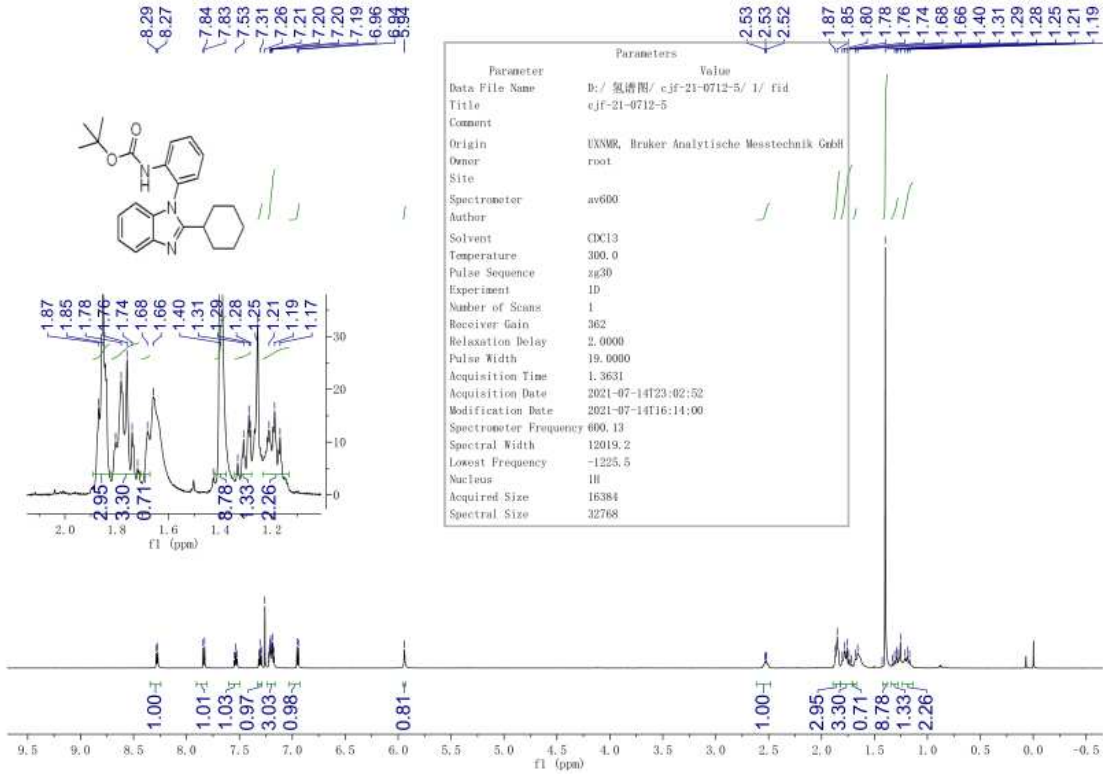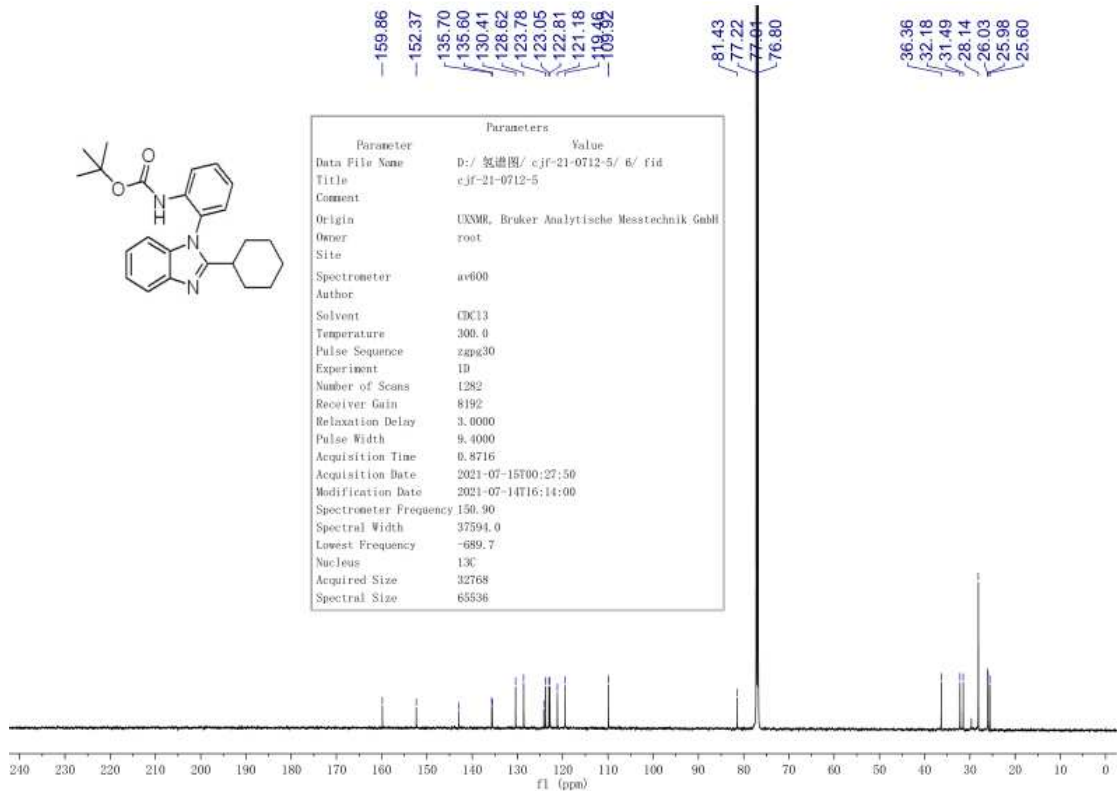

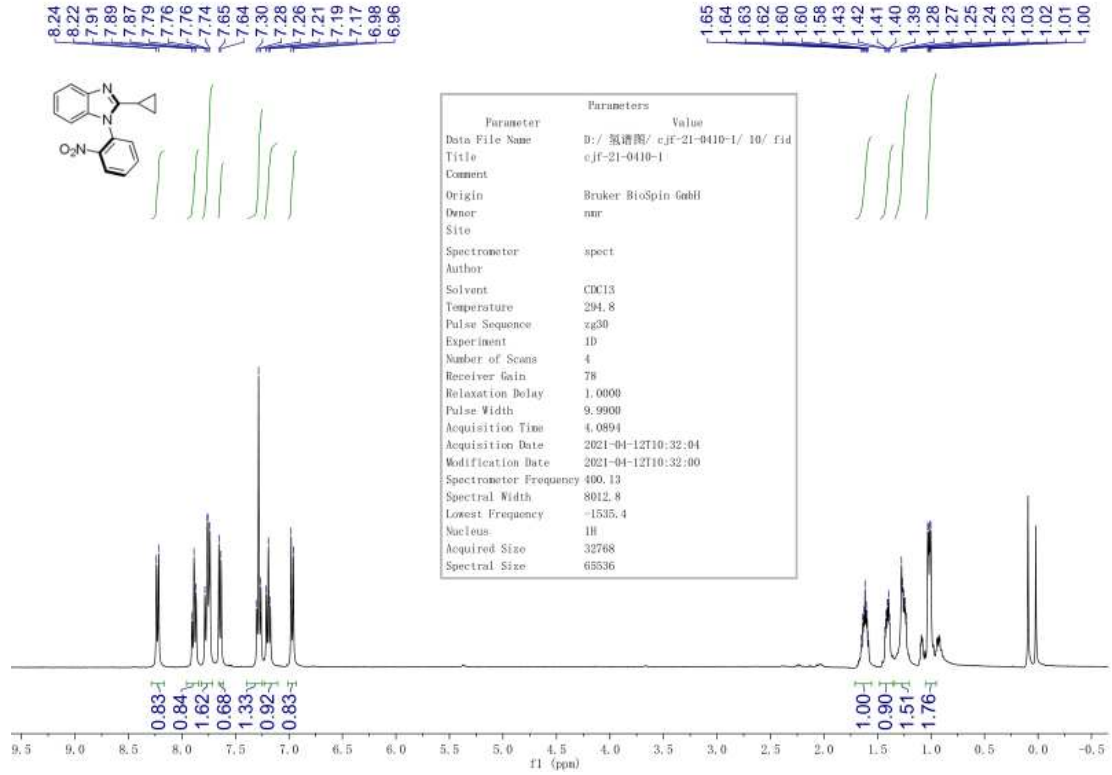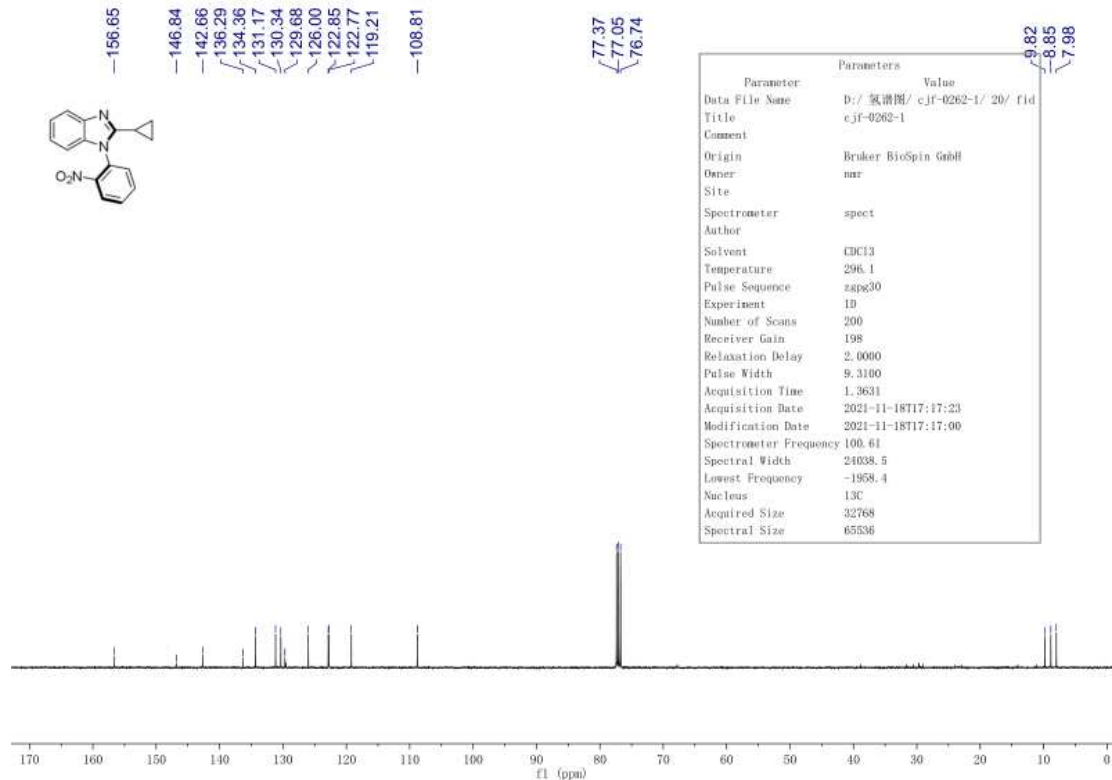

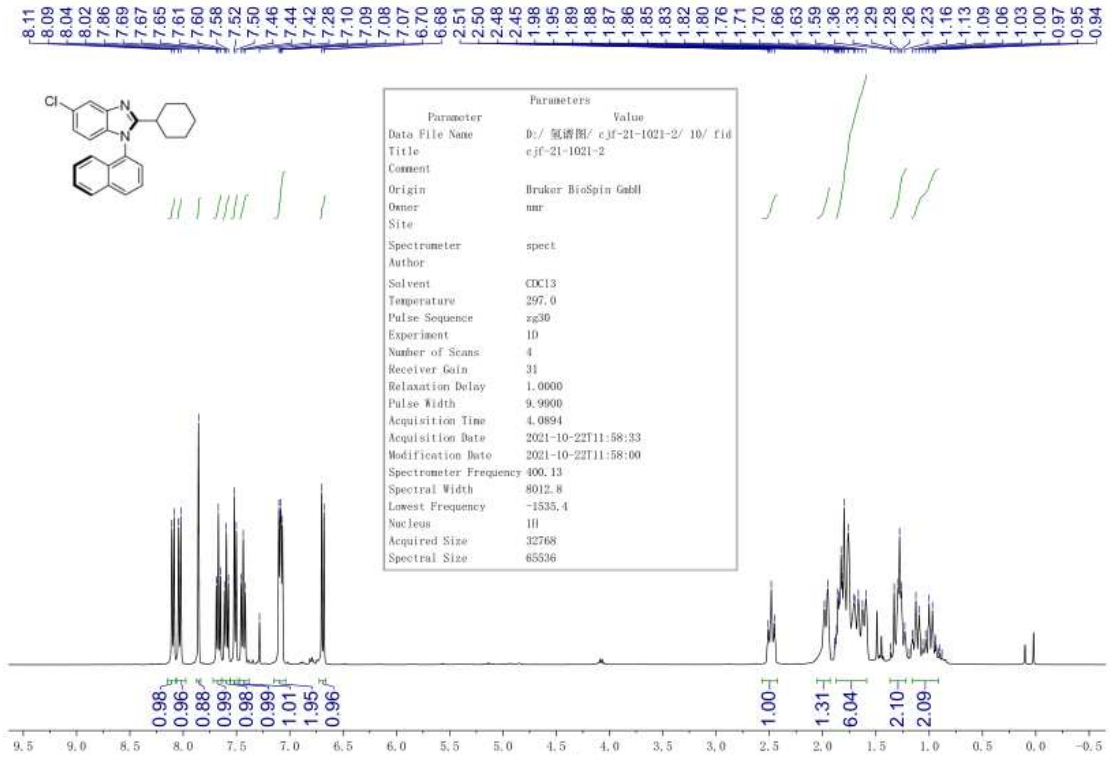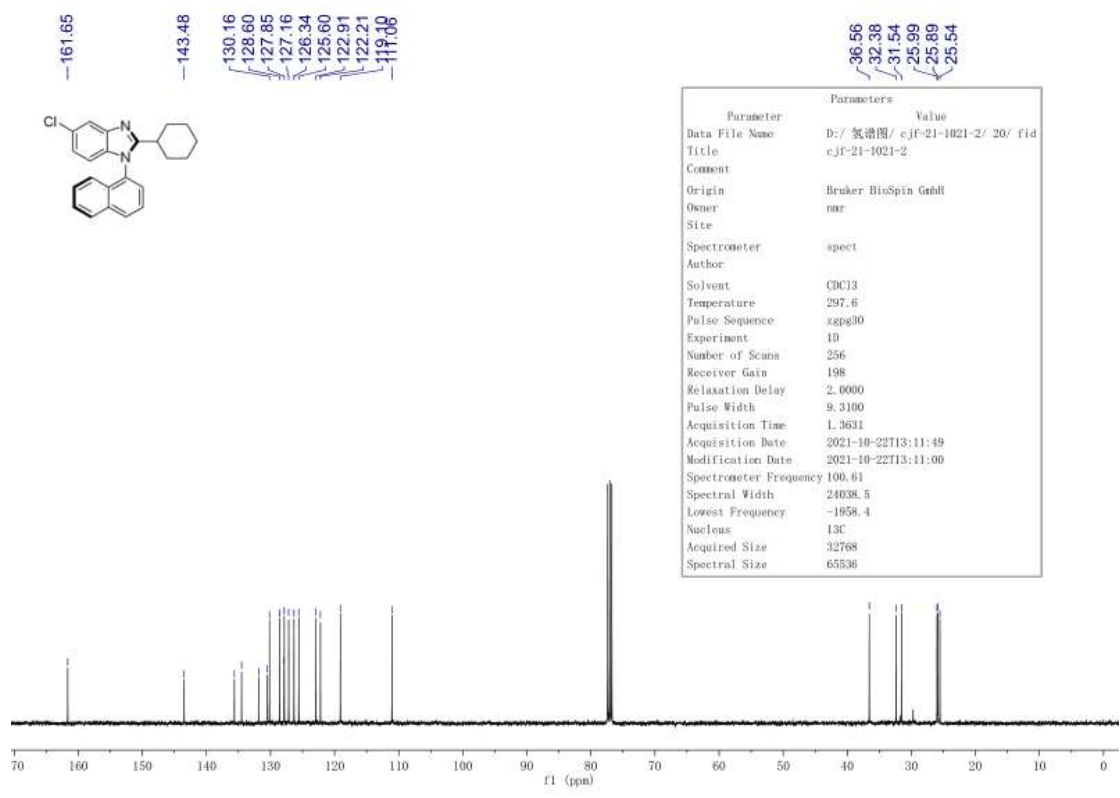

8.11  
8.09  
8.04  
8.02  
7.87  
7.69  
7.67  
7.65  
7.60  
7.58  
7.54  
7.52  
7.47  
7.45  
7.28  
7.12  
7.10  
6.74  
6.72

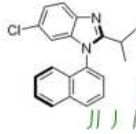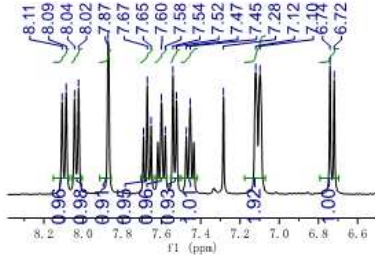

2.88  
2.87  
2.85  
2.83  
2.81

1.37  
1.36  
1.27  
1.25

| Parameter              | Value                        |
|------------------------|------------------------------|
| Data File Name         | D:/ 氢谱图/ cjf-0244-3/ 10/ fid |
| Title                  | cjf-0244-3                   |
| Comment                |                              |
| Origin                 | Bruker BioSpin GmbH          |
| Owner                  | mr                           |
| Site                   |                              |
| Spectrometer           | spect                        |
| Author                 |                              |
| Solvent                | CDCl3                        |
| Temperature            | 297.4                        |
| Pulse Sequence         | zg30                         |
| Experiment             | 10                           |
| Number of Scans        | 4                            |
| Receiver Gain          | 63                           |
| Relaxation Delay       | 1.0000                       |
| Pulse Width            | 9.9900                       |
| Acquisition Time       | 4.0894                       |
| Acquisition Date       | 2021-10-19T11:23:38          |
| Modification Date      | 2021-10-19T11:23:08          |
| Spectrometer Frequency | 400.13                       |
| Spectral Width         | 8012.8                       |
| Lowest Frequency       | -1535.4                      |
| Nucleus                | 1H                           |
| Acquired Size          | 32768                        |
| Spectral Size          | 65536                        |

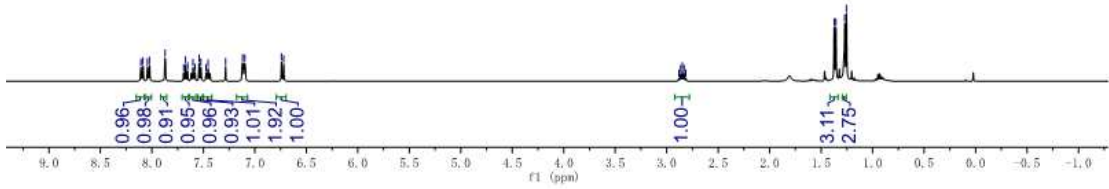

162.46  
143.41  
130.18  
128.60  
127.88  
127.18  
126.40  
125.59  
123.01  
122.19  
119.06

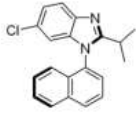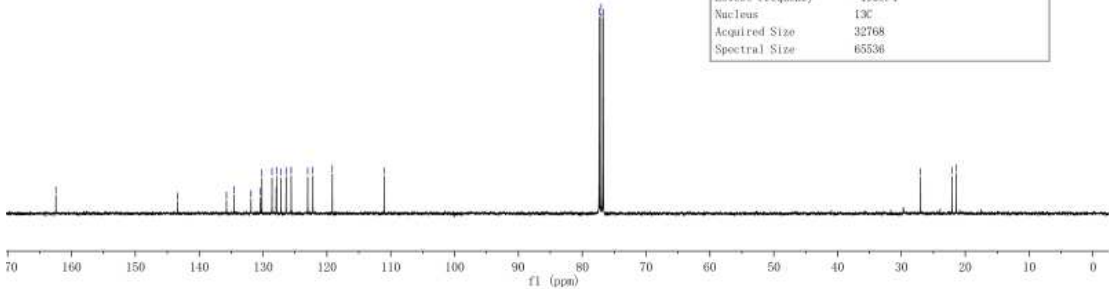

77.35  
77.04  
76.72

27.00  
22.08  
21.45

| Parameter              | Value                        |
|------------------------|------------------------------|
| Data File Name         | D:/ 氢谱图/ cjf-0244-3/ 11/ fid |
| Title                  | cjf-0244-3                   |
| Comment                |                              |
| Origin                 | Bruker BioSpin GmbH          |
| Owner                  | mr                           |
| Site                   |                              |
| Spectrometer           | spect                        |
| Author                 |                              |
| Solvent                | CDCl3                        |
| Temperature            | 298.1                        |
| Pulse Sequence         | zgpg30                       |
| Experiment             | 10                           |
| Number of Scans        | 256                          |
| Receiver Gain          | 198                          |
| Relaxation Delay       | 2.0000                       |
| Pulse Width            | 9.3100                       |
| Acquisition Time       | 1.3631                       |
| Acquisition Date       | 2021-10-19T11:44:11          |
| Modification Date      | 2021-10-19T11:44:00          |
| Spectrometer Frequency | 100.61                       |
| Spectral Width         | 24038.5                      |
| Lowest Frequency       | -1958.4                      |
| Nucleus                | 13C                          |
| Acquired Size          | 32768                        |
| Spectral Size          | 65536                        |



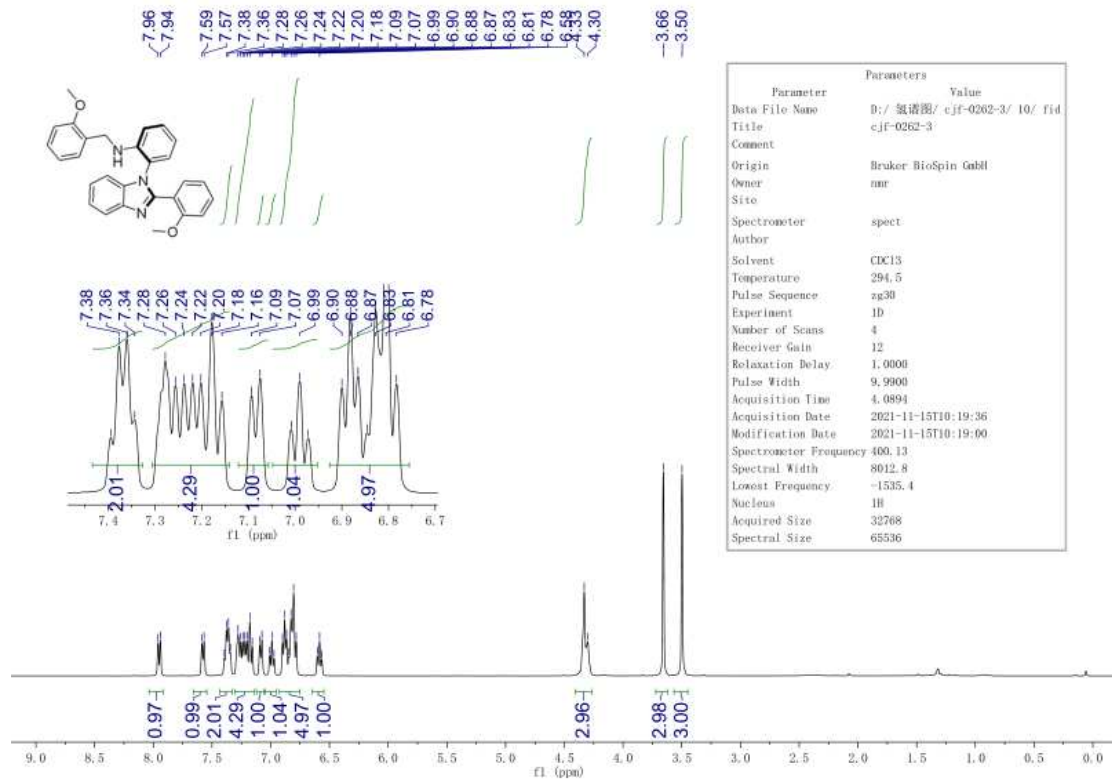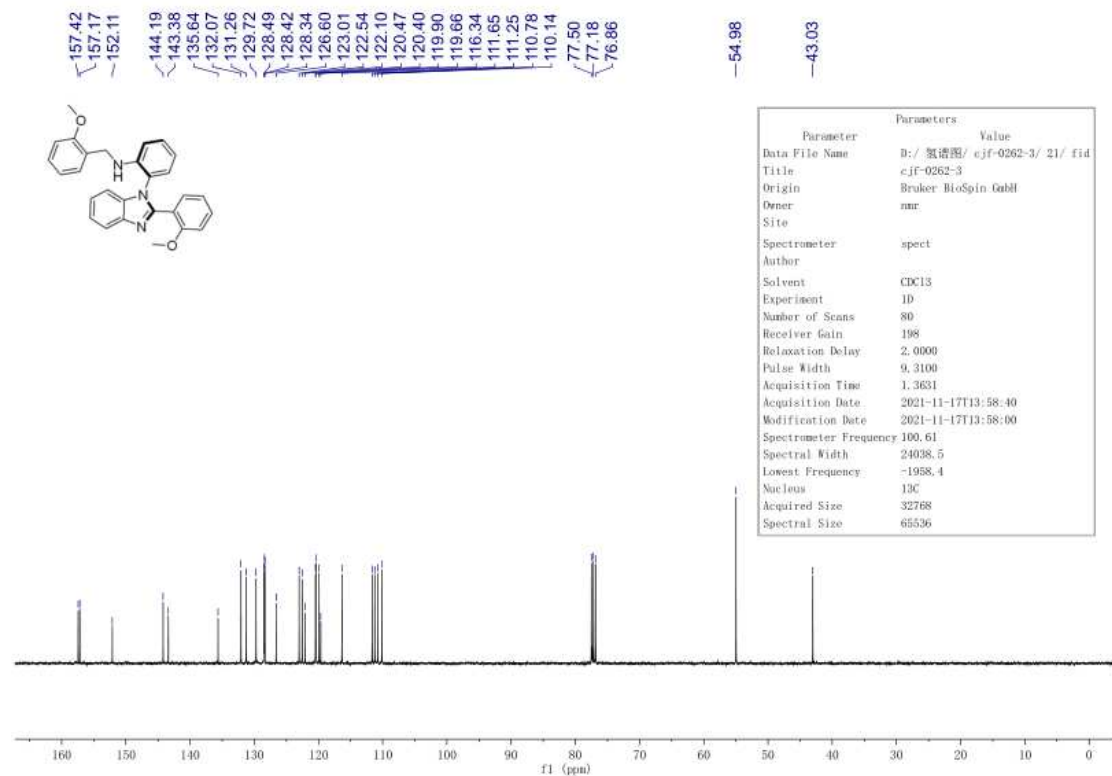

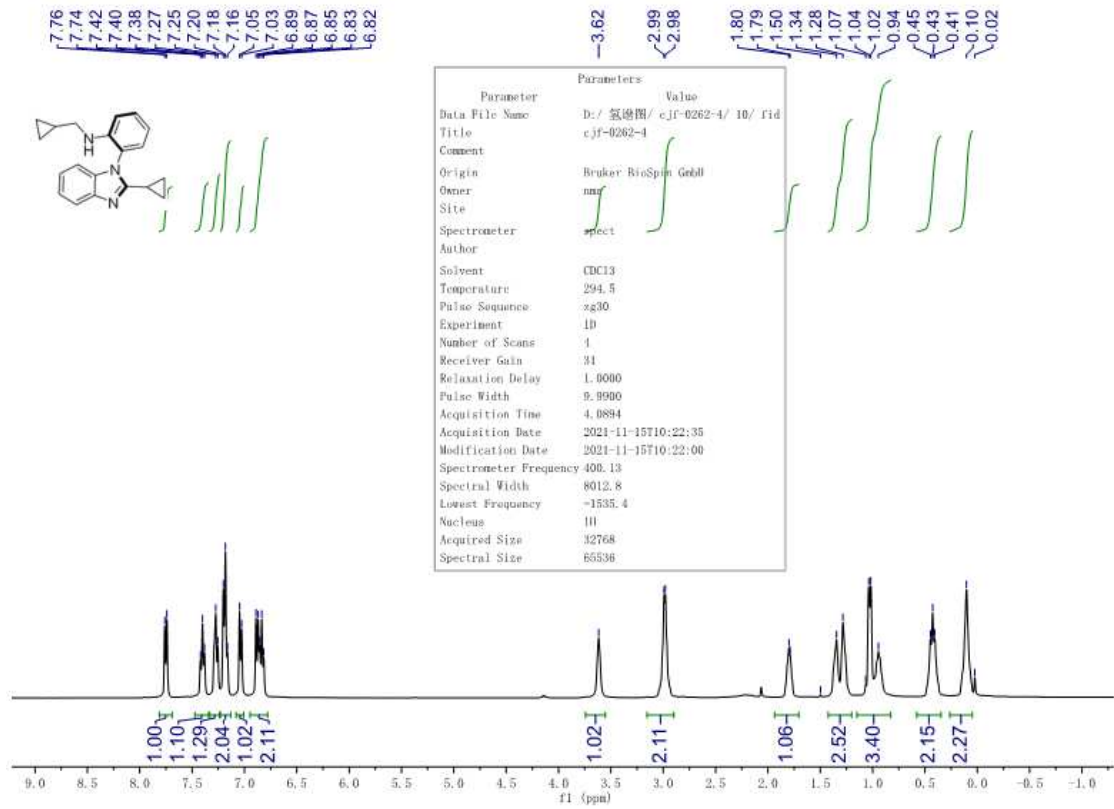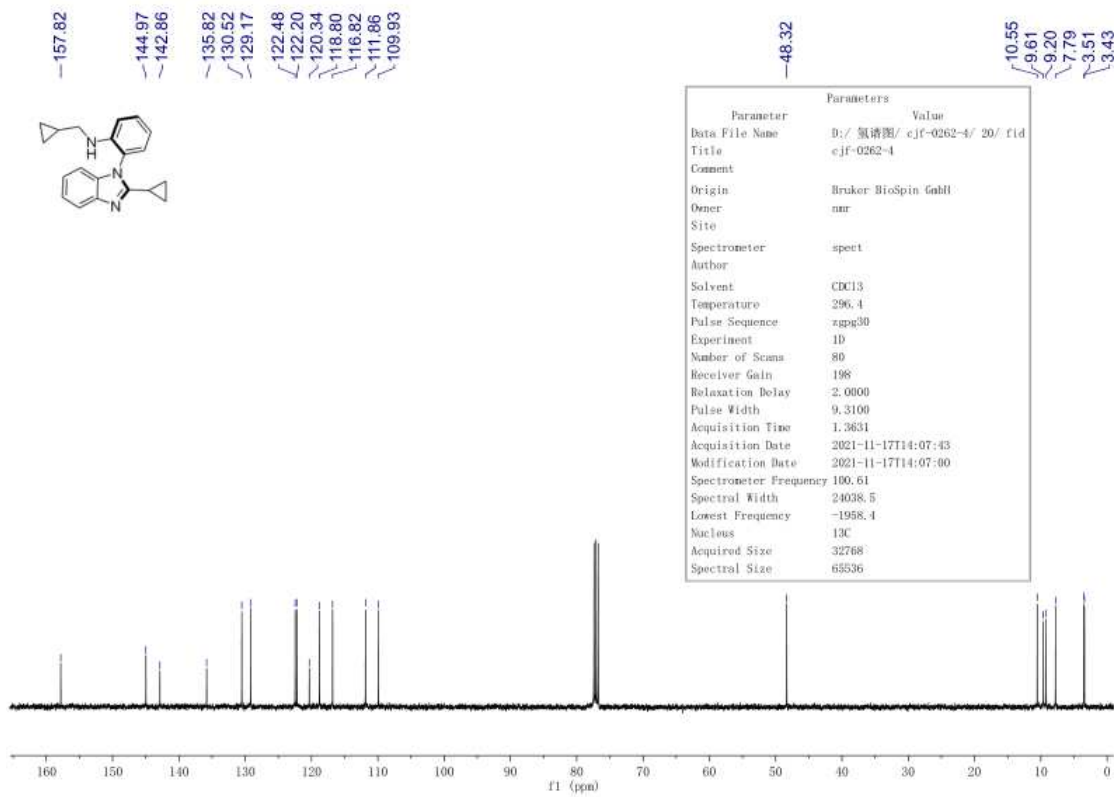



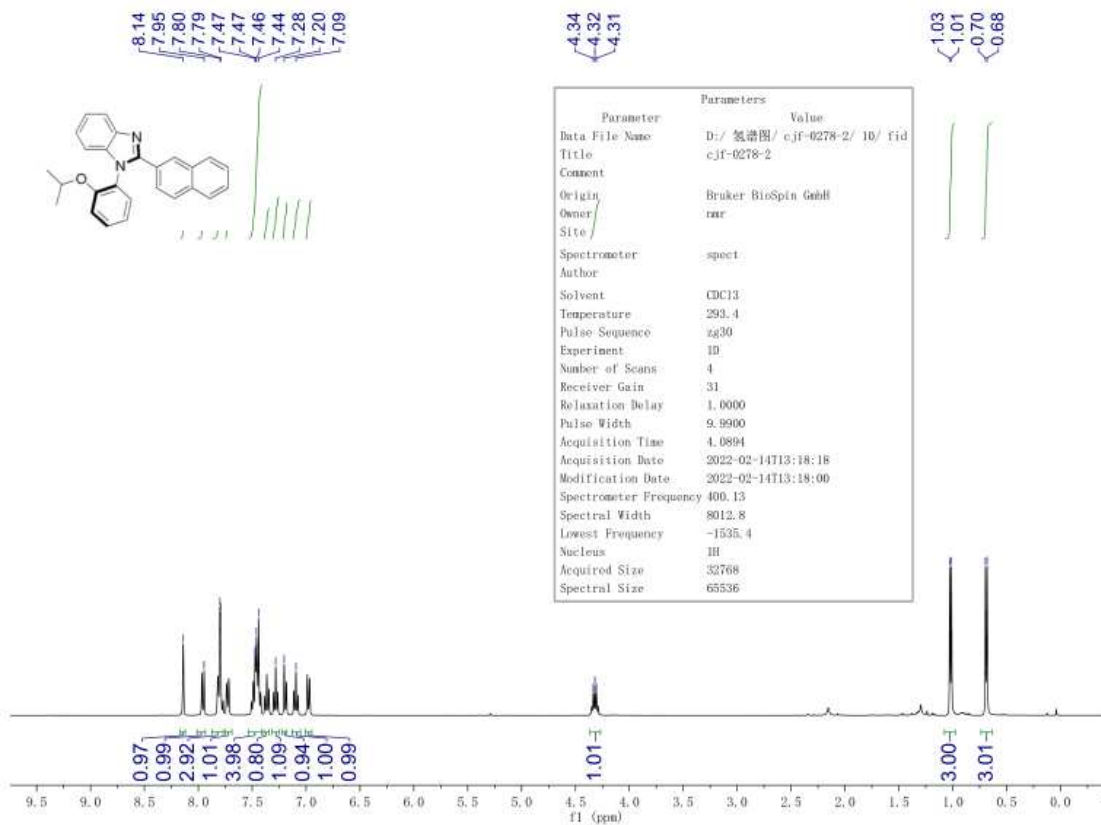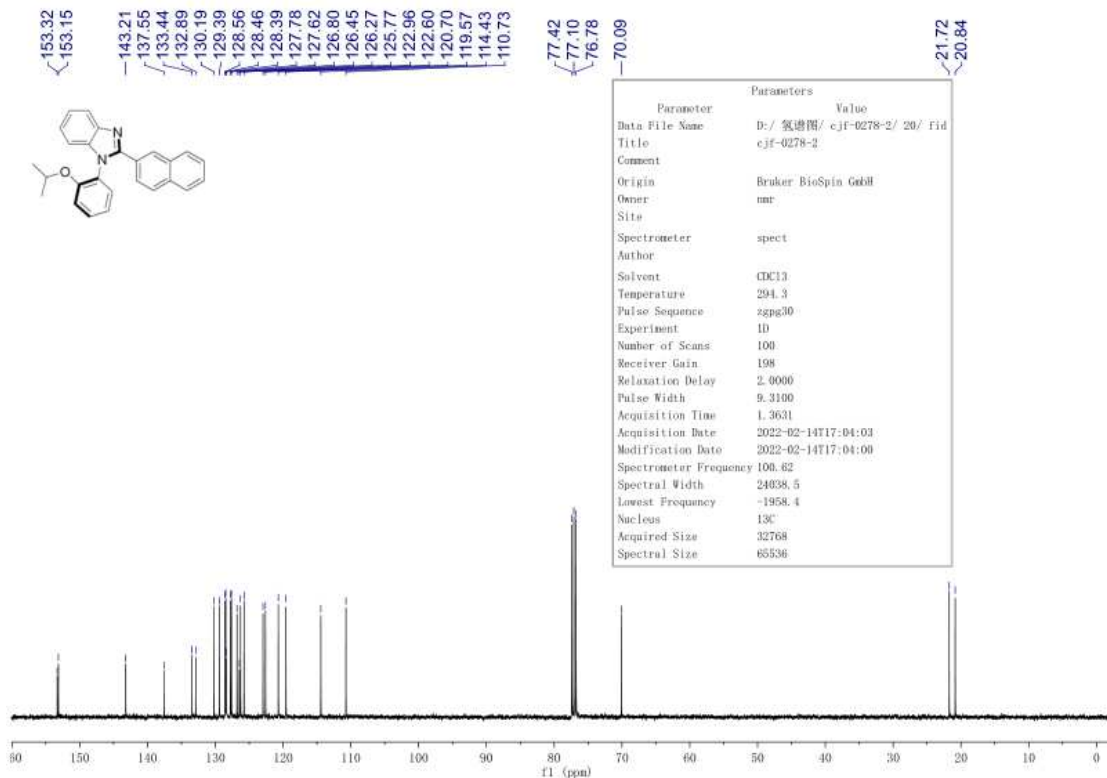

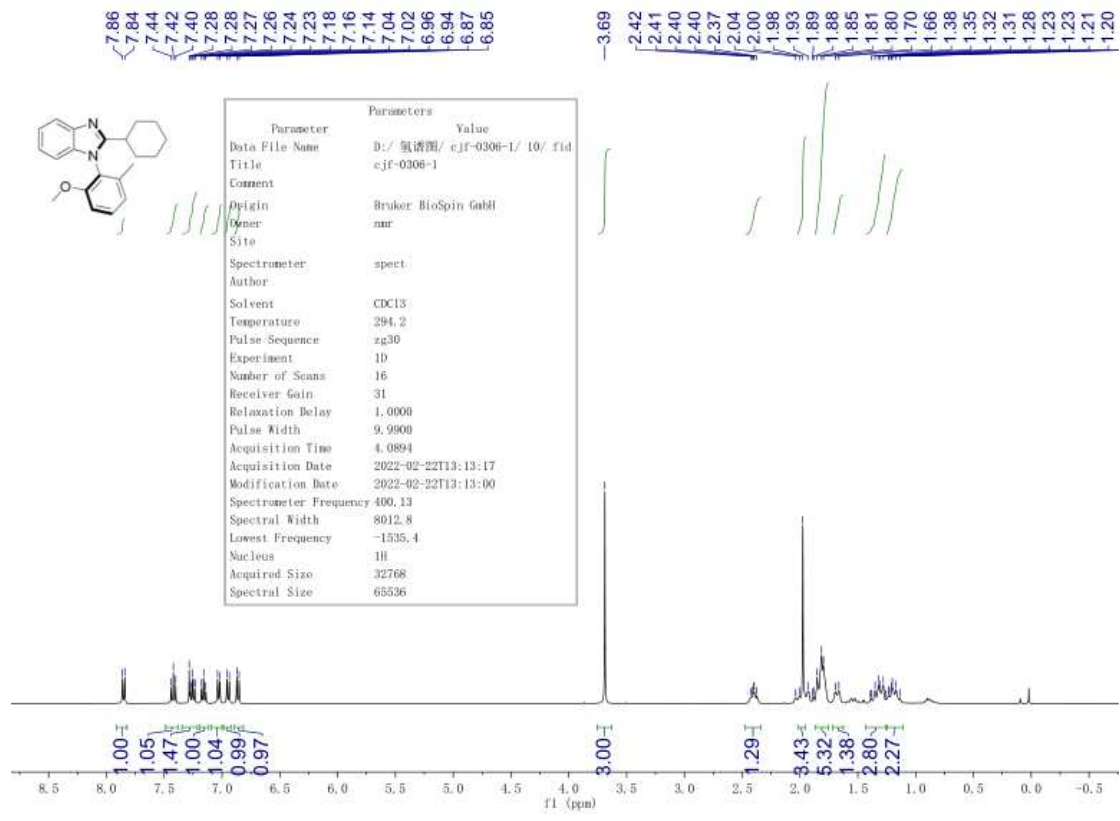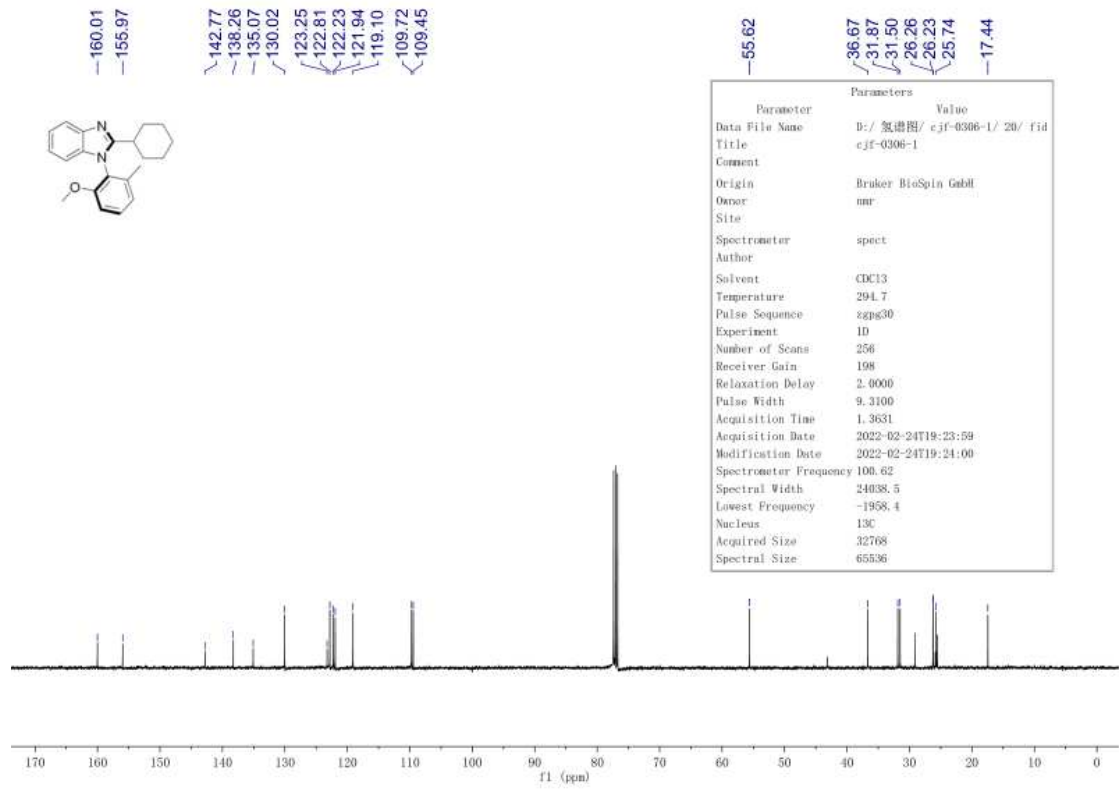

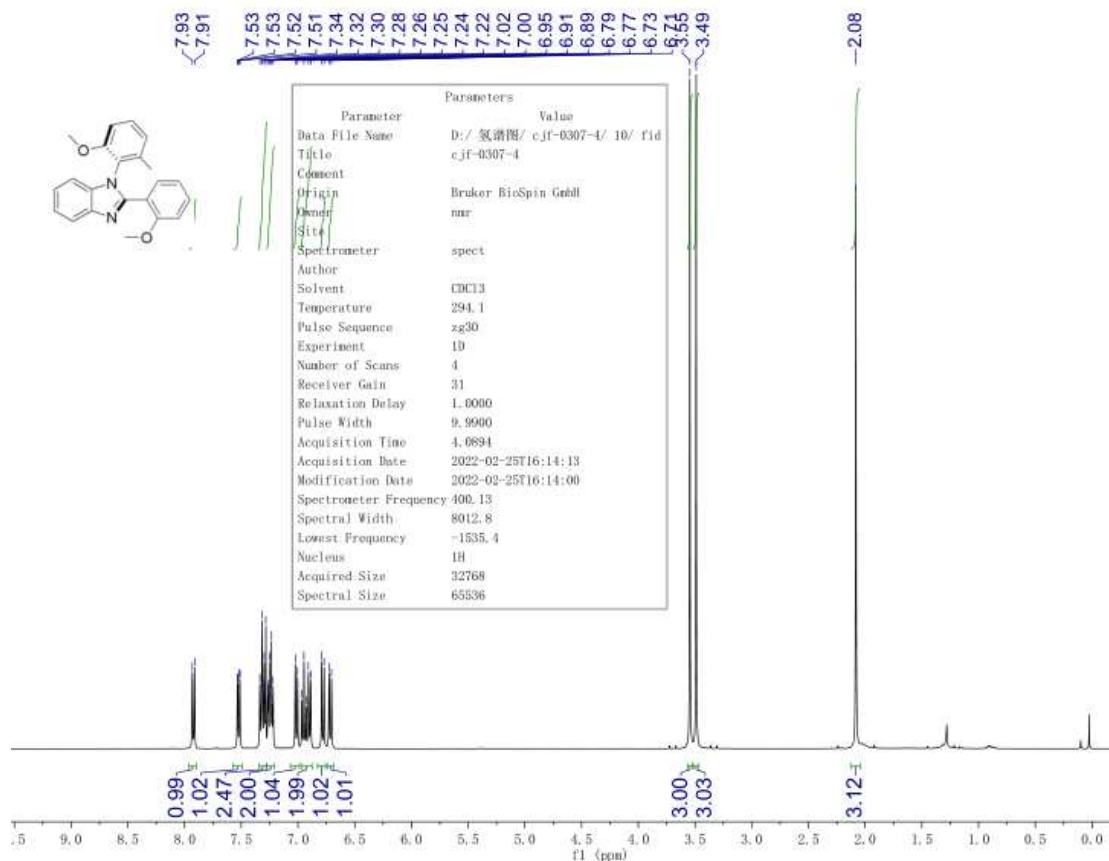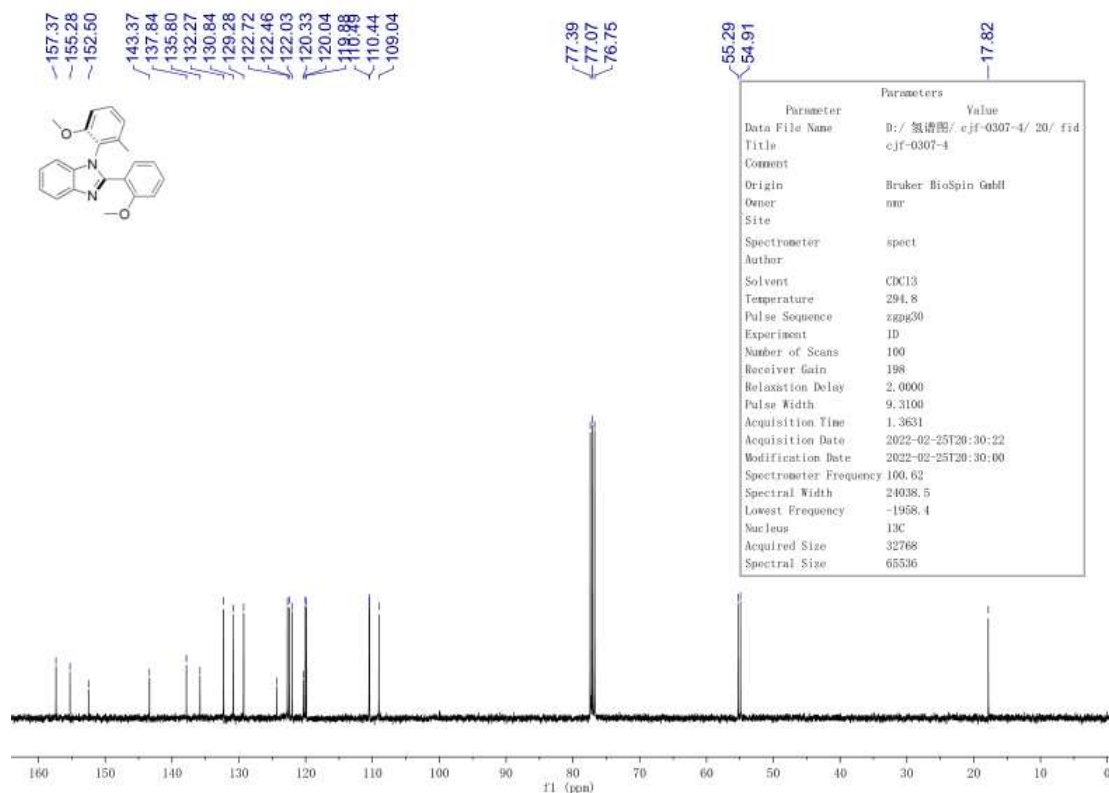

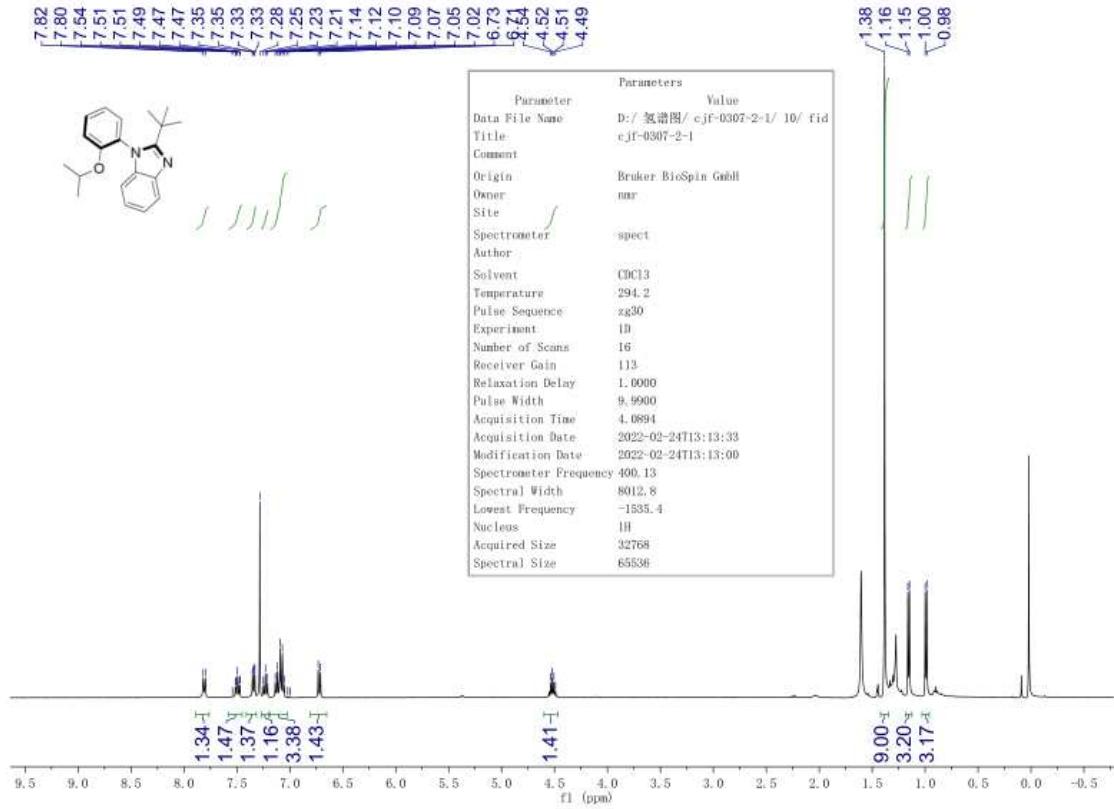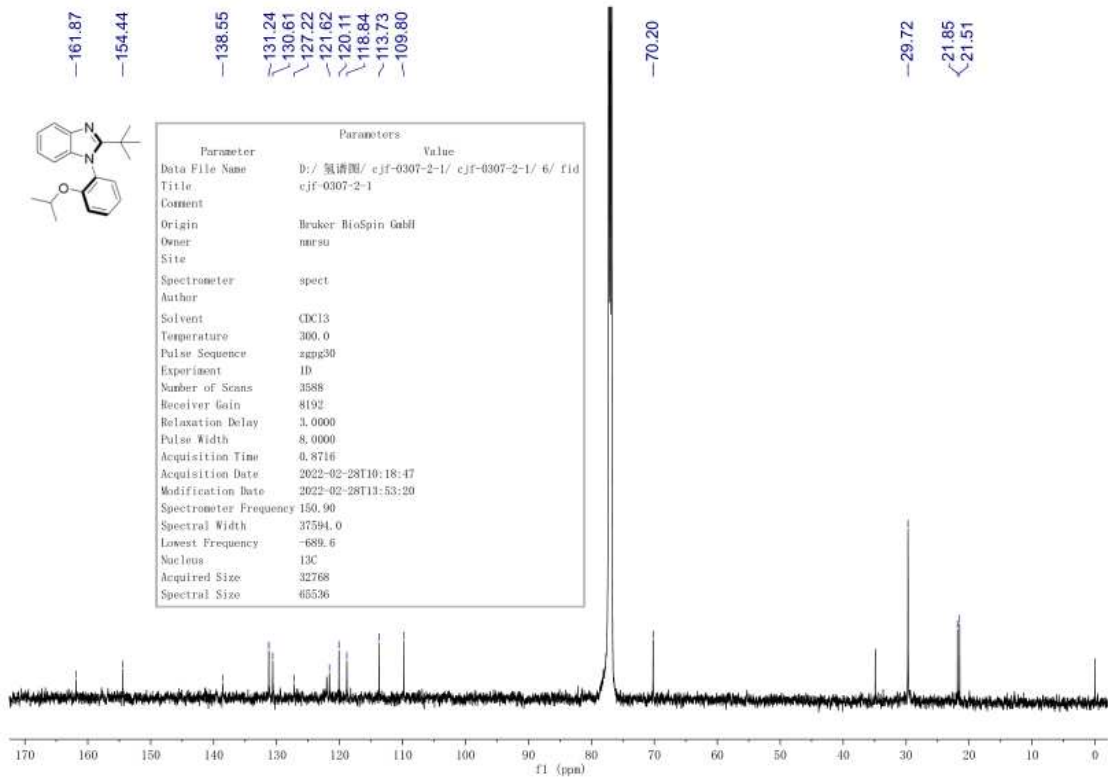

8.09  
8.08  
8.06  
8.05  
8.03  
8.00  
8.00  
7.74  
7.72  
7.65  
7.62  
7.61  
7.59  
7.59  
7.58  
7.57  
7.56  
7.55  
7.53  
7.48  
7.46  
7.45  
7.43  
7.41  
7.39  
7.28  
7.20  
7.20  
7.18  
7.18  
6.85  
6.83  
6.81  
6.81  
6.79  
6.76  
6.75  
6.74

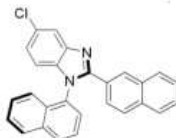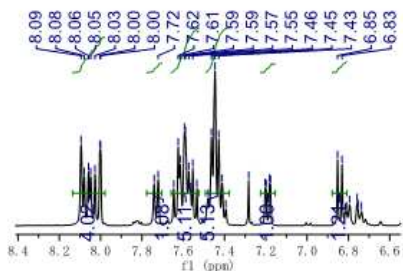

| Parameter              | Value                        |
|------------------------|------------------------------|
| Data File Name         | D:/ 氢谱图/ cjf-0278-6/ 10/ fid |
| Title                  | cjf-0278-6                   |
| Comment                |                              |
| Origin                 | Bruker BioSpin GmbH          |
| Owner                  | nir                          |
| Site                   |                              |
| Spectrometer           | spect                        |
| Author                 |                              |
| Solvent                | CDCl3                        |
| Temperature            | 293.4                        |
| Pulse Sequence         | zg30                         |
| Experiment             | 10                           |
| Number of Scans        | 4                            |
| Receiver Gain          | 31                           |
| Relaxation Delay       | 1.0000                       |
| Pulse Width            | 9.9900                       |
| Acquisition Time       | 4.0894                       |
| Acquisition Date       | 2022-02-14T13:21:36          |
| Modification Date      | 2022-02-14T13:21:00          |
| Spectrometer Frequency | 400.13                       |
| Spectral Width         | 8012.8                       |
| Lowest Frequency       | -1535.4                      |
| Nucleus                | 1H                           |
| Acquired Size          | 32768                        |
| Spectral Size          | 65536                        |

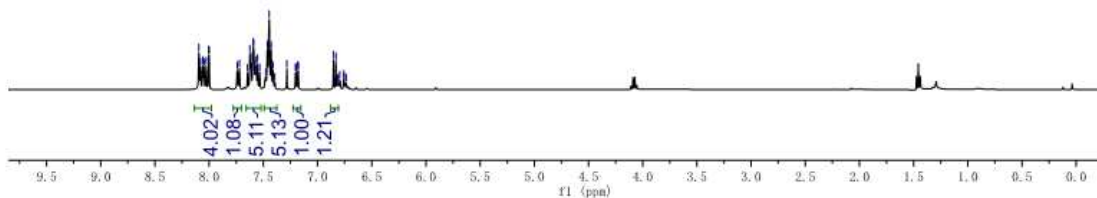

154.49  
143.84  
136.97  
134.51  
133.57  
133.16  
132.73  
130.10  
130.04  
129.18  
128.66  
128.04  
127.99  
127.58  
127.22  
126.80  
126.67  
126.47  
125.73  
125.38  
123.88  
122.56  
120.98  
119.60  
118.46  
115.07  
111.78  
111.47

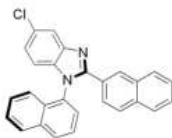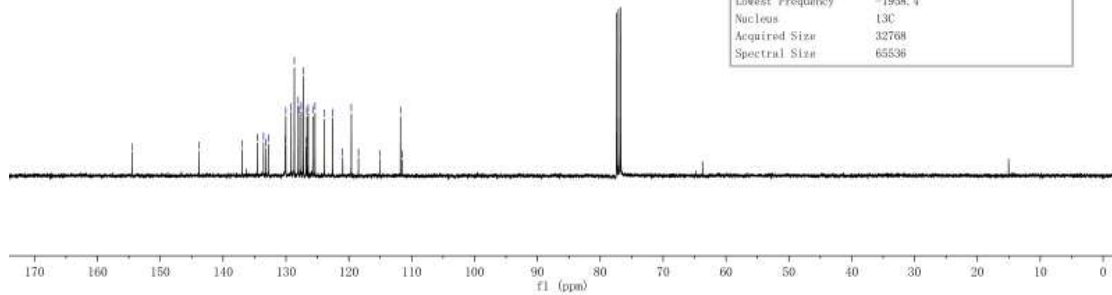

| Parameter              | Value                        |
|------------------------|------------------------------|
| Data File Name         | D:/ 氢谱图/ cjf-0278-6/ 20/ fid |
| Title                  | cjf-0278-6                   |
| Comment                |                              |
| Origin                 | Bruker BioSpin GmbH          |
| Owner                  | nir                          |
| Site                   |                              |
| Spectrometer           | spect                        |
| Author                 |                              |
| Solvent                | CDCl3                        |
| Temperature            | 294.2                        |
| Pulse Sequence         | zgpg30                       |
| Experiment             | 10                           |
| Number of Scans        | 100                          |
| Receiver Gain          | 198                          |
| Relaxation Delay       | 2.0000                       |
| Pulse Width            | 9.3100                       |
| Acquisition Time       | 1.3631                       |
| Acquisition Date       | 2022-02-14T17:12:36          |
| Modification Date      | 2022-02-14T17:12:00          |
| Spectrometer Frequency | 100.62                       |
| Spectral Width         | 24038.5                      |
| Lowest Frequency       | -1958.4                      |
| Nucleus                | 13C                          |
| Acquired Size          | 32768                        |
| Spectral Size          | 65536                        |

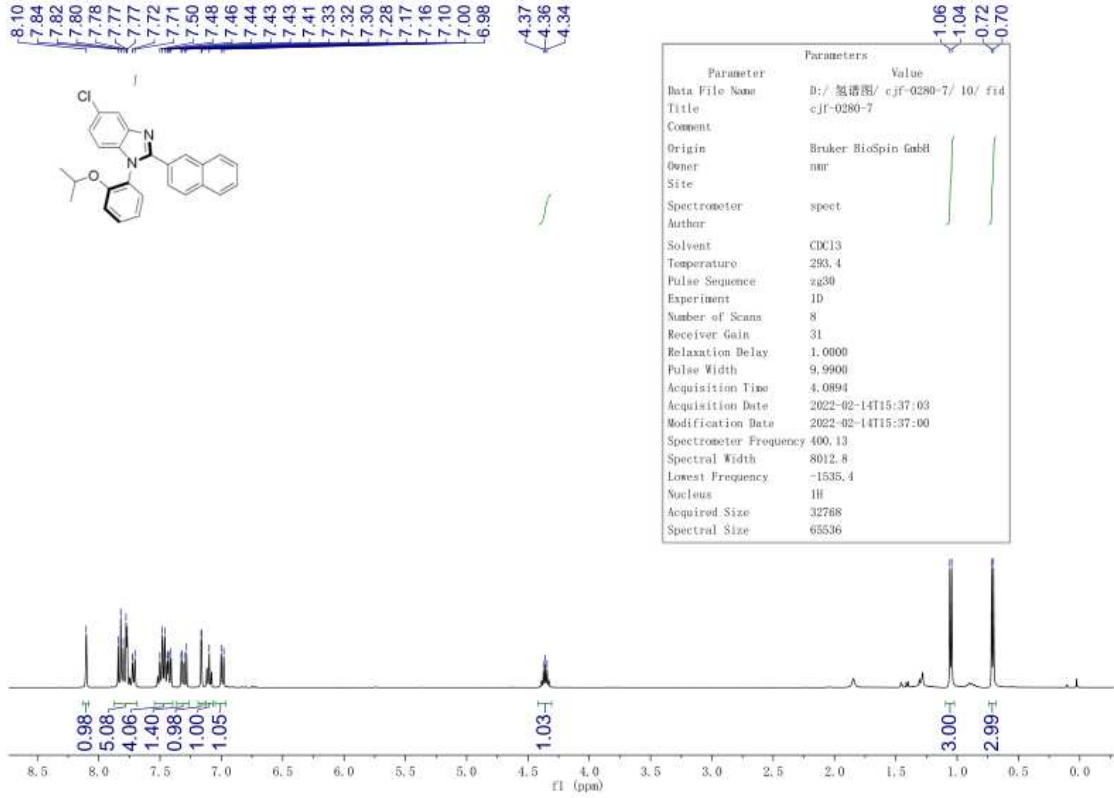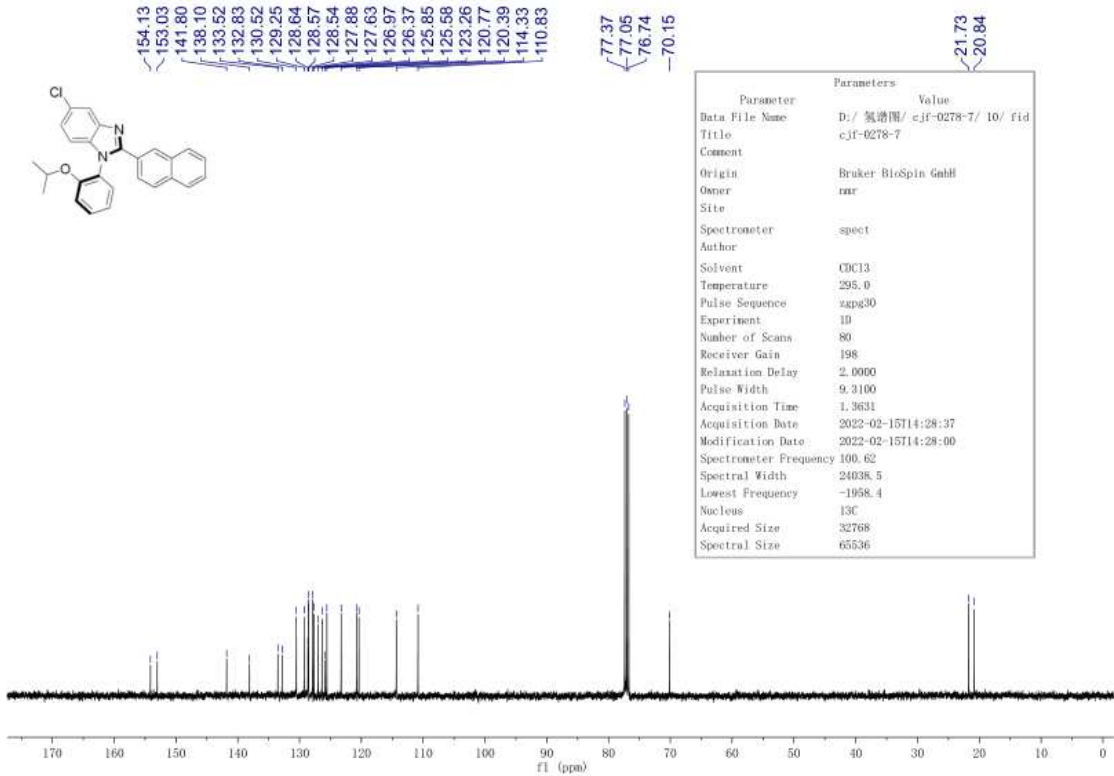



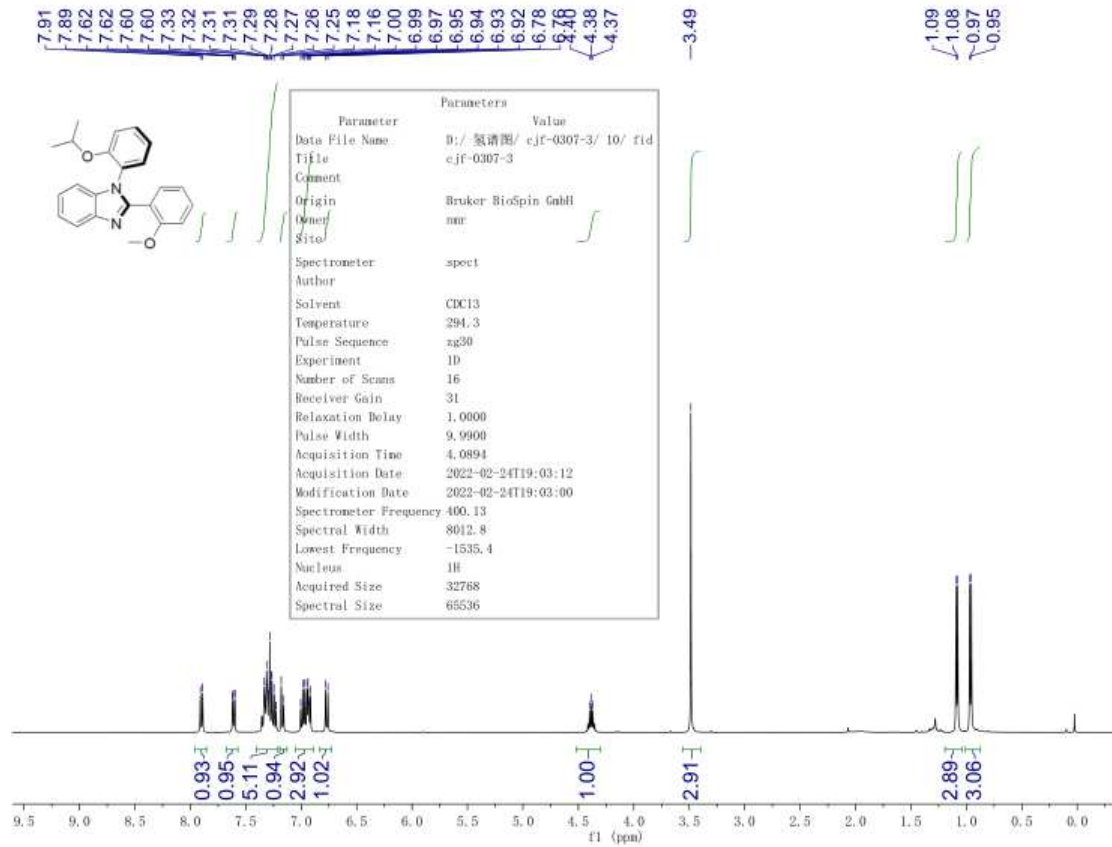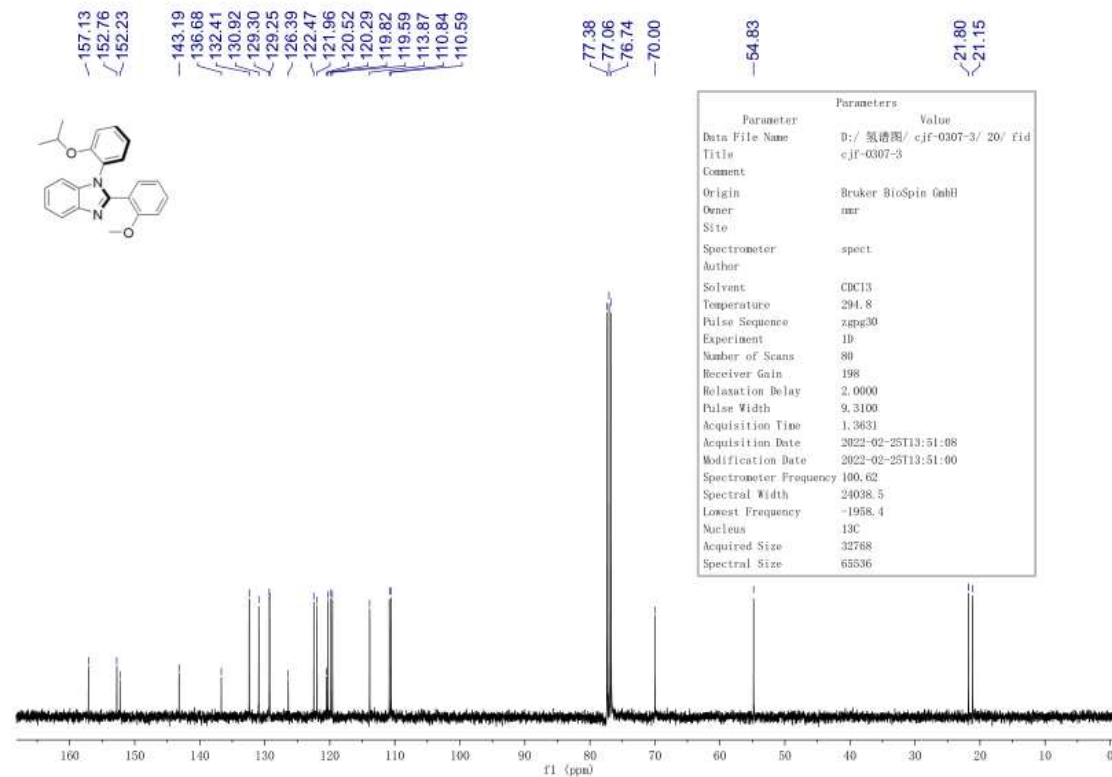

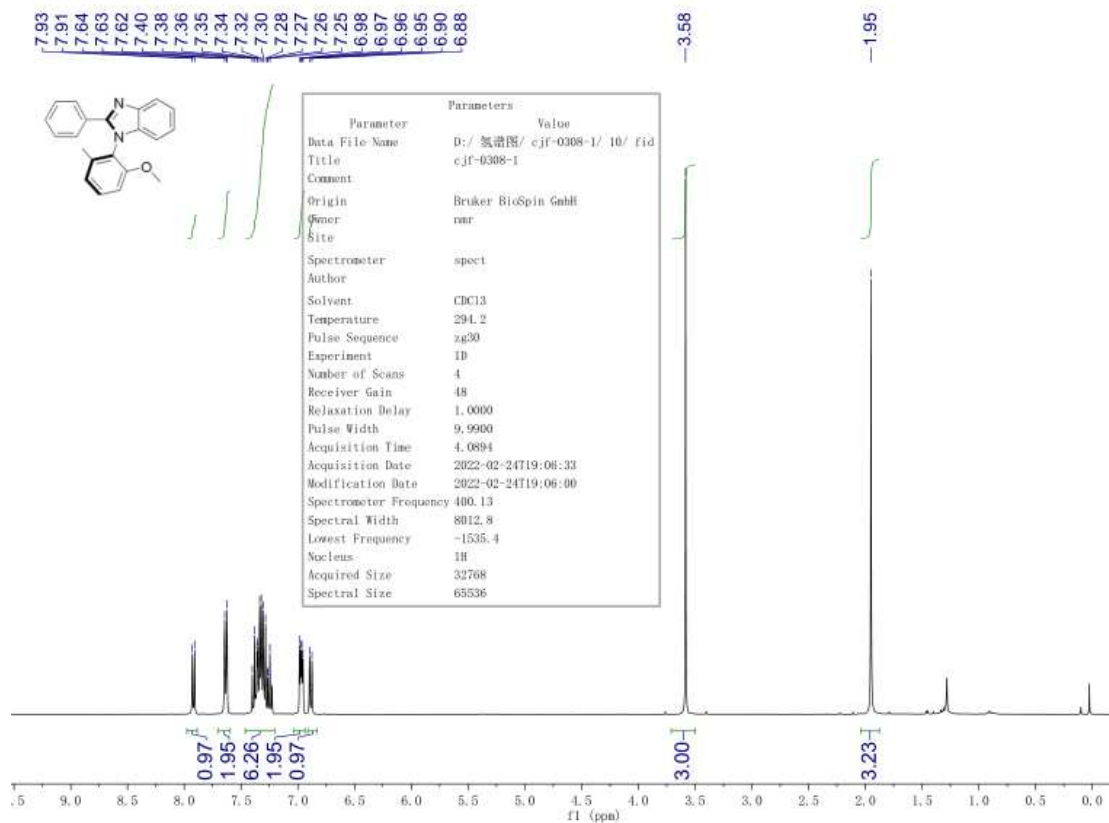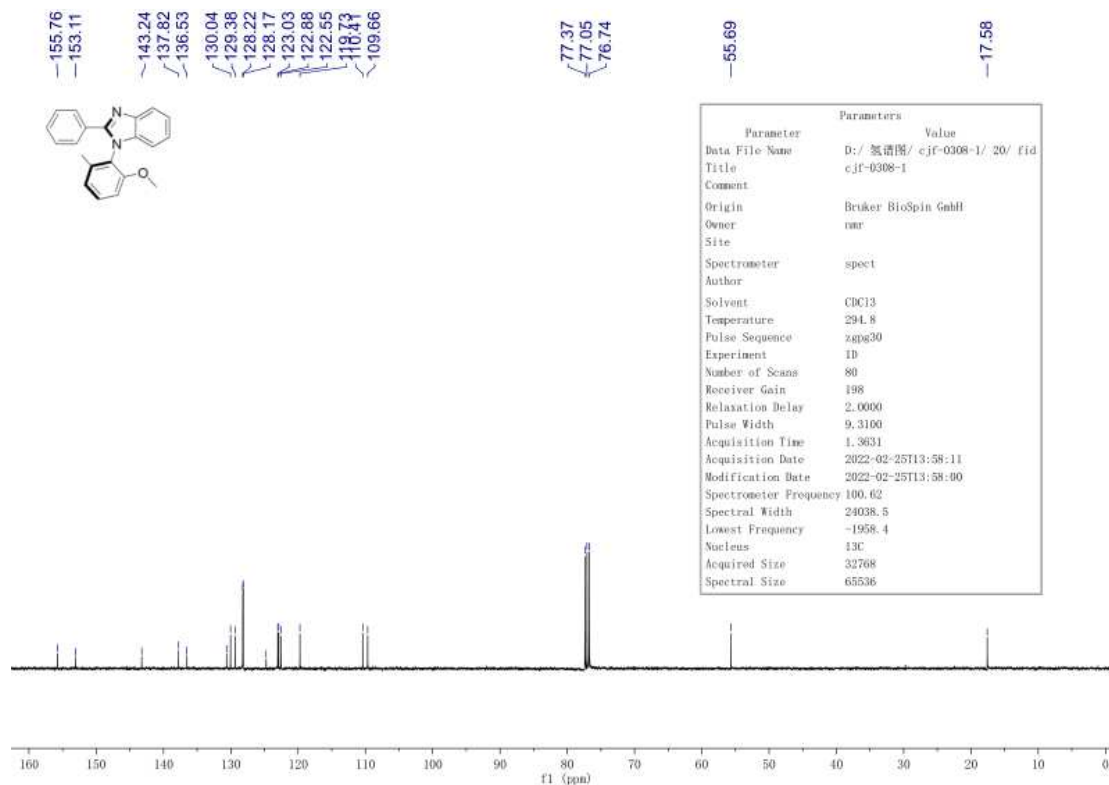



## 10. HPLC analysis spectrums

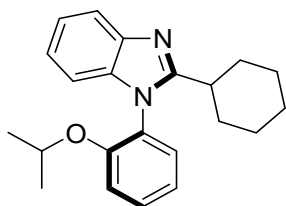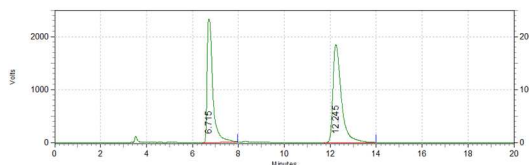

| Peak#  | Retention Time | Area     | Area%   |
|--------|----------------|----------|---------|
| 1      | 6.715          | 39974910 | 46.255  |
| 2      | 12.245         | 46448202 | 53.745  |
| totals |                | 86423112 | 100.000 |

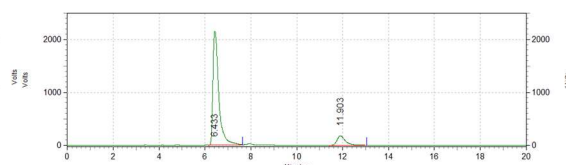

| Peak#  | Retention Time | Area     | Area%   |
|--------|----------------|----------|---------|
| 1      | 6.433          | 37965333 | 89.402  |
| 2      | 11.903         | 4500371  | 10.598  |
| totals |                | 42465704 | 100.000 |

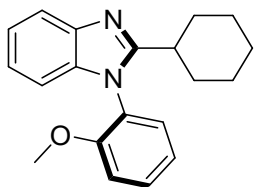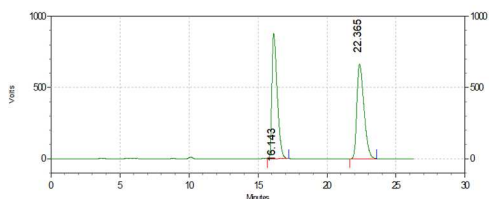

| Peak#  | Retention Time | Area     | Area%   |
|--------|----------------|----------|---------|
| 1      | 16.143         | 23644263 | 49.960  |
| 2      | 22.365         | 23682357 | 50.040  |
| totals |                | 47326620 | 100.000 |

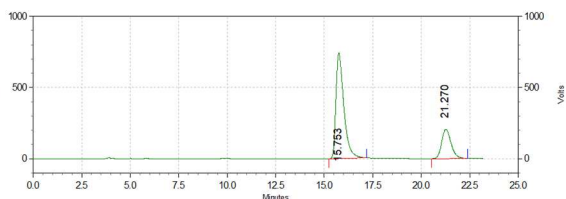

| Peak#  | Retention Time | Area     | Area%   |
|--------|----------------|----------|---------|
| 1      | 15.753         | 20947983 | 75.330  |
| 2      | 21.270         | 6860260  | 24.670  |
| totals |                | 27808243 | 100.000 |

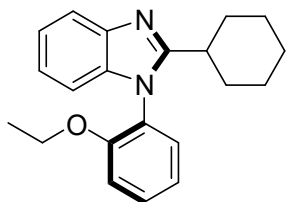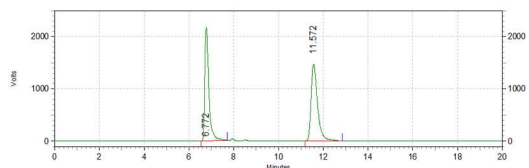

| Peak#  | Retention Time | Area     | Area%   |
|--------|----------------|----------|---------|
| 1      | 6.772          | 27724150 | 48.310  |
| 2      | 11.572         | 29663833 | 51.690  |
| totals |                | 57387983 | 100.000 |

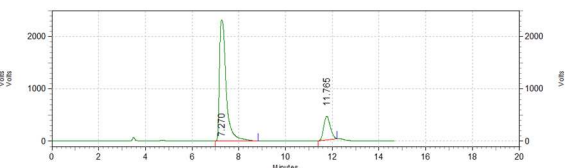

| Peak#  | Retention Time | Area     | Area%   |
|--------|----------------|----------|---------|
| 1      | 7.270          | 45997438 | 83.795  |
| 2      | 11.765         | 8895136  | 16.205  |
| totals |                | 54892574 | 100.000 |

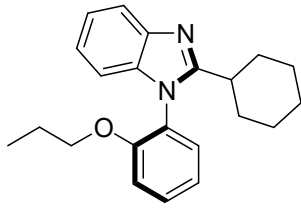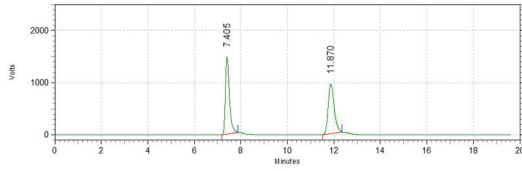

| Peak#  | Retention Time | Area     | Area%   |
|--------|----------------|----------|---------|
| 1      | 7.405          | 17705952 | 50.914  |
| 2      | 11.870         | 17070557 | 49.086  |
| totals |                | 34776509 | 100.000 |

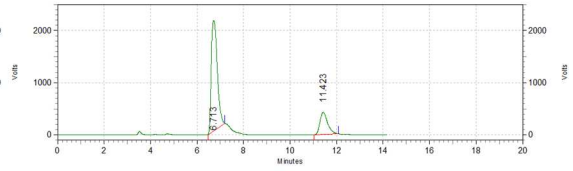

| Peak#  | Retention Time | Area     | Area%   |
|--------|----------------|----------|---------|
| 1      | 6.713          | 37841549 | 79.525  |
| 2      | 11.423         | 9742905  | 20.475  |
| totals |                | 47584454 | 100.000 |

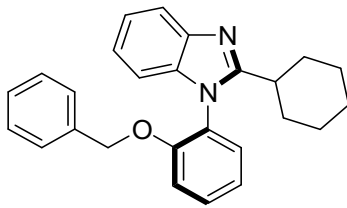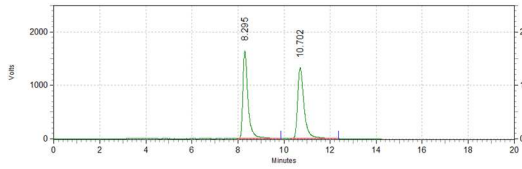

| Peak#  | Retention Time | Area     | Area%   |
|--------|----------------|----------|---------|
| 1      | 8.295          | 25574232 | 49.964  |
| 2      | 10.702         | 25610792 | 50.036  |
| totals |                | 51185024 | 100.000 |

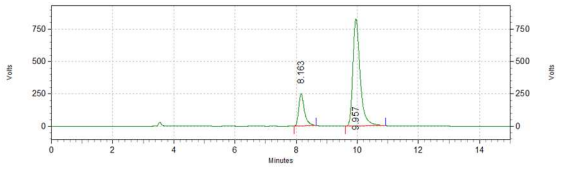

| Peak#  | Retention Time | Area     | Area%   |
|--------|----------------|----------|---------|
| 1      | 8.163          | 3206785  | 18.960  |
| 2      | 9.957          | 13707081 | 81.040  |
| totals |                | 16913866 | 100.000 |

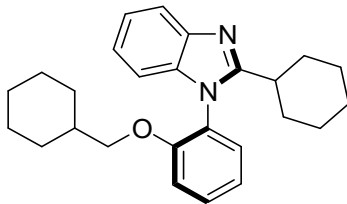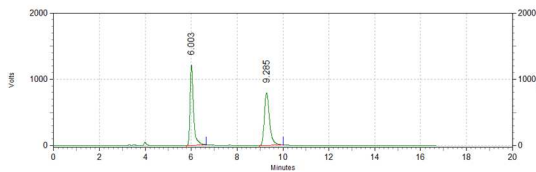

| Peak#  | Retention Time | Area     | Area%   |
|--------|----------------|----------|---------|
| 1      | 6.003          | 12656469 | 50.611  |
| 2      | 9.285          | 12350770 | 49.389  |
| totals |                | 25007239 | 100.000 |

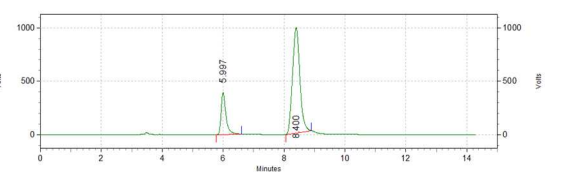

| Peak#  | Retention Time | Area     | Area%   |
|--------|----------------|----------|---------|
| 1      | 5.997          | 4318053  | 20.780  |
| 2      | 8.400          | 16462239 | 79.220  |
| totals |                | 20780292 | 100.000 |

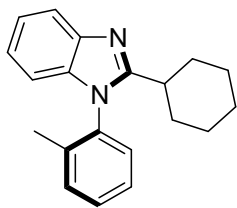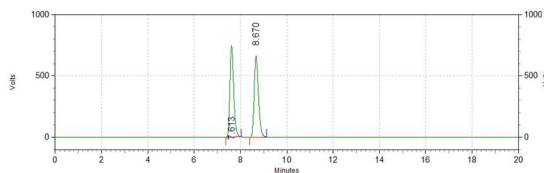

| Peak#  | Retention Time | Area     | Area%   |
|--------|----------------|----------|---------|
| 1      | 7.613          | 8416800  | 49.729  |
| 2      | 8.670          | 8508577  | 50.271  |
| totals |                | 16925377 | 100.000 |

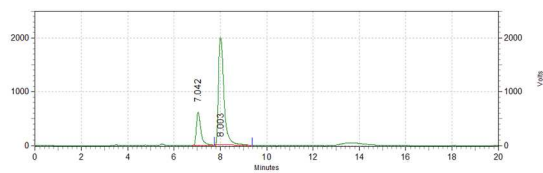

| Peak#  | Retention Time | Area     | Area%   |
|--------|----------------|----------|---------|
| 1      | 7.042          | 8177654  | 19.917  |
| 2      | 8.003          | 32881779 | 80.083  |
| totals |                | 41059433 | 100.000 |

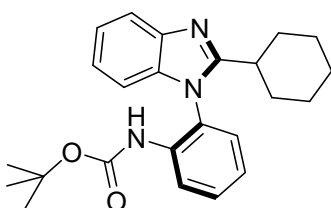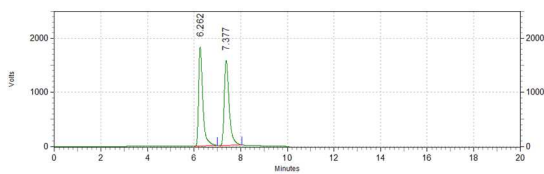

| Peak#  | Retention Time | Area     | Area%   |
|--------|----------------|----------|---------|
| 1      | 6.262          | 22947594 | 50.056  |
| 2      | 7.377          | 22896595 | 49.944  |
| totals |                | 45844189 | 100.000 |

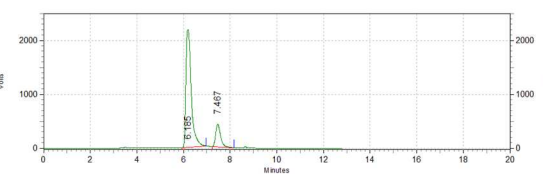

| Peak#  | Retention Time | Area     | Area%   |
|--------|----------------|----------|---------|
| 1      | 6.185          | 34546303 | 84.835  |
| 2      | 7.467          | 6175427  | 15.165  |
| totals |                | 40721730 | 100.000 |

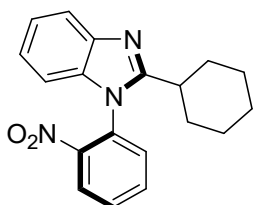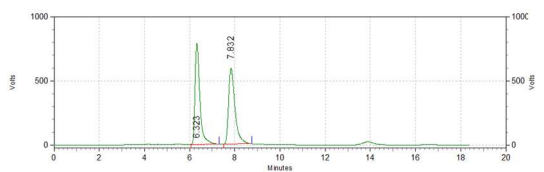

| Peak#  | Retention Time | Area     | Area%   |
|--------|----------------|----------|---------|
| 1      | 6.323          | 11680413 | 50.187  |
| 2      | 7.832          | 11593512 | 49.813  |
| totals |                | 23273925 | 100.000 |

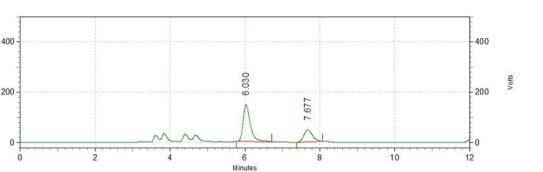

| Peak#  | Retention Time | Area    | Area%   |
|--------|----------------|---------|---------|
| 1      | 6.030          | 1936560 | 71.796  |
| 2      | 7.677          | 760744  | 28.204  |
| totals |                | 2697304 | 100.000 |

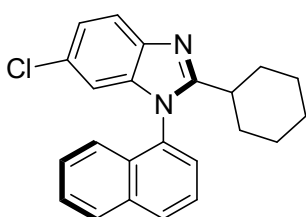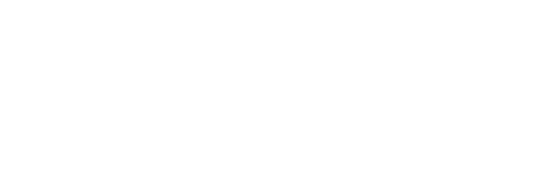

| Peak#  | Retention Time | Area     | Area%   |
|--------|----------------|----------|---------|
| 1      | 6.323          | 11680413 | 50.187  |
| 2      | 7.832          | 11593512 | 49.813  |
| totals |                | 23273925 | 100.000 |

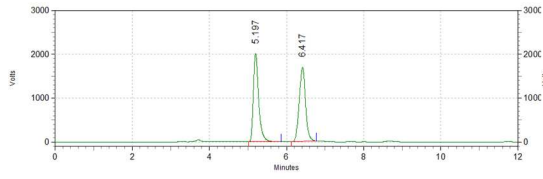

| Peak#  | Retention Time | Area     | Area%   |
|--------|----------------|----------|---------|
| 1      | 5.197          | 19404805 | 50.232  |
| 2      | 6.417          | 19225659 | 49.768  |
| totals |                | 38630464 | 100.000 |

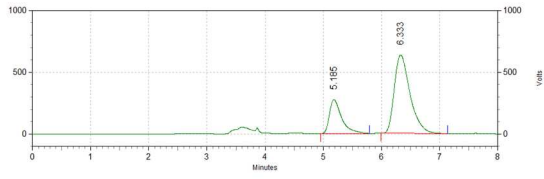

| Peak#  | Retention Time | Area     | Area%   |
|--------|----------------|----------|---------|
| 1      | 5.185          | 3990846  | 25.015  |
| 2      | 6.333          | 11963193 | 74.985  |
| totals |                | 15954039 | 100.000 |

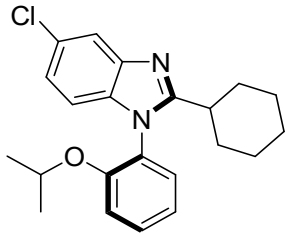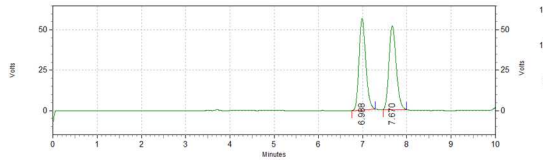

| Peak#  | Retention Time | Area    | Area%   |
|--------|----------------|---------|---------|
| 1      | 6.988          | 597967  | 50.343  |
| 2      | 7.670          | 589816  | 49.657  |
| totals |                | 1187783 | 100.000 |

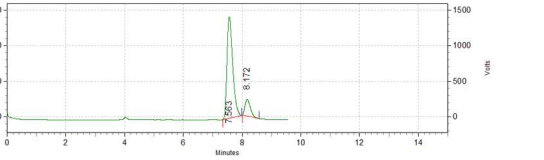

| Peak#  | Retention Time | Area     | Area%   |
|--------|----------------|----------|---------|
| 1      | 7.563          | 19315082 | 86.223  |
| 2      | 8.172          | 3086247  | 13.777  |
| totals |                | 22401329 | 100.000 |

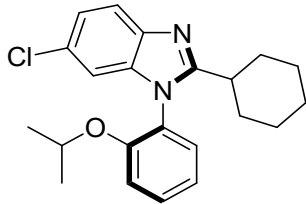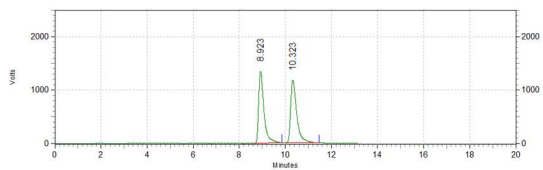

| Peak#  | Retention Time | Area     | Area%   |
|--------|----------------|----------|---------|
| 1      | 8.923          | 21285133 | 50.076  |
| 2      | 10.323         | 21220283 | 49.924  |
| totals |                | 42505416 | 100.000 |

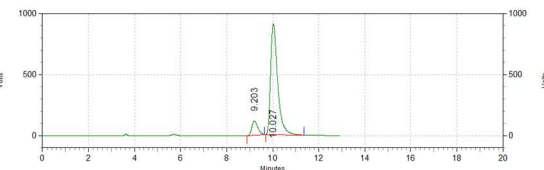

| Peak#  | Retention Time | Area     | Area%   |
|--------|----------------|----------|---------|
| 1      | 9.203          | 2116545  | 9.889   |
| 2      | 10.027         | 19286948 | 90.111  |
| totals |                | 21403493 | 100.000 |

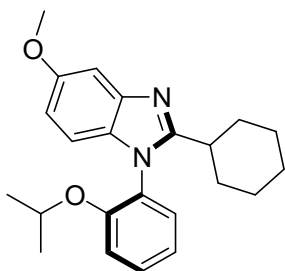

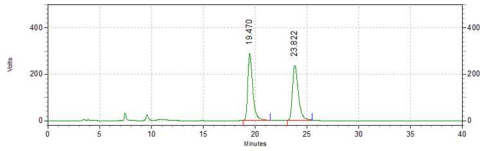

| Peak#  | Retention Time | Area     | Area%   |
|--------|----------------|----------|---------|
| 1      | 19.470         | 9532097  | 50.777  |
| 2      | 23.822         | 9240360  | 49.223  |
| totals |                | 18772457 | 100.000 |

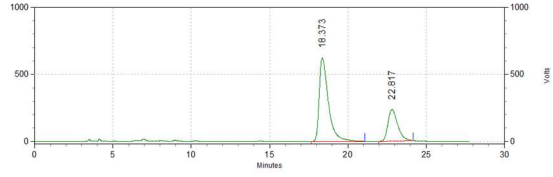

| Peak#  | Retention Time | Area     | Area%   |
|--------|----------------|----------|---------|
| 1      | 18.373         | 25243267 | 71.528  |
| 2      | 22.817         | 10048407 | 28.472  |
| totals |                | 35291674 | 100.000 |

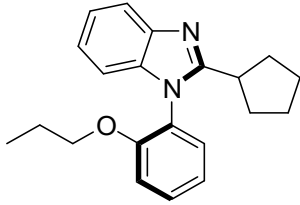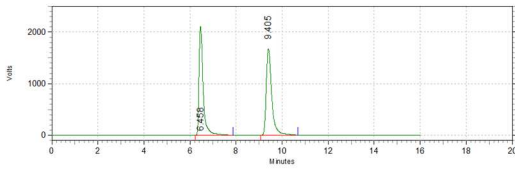

| Peak#  | Retention Time | Area     | Area%   |
|--------|----------------|----------|---------|
| 1      | 6.458          | 26565884 | 48.875  |
| 2      | 9.405          | 27788672 | 51.125  |
| totals |                | 54354556 | 100.000 |

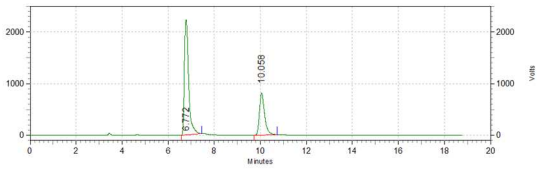

| Peak#  | Retention Time | Area     | Area%   |
|--------|----------------|----------|---------|
| 1      | 6.772          | 28523839 | 69.009  |
| 2      | 10.058         | 12809725 | 30.991  |
| totals |                | 41333564 | 100.000 |

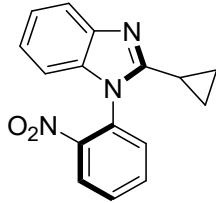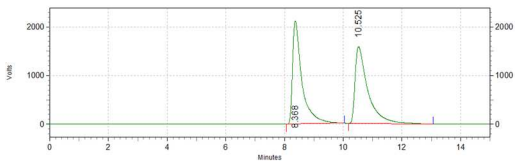

| Peak#  | Retention Time | Area     | Area%   |
|--------|----------------|----------|---------|
| 1      | 8.368          | 47043274 | 49.730  |
| 2      | 10.525         | 47553205 | 50.270  |
| totals |                | 94596479 | 100.000 |

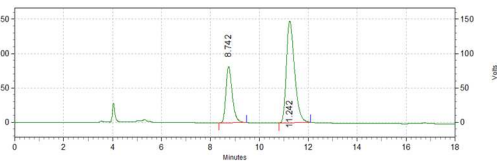

| Peak#  | Retention Time | Area    | Area%   |
|--------|----------------|---------|---------|
| 1      | 8.742          | 1460348 | 29.842  |
| 2      | 11.242         | 3433214 | 70.158  |
| totals |                | 4893562 | 100.000 |

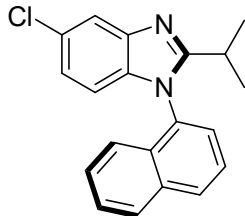

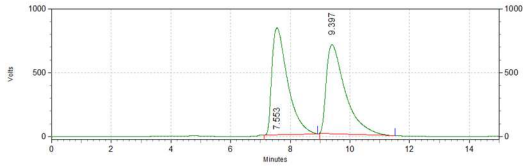

| Peak#  | Retention Time | Area     | Area%   |
|--------|----------------|----------|---------|
| 1      | 7.553          | 30592674 | 49.947  |
| 2      | 9.397          | 30657795 | 50.053  |
| totals |                | 61250469 | 100.000 |

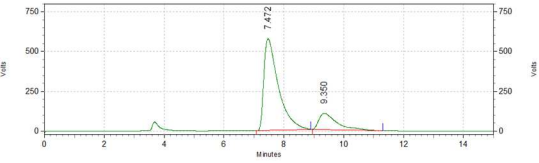

| Peak#  | Retention Time | Area     | Area%   |
|--------|----------------|----------|---------|
| 1      | 7.472          | 19410139 | 81.978  |
| 2      | 9.350          | 4266974  | 18.022  |
| totals |                | 23677113 | 100.000 |

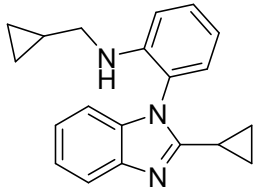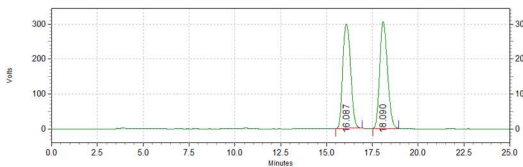

| Peak#  | Retention Time | Area     | Area%   |
|--------|----------------|----------|---------|
| 1      | 16.087         | 8964567  | 49.932  |
| 2      | 18.090         | 8989010  | 50.068  |
| totals |                | 17953577 | 100.000 |

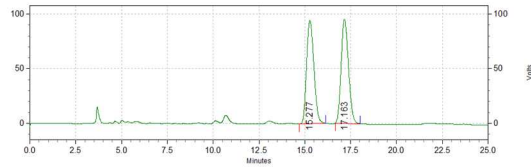

| Peak#  | Retention Time | Area    | Area%   |
|--------|----------------|---------|---------|
| 1      | 15.277         | 2614606 | 49.699  |
| 2      | 17.163         | 2646271 | 50.301  |
| totals |                | 5260877 | 100.000 |

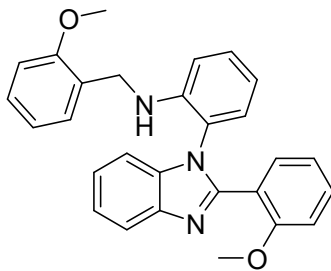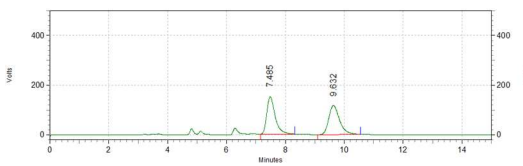

| Peak#  | Retention Time | Area    | Area%   |
|--------|----------------|---------|---------|
| 1      | 7.485          | 2956575 | 49.923  |
| 2      | 9.632          | 2965727 | 50.077  |
| totals |                | 5922302 | 100.000 |

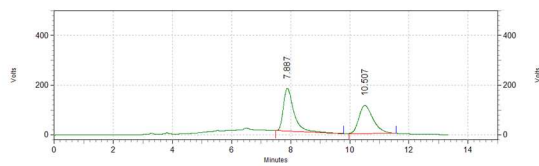

| Peak#  | Retention Time | Area    | Area%   |
|--------|----------------|---------|---------|
| 1      | 7.887          | 4236831 | 53.047  |
| 2      | 10.507         | 3750072 | 46.953  |
| totals |                | 7986903 | 100.000 |

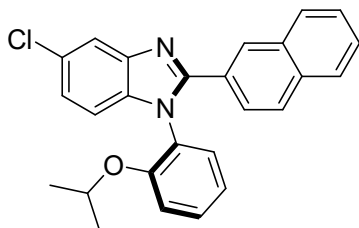

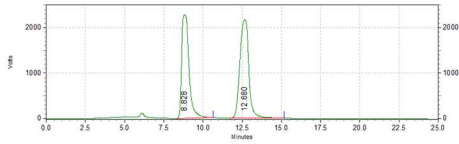

| Peak#  | Retention Time | Area      | Area%   |
|--------|----------------|-----------|---------|
| 1      | 8.828          | 73292526  | 46.314  |
| 2      | 12.680         | 84957212  | 53.686  |
| totals |                | 158249738 | 100.000 |

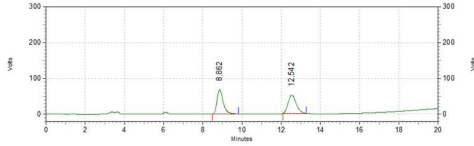

| Peak#  | Retention Time | Area    | Area%   |
|--------|----------------|---------|---------|
| 1      | 8.862          | 1480376 | 49.816  |
| 2      | 12.542         | 1491318 | 50.184  |
| totals |                | 2971694 | 100.000 |

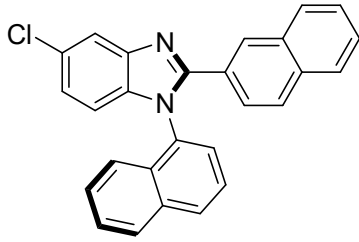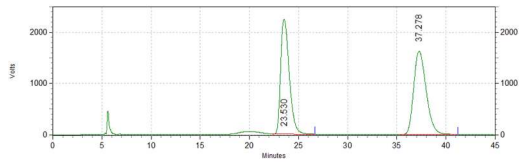

| Peak#  | Retention Time | Area      | Area%   |
|--------|----------------|-----------|---------|
| 1      | 23.530         | 136776120 | 48.765  |
| 2      | 37.278         | 143703831 | 51.235  |
| totals |                | 280479951 | 100.000 |

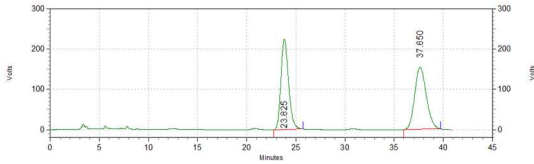

| Peak#  | Retention Time | Area     | Area%   |
|--------|----------------|----------|---------|
| 1      | 23.825         | 12055803 | 48.769  |
| 2      | 37.650         | 12664225 | 51.231  |
| totals |                | 24720028 | 100.000 |

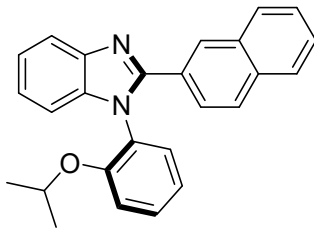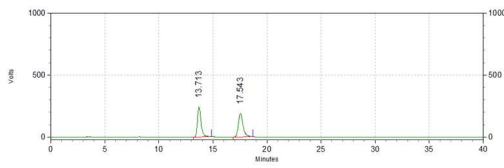

| Peak#  | Retention Time | Area     | Area%   |
|--------|----------------|----------|---------|
| 1      | 13.713         | 5586493  | 49.718  |
| 2      | 17.543         | 5649858  | 50.282  |
| totals |                | 11236351 | 100.000 |

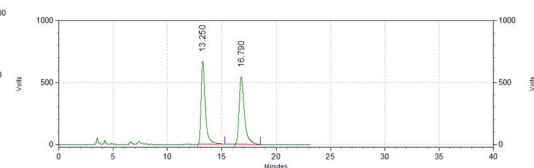

| Peak#  | Retention Time | Area     | Area%   |
|--------|----------------|----------|---------|
| 1      | 13.250         | 17750750 | 49.581  |
| 2      | 16.790         | 18050708 | 50.419  |
| totals |                | 35801458 | 100.000 |

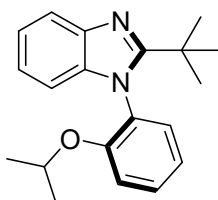

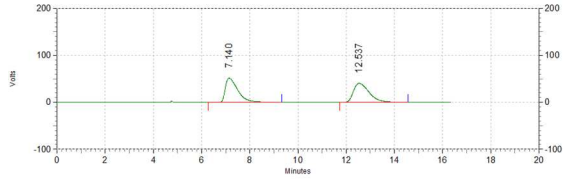

| Peak#  | Retention Time | Area    | Area%   |
|--------|----------------|---------|---------|
| 1      | 7.140          | 1860892 | 50.255  |
| 2      | 12.537         | 1842002 | 49.745  |
| totals |                | 3702894 | 100.000 |

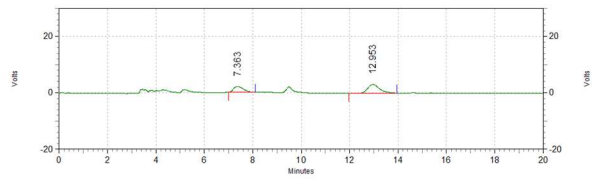

| Peak#  | Retention Time | Area   | Area%   |
|--------|----------------|--------|---------|
| 1      | 7.363          | 57222  | 35.039  |
| 2      | 12.953         | 106087 | 64.961  |
| totals |                | 163309 | 100.000 |

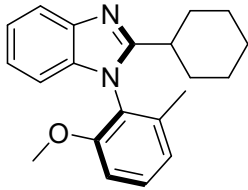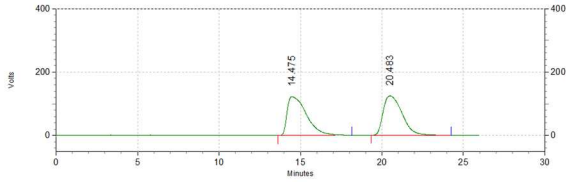

| Peak#  | Retention Time | Area     | Area%   |
|--------|----------------|----------|---------|
| 1      | 14.475         | 10045817 | 50.086  |
| 2      | 20.483         | 10011152 | 49.914  |
| totals |                | 20056969 | 100.000 |

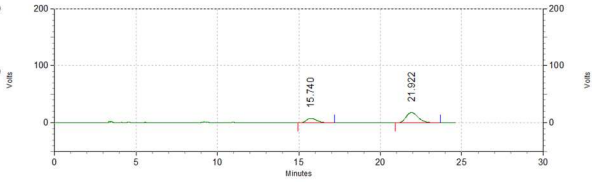

| Peak#  | Retention Time | Area    | Area%   |
|--------|----------------|---------|---------|
| 1      | 15.740         | 373203  | 28.184  |
| 2      | 21.922         | 950960  | 71.816  |
| totals |                | 1324163 | 100.000 |

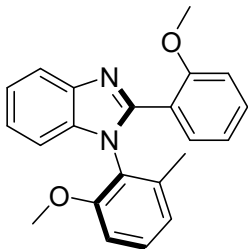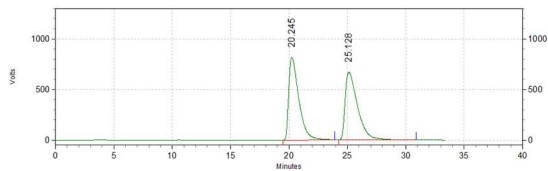

| Peak#  | Retention Time | Area     | Area%   |
|--------|----------------|----------|---------|
| 1      | 20.245         | 48953527 | 49.961  |
| 2      | 25.128         | 49029353 | 50.039  |
| totals |                | 97982880 | 100.000 |

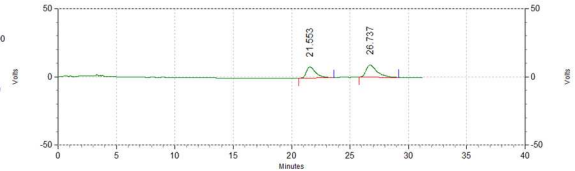

| Peak#  | Retention Time | Area    | Area%   |
|--------|----------------|---------|---------|
| 1      | 21.553         | 451347  | 43.923  |
| 2      | 26.737         | 576237  | 56.077  |
| totals |                | 1027584 | 100.000 |



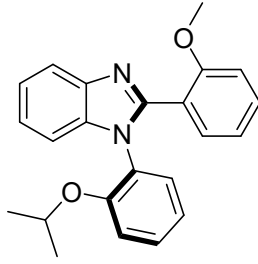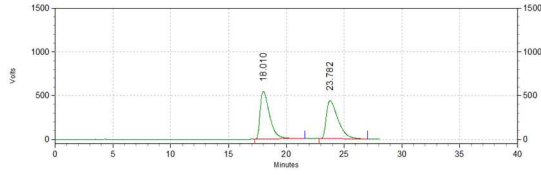

| Peak#  | Retention Time | Area     | Area%   |
|--------|----------------|----------|---------|
| 1      | 18.010         | 31184859 | 50.604  |
| 2      | 23.782         | 30440087 | 49.396  |
| totals |                | 61624946 | 100.000 |

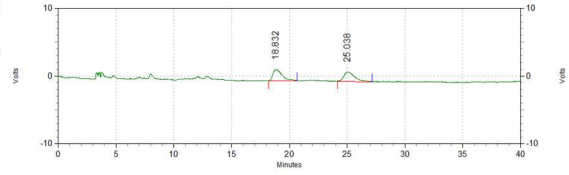

| Peak#  | Retention Time | Area   | Area%   |
|--------|----------------|--------|---------|
| 1      | 18.832         | 89084  | 50.428  |
| 2      | 25.038         | 87572  | 49.572  |
| totals |                | 176656 | 100.000 |
